# Supplementary material for: Towards the synthesis of a Yersinia pestis cell wall polysaccharide: enantioselective synthesis of an l-glycero-d-manno-heptose building block
Source: Royal Society of Chemistry journal article supplement (doi:10.1039/c000784f), 2010-01-01

## Supporting Information for:

# **Towards the synthesis of a *Yersinia pestis* cell wall polysaccharide: Enantioselective synthesis of an L-glycero-D-manno-heptose building block**

Takafumi Ohara,<sup>§a</sup> Alexander Adibekian,<sup>+a</sup> Davide Esposito,<sup>a</sup> Pierre Stallforth,<sup>a</sup> and Peter H. Seeberger <sup>\*a</sup>

<sup>a</sup> Department of Biomolecular Systems, Max Planck Institute of Colloids and Interfaces, Am Mühlenberg 1, 14776 Potsdam, Germany and Freie Universität Berlin Institut für Chemie und Biochemie, Arnimallee 22, 14195 Berlin

<sup>§</sup> Current Address: Shionogi & Co., Ltd. Shionogi Research Laboratories, 12-4, 5-Chome, Fukushima-ku, Osaka, 553-0002, Japan.

<sup>+</sup> Current Address: Department of Chemical Physiology, The Scripps Research Institute, 10550 North Torrey Pines Road, La Jolla, CA 92037, United States.

## **Experimental Section**

**General Information for Chemical Synthesis:** All chemicals used were reagent grade and used as supplied except where noted. All reactions were performed in oven-dried glassware under an inert atmosphere unless noted otherwise. Reagent grade *N,N*-dimethylformamide (DMF) was dried over activated molecular sieves prior to use. Pyridine, triethylamine (NEt<sub>3</sub>) and acetonitrile (MeCN) were distilled over CaH<sub>2</sub> prior to use. Dichloromethane (CH<sub>2</sub>Cl<sub>2</sub>), toluene and tetrahydrofuran (THF) were purified by a Cycle-Tainer Solvent Delivery System unless noted otherwise. Analytical thin layer chromatography (TLC) was performed on Merck silica gel 60 F254 plates (0.25mm). Compounds were visualized by UV irradiation or dipping the plate in a cerium sulfate-ammonium molybdate (CAM) solution. Flash column chromatography was carried out using forced flow of the indicated solvent on Fluka Kieselgel 60 (230-400 mesh). Purification by size exclusion recycling HPLC was carried out using JAI LC 9101 equipped with JAIGEL-1H and 2-H column in a series (CHCl<sub>3</sub>). <sup>1</sup>H, <sup>13</sup>C spectra were recorded on a Varian Mercury 300 (300 MHz), Bruker ECX (400 MHz), Bruker DRX500 (500 MHz), or, Bruker DRX700 (700 MHz) spectrometer in CDCl<sub>3</sub> with chemical shifts

referenced to internal standards  $\text{CDCl}_3$  (7.26 ppm  $^1\text{H}$ , 77.0 ppm  $^{13}\text{C}$ ) unless otherwise stated. Splitting patterns are indicated as s, singlet; d, doublet; t, triplet; q, quartet; brs, broad singlet for  $^1\text{H}$  NMR data. NMR chemical shifts ( $\delta$ ) are reported in ppm and coupling constants ( $J$ ) are reported in Hz. High resolution mass spectral (HRMS) analyses were performed by the MS-service at the Laboratory for Organic Chemistry (LOC) at ETH Zürich and the MS-service at Department of Organic Chemistry at Free University Berlin. High-resolution MALDI and ESI mass spectra were run on an IonSpec Ultra instrument. IR spectra were recorded on a Perkin-Elmer 1600 FTI R spectrometer. Optical rotations were measured using a Perkin-Elmer 241 and Unipol L1000 polarimeter.

### Synthetic Procedures:

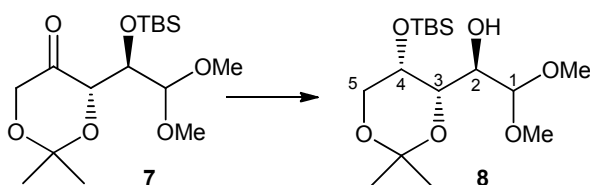

#### 3,5-*O*-Isopropylidene-4-*O*-*tert*-butyldimethylsilyl-L-lyxose dimethyl acetal (**8**):

To a solution of 3,5-*O*-Isopropylidene-2,4-di-*O*-*tert*-butyldimethylsilyl-L-lyxose dimethyl acetal **7** (18.88 g, 54 mmol) in THF (290 mL) was carefully added L-Selectride (1M in hexane, 76 mL) dropwise at  $-78^\circ\text{C}$  and the resulting solution was stirred at  $-78^\circ\text{C}$  for 3 h and further stirred at rt for 16 h. Upon complete consumption of compound **7**, sat. aq.  $\text{NH}_4\text{Cl}$  was added to the resulting solution and the reaction mixture was extracted with EtOAc, and the organic phase was washed with sat. aq.  $\text{NH}_4\text{Cl}$ , brine, dried over  $\text{MgSO}_4$ , filtered and concentrated to give an oil that was purified by flash chromatography (15:1 to 10:1 cyclohexane / EtOAc) to provide **8** as colorless oil (14.95 g, 79%).  $[\alpha]_{\text{D}}^{25} = +11.50$  ( $c = 1.09$ ,  $\text{CHCl}_3$ ).  $^1\text{H}$  NMR (300 MHz,  $\text{CDCl}_3$ )  $\delta$  4.42 (d,  $J = 2.0$ , 1H, H-1), 4.03 – 3.65 (m, 5H, H-2/3/4/5), 3.51 (s, 3H,  $\text{OCH}_3$ ), 3.46 (s, 3H,  $\text{OCH}_3$ ), 2.39 (d,  $J = 5.1$ , 1H, OH), 1.40 (s, 6H,  $\text{C}(\text{CH}_3)_2$ ), 0.93 (s, 9H,  $\text{SiC}(\text{CH}_3)_3$ ), 0.09 (s, 6H,  $\text{Si}(\text{CH}_3)_2$ ).  $^{13}\text{C}$  NMR (75 MHz,  $\text{CDCl}_3$ )  $\delta$  104.1, 98.5, 71.3, 70.6, 70.0, 65.7, 64.5, 56.9, 55.5, 28.6, 25.8, 19.6, 18.2, -4.6, -4.8. IR ( $\text{cm}^{-1}$ ) 2930, 1463, 1379, 1137, 1080. ESI-HRMS  $m/z$  calcd. for  $\text{C}_{16}\text{H}_{34}\text{NaO}_6\text{Si}^+$ : 373.2017, obsd. 373.2055  $[\text{M}+\text{Na}]^+$ .

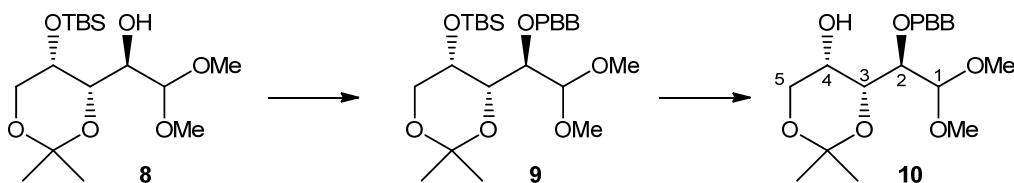

#### 3,5-*O*-Isopropylidene-2-*O*-*para*-bromobenzyl-L-lyxose dimethyl acetal (**10**):

To a solution of alcohol **8** (14.49 g, 42.3 mmol) in DMF (10 mL) was added *para*-bromobenzyl bromide (21.17 g, 84.7 mmol) and NaH (60% in oil, 5.08 g, 127 mmol) at  $0^\circ\text{C}$  and the resulting solution was stirred at rt for 18 h. The reaction mixture was quenched by water and extracted with EtOAc and the organic phase was washed with brine, and dried over  $\text{MgSO}_4$ , filtered and concentrated to give an oil that was purified by

flash chromatography (9:1 cyclohexane / EtOAc) to provide **9** as colorless oil (22.05 g). To a solution of **9** (524 mg, 1.00 mmol) in THF (10 mL) was added tetrabutylammonium fluoride trihydrate (636 mg, 2.01 mmol) at rt and the resulting solution was stirred at rt for 20 h. The reaction mixture was concentrated and was purified by flash chromatography (4:1 to 1:1 cyclohexane / EtOAc) to provide **10** as colorless oil (331 mg, 82%, over two steps).  $[\alpha]_D^{25} = +21.24$  ( $c = 0.89$ ,  $\text{CHCl}_3$ ).  $^1\text{H}$  NMR (300 MHz,  $\text{CDCl}_3$ )  $\delta$  7.43 (d,  $J = 6.3$  Hz, 2H,  $\text{CBr}-(\text{CH})_2$ ), 7.25 (d,  $J = 6.3$  Hz, 2H,  $\text{CBr}-(\text{CH})_2-(\text{CH})_2$ ), 4.81 (d,  $J = 11.3$  Hz, 1H,  $\text{OCH}_2(\text{C}_6\text{H}_4\text{Br})$ ), 4.66 (d,  $J = 11.3$ , 1H,  $\text{OCH}_2(\text{C}_6\text{H}_4\text{Br})$ ), 4.42 (d,  $J = 3.0$ , 1H, H-1), 4.05 – 3.62 (m, 5H, H-2/3/4/5), 3.50 (s, 3H,  $\text{OCH}_3$ ), 3.44 (s, 3H,  $\text{OCH}_3$ ), 3.08 (d,  $J = 8.7$  Hz, 1H, OH), 1.44 (s, 3H,  $\text{CCH}_3$ ), 1.43 (s, 3H,  $\text{CCH}_3$ ).  $^{13}\text{C}$  NMR (75 MHz,  $\text{CDCl}_3$ )  $\delta$  137.4, 131.3, 129.8, 121.5, 104.9, 98.9, 78.5, 74.5, 70.8, 65.9, 63.2, 56.9, 50.0, 29.6, 18.4. IR ( $\text{cm}^{-1}$ ) 3486, 2937, 1380, 1199, 1068. ESI-HRMS  $m/z$  calcd. for  $\text{C}_{17}\text{H}_{25}\text{BrNaO}_6^+$ : 427.0727, obsd. 427.0737  $[\text{M}+\text{Na}]^+$ .

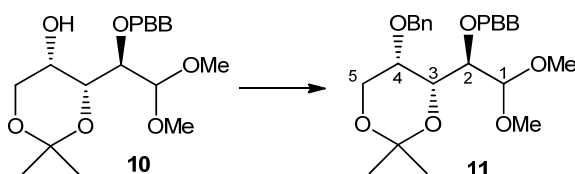

**4-*O*-Benzyl-3,5-*O*-isopropylidene-2-*O*-*para*-bromobenzyl-L-lyxose dimethyl acetal (**11**):**

To a solution of alcohol **10** (11.9 g, 29.3 mmol) in DMF (90 mL) was added benzyl bromide (7 mL, 58.6 mmol) and NaH (60% in oil, 2.46 g, 61.5 mmol) at 0 °C and the resulting solution was stirred at rt for 23 h. The reaction mixture was quenched with water and extracted with EtOAc and the organic phase was washed with brine, and dried over  $\text{MgSO}_4$ , filtered and concentrated to give an oil which was purified by flash chromatography (5:1 to 4:1 cyclohexane / EtOAc) to provide **11** as colorless oil (13.79 g, 95%).  $[\alpha]_D^{25} = +59.7$  ( $c = 0.45$ ,  $\text{CHCl}_3$ ).  $^1\text{H}$  NMR (400 MHz,  $\text{CDCl}_3$ )  $\delta$  7.73 – 7.20 (m, 7H, Ar), 7.10 (d,  $J = 8.7$  Hz, 2H,  $\text{CBr}-(\text{CH})_2-(\text{CH})_2$ ), 4.91 (d,  $J = 11.4$ , 1H,  $\text{OCH}_2\text{Ar}$ ), 4.65 (d,  $J = 12.3$  Hz, 1H,  $\text{OCH}_2\text{Ar}$ ), 4.50 (d,  $J = 1.5$ , 1H, H-1), 4.44 – 4.30 (m, 2H,  $\text{OCH}_2\text{Ar}$ ), 4.16 – 3.82 (m, 4H, H-2/3/5), 3.54 (s, 3H,  $\text{OCH}_3$ ), 3.49 (dd,  $J = 1.8$  Hz, 3.6 Hz, 1H, H-4), 3.47 (s, 3H,  $\text{OCH}_3$ ), 1.45 (s, 6H,  $\text{C}(\text{CH}_3)_2$ ).  $^{13}\text{C}$  NMR (101 MHz,  $\text{CDCl}_3$ )  $\delta$  138.2, 137.9, 131.1, 129.2, 128.3, 127.7, 127.6, 121.0, 105.6, 98.6, 76.9, 73.8, 70.8, 70.6, 69.3, 61.3, 57.4, 56.6, 29.2, 18.9. IR ( $\text{cm}^{-1}$ ) 2933, 1488, 1379, 1130, 1068. ESI-HRMS  $m/z$  calcd. for  $\text{C}_{24}\text{H}_{31}\text{BrNaO}_6^+$ : 517.1196, obsd. 517.1204  $[\text{M}+\text{Na}]^+$ .

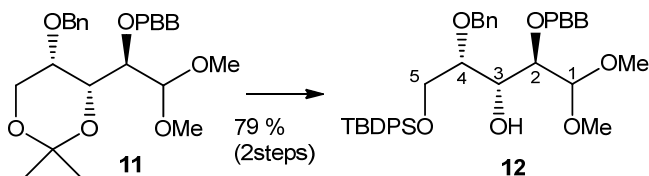

**4-*O*-Benzyl-2-*O*-*para*-bromobenzyl-5-*O*-*tert*-butyldiphenylsilyl-L-lyxose dimethyl acetal (**12**):**

To a solution of acetal **11** (4.83 g, 9.77 mmol) in MeOH (105 mL) *dl*-camphorsulfonic acid (113 mg, 0.45 mmol) was added at rt and the resulting solution was stirred at rt for 1 h. After checking the consumption of starting material, to the reaction mixture sat. aq.  $\text{NaHCO}_3$  (100 mL) and EtOAc (700 mL) was added and stirred vigorously to be

neutralized. After that, the organic layer was collected and washed with water, dried over  $\text{MgSO}_4$ , filtered and evaporated to give the diol as a crude product. The diol intermediate was dissolved with dichloromethane (50 mL) and imidazole (798 mg, 11.7 mmol) and *tert*-butyldiphenylsilyl chloride (3.07 mL, 11.7 mmol) and DMAP (407 mg, 2.93 mmol) was added and stirred at rt for 20 min. After checking for complete consumption of the diol, the reaction mixture was quenched with sat. aq.  $\text{NaHCO}_3$  and the resulting solution was worked up with EtOAc. The organic layer was washed with brine and dried over  $\text{MgSO}_4$ , filtered, and concentrated to give an oil that was purified by flash chromatography (9:1 to 4:1 cyclohexane / EtOAc) to provide **12** as colorless oil (6.275 g, 93%).  $[\alpha]_{\text{D}}^{25} = +48.39$  ( $c = 1.11$ ,  $\text{CHCl}_3$ ).  $^1\text{H}$  NMR (300 MHz,  $\text{CDCl}_3$ )  $\delta$  7.67–7.11 (m, 19H, Ar), 4.74 (d,  $J = 12$ , 1H,  $\text{OCH}_2\text{Ar}$ ), 4.64 (d,  $J = 11.7$ , 1H,  $\text{OCH}_2\text{Ar}$ ), 4.56 (d,  $J = 3.3$ , 1H, H-1), 4.27 (d,  $J = 11.7$ , 1H,  $\text{OCH}_2\text{Ar}$ ), 4.25 (d,  $J = 12$ , 1H,  $\text{OCH}_2\text{Ar}$ ), 3.89–3.54 (m, 5H, H-2/3/4/5), 3.51 (s, 3H,  $\text{OCH}_3$ ), 3.44 (s, 3H,  $\text{OCH}_3$ ), 2.97 (d,  $J = 5.9$ , 1H, OH), 1.06 (s, 9H,  $\text{SiC}(\text{CH}_3)_3$ ).  $^{13}\text{C}$  NMR (75 MHz,  $\text{CDCl}_3$ )  $\delta$  138.3, 137.7, 135.5, 133.1, 133.0, 131.2, 129.7, 129.2, 128.2, 127.7, 127.7, 127.6, 121.1, 106.1, 78.8, 77.1, 72.9, 72.2, 70.9, 63.8, 56.5, 56.0, 26.8, 19.1. IR ( $\text{cm}^{-1}$ ) 3499, 2931, 1427, 1104, 1068, 740, 700. ESI-HRMS  $m/z$  calcd. for  $\text{C}_{37}\text{H}_{45}\text{BrNaO}_6\text{Si}^+$ : 715.2061, obsd. 715.2073  $[\text{M}+\text{Na}]^+$ .

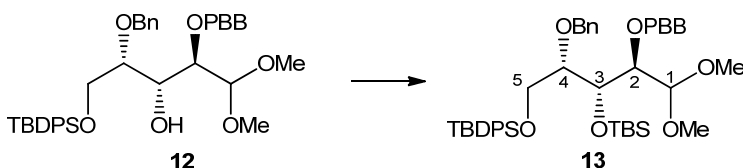

**4-*O*-Benzyl-2-*O*-*para*-bromobenzyl-3-*O*-*tert*-butyldimethylsilyl-5-*O*-*tert*-butyldiphenylsilyl-L-lyxose dimethyl acetal (**13**):**

To a solution of alcohol **12** (3.163 g, 4.56 mmol) in dichloromethane (50 mL) was added 2,6-lutidine (2.7 mL, 23.1 mmol) and *tert*-butyldimethylsilyl trifluoromethanesulfonate (5.2 mL, 23.1 mmol) at  $-78^\circ\text{C}$  and the reaction mixture was stirred at  $-78^\circ\text{C}$  for 10 min, warmed up to  $0^\circ\text{C}$  and stirred for 40 min. After checking for complete consumption of **12**, the reaction mixture was quenched with sat. aq.  $\text{NaHCO}_3$  and the resulting solution was worked up with EtOAc. The organic layer was washed with brine, and dried over  $\text{MgSO}_4$ , filtered, and concentrated to give an oil that was purified by flash chromatography (20:1 cyclohexane / EtOAc) to provide **13** as colorless oil (3.59 g, 97%).  $[\alpha]_{\text{D}}^{25} = 3.74$  ( $c = 0.54$ ,  $\text{CHCl}_3$ ).  $^1\text{H}$  NMR (400 MHz,  $\text{CDCl}_3$ )  $\delta$  7.70 – 7.02 (m, 19H, Ar), 4.69 (d,  $J = 12.0$ , 1H,  $\text{OCH}_2\text{Ar}$ ), 4.63 (d,  $J = 12.0$ , 1H,  $\text{OCH}_2\text{Ar}$ ), 4.57 – 4.48 (m, 3H,  $\text{OCH}_2\text{Ar}/\text{H}-1$ ), 4.24 (dd,  $J = 5.8$ , 2.1, 1H, H-2), 3.98–3.50 (m, 4H, H-3/4/5), 3.35 (s, 3H,  $\text{OCH}_3$ ), 3.25 (s, 3H,  $\text{OCH}_3$ ), 1.11 (s, 9H,  $\text{SiC}(\text{CH}_3)_3$ ), 0.76 (m, 9H,  $\text{SiC}(\text{CH}_3)_3$ ), 0.04 (s, 3H,  $\text{SiCH}_3$ ), 0.00 (s, 3H,  $\text{SiCH}_3$ ).  $^{13}\text{C}$  NMR (101 MHz,  $\text{CDCl}_3$ )  $\delta$  139.1, 137.9, 135.7, 135.6, 133.8, 133.7, 131.1, 129.5, 129.1, 128.1, 127.6, 127.5, 127.2, 120.9, 105.2, 83.2, 83.0, 73.8, 72.8, 72.4, 64.6, 55.8, 55.5, 26.9, 25.9, 19.2, 18.1,  $-4.7$ ,  $-4.8$ . IR ( $\text{cm}^{-1}$ ) 2930, 2856, 1488, 1471, 1428, 1389, 1361, 1253, 1072, 1011, 836, 776, 739, 701. MALDI-HRMS  $m/z$  calcd. for  $\text{C}_{43}\text{H}_{59}\text{BrO}_6\text{Si}_2\text{Na}^+$ : 829.2926, obsd. 829.2928  $[\text{M}+\text{Na}]^+$ .

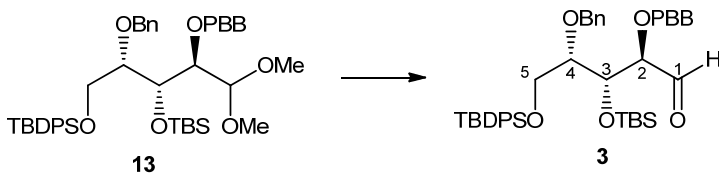

**4-*O*-Benzyl-2-*O*-*para*-bromobenzyl-3-*O*-*tert*-butyldimethylsilyl-5-*O*-*tert*-butyldiphenylsilyl-L-lyxose (3):**

To a solution of dimethyl acetal **13** (6.82 g, 8.43 mmol) in acetone (120 mL) was added pTsOH·H<sub>2</sub>O (160 mg, 0.83 mmol) and the reaction mixture was stirred at rt for 17 h. The reaction mixture was poured into EtOAc and sat. aq. NaHCO<sub>3</sub> and vigorously stirred. The organic layer was collected and washed with brine, and dried over MgSO<sub>4</sub>, filtered, and concentrated to provide **3** as colorless oil (6.24 g, 97%). The aldehyde was used in the next reaction without purification. <sup>1</sup>H NMR (300 MHz, CDCl<sub>3</sub>) δ 9.60 (d, *J* = 1.5, 1H, O=CH), 7.70–7.04 (m, 19H, Ar), 4.61 (m, 2H, OCH<sub>2</sub>Ar), 4.50 (d, *J* = 11.9, 1H, OCH<sub>2</sub>Ar), 4.39 (d, *J* = 11.9, 1H, OCH<sub>2</sub>Ar), 4.22–3.57 (m, 5H, H-2/3/4/5), 1.04 (s, 9H, SiC(CH<sub>3</sub>)<sub>3</sub>), 0.80 (s, 9H, SiC(CH<sub>3</sub>)<sub>3</sub>), 0.02 (s, 3H, SiCH<sub>3</sub>), -0.03 (s, 3H, SiCH<sub>3</sub>). MALDI-HRMS *m/z* calcd. for C<sub>41</sub>H<sub>53</sub>BrNaO<sub>5</sub>Si<sub>2</sub><sup>+</sup>: 783.2507, obsd. 783.2517 [M+Na]<sup>+</sup>.

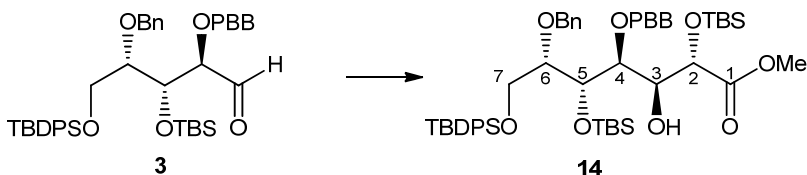

**Methyl 6-*O*-benzyl-4-*O*-*para*-bromobenzyl-2,5-di-*O*-*tert*-butyldimethylsilyl-7-*O*-*tert*-butyldiphenylsilyl-L-glycero-D-mannoate (14):**

Silyl enolether **4** (5.60 g, 20.2 mmol) was dissolved in toluene (40 mL) and MgBr<sub>2</sub>·OEt<sub>2</sub> (5.23 g, 20.2 mmol) was added. The solution was stirred for 20 min at rt and cooled to -78 °C. Aldehyde **3** (3.09 g, 4.05 mmol) in dichloromethane (40 mL) was added dropwise and stirred at -78 °C for 2 h. The reaction mixture was quenched with sat. aq. NaHCO<sub>3</sub> and the resulting solution was worked up with EtOAc. The organic layer was washed with brine, dried over MgSO<sub>4</sub>, filtered, and concentrated to give an oil that was purified by flash chromatography (20:1 to 10:1 cyclohexane / EtOAc) to provide **14** as colorless oil (4.99 g, 61%). [α]<sub>D</sub><sup>rt</sup> = +3.85 (c = 0.85, CHCl<sub>3</sub>). <sup>1</sup>H NMR (400 MHz, CDCl<sub>3</sub>) δ 7.60–6.99 (m, 19H, Ar), 4.77 (d, *J* = 12.0, 1H, OCH<sub>2</sub>Ar), 4.65 (d, *J* = 12.0, 1H, OCH<sub>2</sub>Ar), 4.64 (d, *J* = 11.8, 1H, OCH<sub>2</sub>Ar), 4.37 (d, *J* = 11.8, 1H, OCH<sub>2</sub>Ar), 4.19 (d, *J* = 8.2, 1H, H-2), 4.10–3.81 (m, 6H, H-3/4/5/6/7), 3.72 (s, 3H, OCH<sub>3</sub>), 1.05 (s, 9H, SiC(CH<sub>3</sub>)<sub>3</sub>), 0.83 (s, 9H, SiC(CH<sub>3</sub>)<sub>3</sub>), 0.82 (s, 9H, SiC(CH<sub>3</sub>)<sub>3</sub>), 0.01 (s, 3H, SiCH<sub>3</sub>), -0.02 (s, 3H, SiCH<sub>3</sub>), -0.05 (s, 3H, SiCH<sub>3</sub>), -0.07 (s, 3H, SiCH<sub>3</sub>). <sup>13</sup>C NMR (101 MHz, CDCl<sub>3</sub>) δ 173.1, 138.1, 137.5, 135.6, 135.6, 133.5, 133.4, 131.2, 129.6, 129.6, 128.5, 128.4, 127.8, 127.7, 127.6, 127.6, 120.9, 81.8, 78.9, 74.4, 73.3, 73.1, 73.0, 72.8, 64.5, 61.7, 51.8, 26.9, 25.8, 25.8, 25.7, 19.2, 18.0, 18.0, -4.8, -4.9, -5.1, 5.3. IR (cm<sup>-1</sup>) 2929, 1751, 1472, 1252, 1110, 836, 777, 700. ESI-HRMS *m/z* calcd. for C<sub>50</sub>H<sub>73</sub>BrNaO<sub>8</sub>Si<sub>3</sub><sup>+</sup>: 987.3694, obsd. 987.3718 [M+Na]<sup>+</sup>.

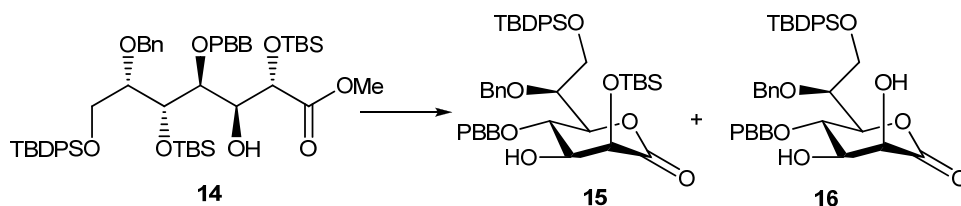

**6-*O*-Benzyl-4-*O*-*para*-bromobenzyl-2-*O*-*tert*-butyldimethylsilyl-7-*O*-*tert*-butyldiphenylsilyl-L-glycero-D-manno-heptopyrano-1,5-lactone (15) and 6-*O*-Benzyl-4-*O*-*para*-bromobenzyl-7-*O*-*tert*-butyldiphenylsilyl-L-glycero-D-manno-heptopyrano-1,5-lactone (16):**

To a solution of ester **14** (10.61 g, 8.19 mmol) in dichloromethane (150 mL) was added trifluoroacetic acid (10 mL) at rt and the solution was stirred at rt for 24 h. The reaction mixture was quenched with sat. aq. NaHCO<sub>3</sub> and the resulting solution was worked up with EtOAc. The organic layer was washed with brine, dried over MgSO<sub>4</sub>, filtered, and concentrated to give an oil which was purified by flash chromatography (15:1 to 10:1, then 1:1 cyclohexane / EtOAc) to provide the titled compounds **15** (3.78 g, 56%) and **16** (1.15 g, 20%). **15** [ $\alpha$ ]<sub>D</sub><sup>25</sup> = +36.0 (c = 0.93, CHCl<sub>3</sub>). <sup>1</sup>H NMR (400 MHz, CDCl<sub>3</sub>)  $\delta$  7.73 – 7.07 (m, 19H, Ar), 4.55 (d, *J* = 11.9, 1H, OCH<sub>2</sub>Ar), 4.54 (d, *J* = 11.9, 1H, OCH<sub>2</sub>Ar), 4.47 (d, *J* = 4.2, 1H, H-2), 4.41 (dd, *J* = 9.1, 2.2, 1H, H-5), 4.25 (d, *J* = 11.9, 1H, OCH<sub>2</sub>Ar), 4.11 (d, *J* = 11.9, 1H, OCH<sub>2</sub>Ar), 3.96 – 3.68 (m, 5H, H-3/4/6/7), 2.76 (s, 1H, OH), 1.05 (s, 9H, SiC(CH<sub>3</sub>)<sub>3</sub>), 0.93 (s, 9H, SiC(CH<sub>3</sub>)<sub>3</sub>), 0.23 (s, 3H, SiCH<sub>3</sub>), 0.12 (m, 3H, SiCH<sub>3</sub>). <sup>13</sup>C NMR (101 MHz, CDCl<sub>3</sub>)  $\delta$  169.6, 137.9, 136.3, 135.6, 135.5, 134.8, 133.2, 133.0, 131.6, 129.9, 129.7, 129.4, 128.4, 128.0, 127.8, 127.8, 127.8, 127.7, 121.9, 76.1, 76.0, 75.7, 73.2, 72.9, 70.7, 69.3, 61.7, 26.9, 26.6, 25.7, 19.2, 18.4, -4.5, -5.6. IR (cm<sup>-1</sup>) 2929, 1778, 1590, 1471, 1428, 1254, 1154, 1071, 838, 702. MALDI-HRMS *m/z* calcd. for C<sub>43</sub>H<sub>55</sub>BrNaO<sub>7</sub>Si<sup>+</sup>: 841.2562, obsd. 841.2578 [M+Na]<sup>+</sup>. **16**; [ $\alpha$ ]<sub>D</sub><sup>25</sup> = +65.62 (c = 1.16, CHCl<sub>3</sub>). <sup>1</sup>H NMR (700 MHz, CDCl<sub>3</sub>)  $\delta$  7.73 – 7.07 (m, 19H, Ar), 4.52 (d, *J* = 11.8, 1H, OCH<sub>2</sub>Ar), 4.51 (d, *J* = 11.8, 1H, OCH<sub>2</sub>Ar), 4.45 – 4.35 (m, 1H, H-5), 4.27 (d, *J* = 3.0, 1H, H-2), 4.16 (d, *J* = 11.9, 1H, OCH<sub>2</sub>Ar), 3.98 – 3.60 (m, 5H, H-3/4/6/7), 3.07 (s, 1H, OH), 1.06 (s, 9H, SiC(CH<sub>3</sub>)<sub>3</sub>). <sup>13</sup>C NMR (176 MHz, CDCl<sub>3</sub>)  $\delta$  172.6, 137.5, 136.0, 135.5, 135.5, 133.0, 132.9, 131.5, 129.9, 129.9, 129.4, 128.4, 128.2, 127.9, 127.8, 121.9, 76.3, 76.0, 75.6, 72.7, 70.8, 70.5, 68.3, 61.1, 26.8, 19.1. IR (cm<sup>-1</sup>) 3426, 2930, 1761, 1427, 1206, 1112, 1069, 701. ESI-HRMS *m/z* calcd. for C<sub>37</sub>H<sub>41</sub>BrNaO<sub>7</sub>Si<sup>+</sup>: 727.1703, obsd. 727.1745 [M+Na]<sup>+</sup>.

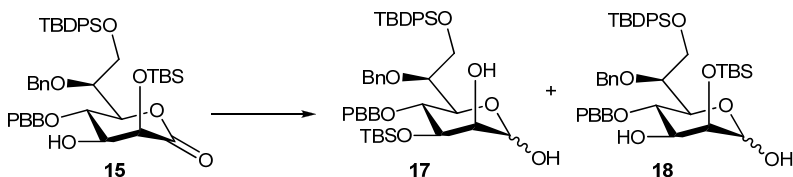

**6-*O*-Benzyl-4-*O*-*para*-bromobenzyl-3-*O*-*tert*-butyldimethylsilyl-7-*O*-*tert*-butyldiphenylsilyl-L-glycero- $\alpha/\beta$ -D-manno-heptopyranose (17) and 6-*O*-Benzyl-4-*O*-*para*-bromobenzyl-2-*O*-*tert*-butyldimethylsilyl-7-*O*-*tert*-butyldiphenylsilyl-L-glycero- $\alpha/\beta$ -D-manno-heptopyranose (18):**

To a solution of lactone **15** (3.609 g, 4.4 mmol) in THF (72 mL) was added lithium tri-*tert*-butoxyaluminum hydride (2.538 g, 9.68 mmol) at -15 °C and the reaction mixture was stirred at -15 °C for 1 h. The reaction mixture was quenched with aqueous solution of Rochelle salt and the resulting solution was worked up with EtOAc. The organic layer was washed with brine, and dried over MgSO<sub>4</sub>, filtered and concentrated to give an oil which was purified by flash chromatography (10:1 to 4:1 cyclohexane / EtOAc) to provide lactol **17** (1.68 g, 47%) and lactol **18** (1.36 g, 38%). **17**  $[\alpha]_D^{25} = +39.8$  ( $c = 0.53$ , CHCl<sub>3</sub>). <sup>1</sup>H NMR (300 MHz, CDCl<sub>3</sub>)  $\delta$  7.74 – 7.07 (m, 19H, Ar), 5.16 (s, 1H, H-1), 4.72 – 4.61 (m, 2H, H-5/OCH<sub>2</sub>Ar), 4.28 (d,  $J = 12.1$ , 1H, OCH<sub>2</sub>Ar), 4.17 – 3.61 (m, 8H, H-2/3/4/6/7/OCH<sub>2</sub>Ar), 2.05 (s, 1H, OH), 1.07 (s, 9H, SiC(CH<sub>3</sub>)<sub>3</sub>), 0.90 (s, 9H, SiC(CH<sub>3</sub>)<sub>3</sub>), 0.10 (s, 3H, SiCH<sub>3</sub>), 0.03 (s, 3H, SiCH<sub>3</sub>). <sup>13</sup>C NMR (176 MHz, CDCl<sub>3</sub>)  $\delta$  138.4, 138.3, 138.0, 137.8, 135.7, 135.6, 133.5, 133.4, 131.3, 131.2, 129.8, 129.8, 129.7, 128.3, 128.2, 127.9, 127.8, 127.8, 127.8, 127.7, 127.7, 127.6, 127.5, 120.8, 93.6, 76.6, 76.3, 76.0, 75.2, 74.7, 73.4, 73.3, 73.2, 72.3, 72.1, 71.7, 69.8, 62.2, 61.9, 26.9, 25.8, 25.8, 25.7, 19.2, 19.2, 18.0, 17.9, -4.6, -4.6, -4.7. IR (cm<sup>-1</sup>) 3447, 2930, 1427, 1254, 1110, 1069, 837, 702. MALDI-HRMS  $m/z$  calcd. for C<sub>43</sub>H<sub>57</sub>BrNaO<sub>7</sub>Si<sub>2</sub><sup>+</sup>: 843.2718, obsd. 843.2721 [M+Na]<sup>+</sup>. **18**  $[\alpha]_D^{25} = +24.2$  ( $c = 0.5$ , CHCl<sub>3</sub>). <sup>1</sup>H NMR (300 MHz, CDCl<sub>3</sub>)  $\delta$  7.74 – 7.11 (m, 19H, Ar), 4.99 (s, 1H, H-1), 4.79 – 4.65 (m, 2H, H-5/OCH<sub>2</sub>Ar), 4.31 (d,  $J = 11.9$ , 1H, OCH<sub>2</sub>Ar), 4.20 (d,  $J = 11.9$ , 1H, OCH<sub>2</sub>Ar), 4.05 – 3.72 (m, 7H, H-2/3/4/6/7/OCH<sub>2</sub>Ar), 1.96 (s, 1H, OH), 1.06 (d,  $J = 6.4$ , 9H, SiC(CH<sub>3</sub>)<sub>3</sub>), 0.94 (s, 9H, SiC(CH<sub>3</sub>)<sub>3</sub>), 0.11 (s, 3H, SiCH<sub>3</sub>), 0.08 (s, 3H, SiCH<sub>3</sub>). <sup>13</sup>C NMR (176 MHz, CDCl<sub>3</sub>)  $\delta$  138.8, 137.9, 135.7, 135.7, 135.6, 135.6, 133.6, 133.5, 131.5, 131.3, 129.8, 129.7, 129.2, 129.1, 128.4, 128.2, 128.2, 127.8, 127.7, 127.7, 127.3, 127.3, 127.2, 121.2, 110.0, 94.7, 94.3, 75.9, 74.9, 74.6, 73.8, 73.2, 73.1, 72.9, 72.3, 72.2, 71.9, 71.7, 69.8, 62.4, 62.0, 26.9, 26.9, 26.0, 25.8, 25.7, 19.2, 18.4, 18.1, -4.3, -4.5, -4.6, -5.0. IR (cm<sup>-1</sup>) 3450, 2930, 1428, 1255, 1120, 836, 702. MALDI-HRMS  $m/z$  calcd. for C<sub>43</sub>H<sub>57</sub>BrNaO<sub>7</sub>Si<sub>2</sub><sup>+</sup>: 843.2718, obsd. 843.2702 [M+Na]<sup>+</sup>.

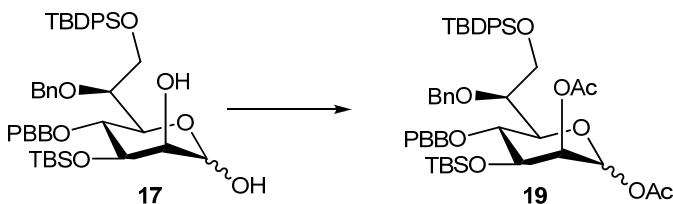

**2-*O*-Acetyl-6-*O*-benzyl-4-*O*-para-bromobenzyl-3-*O*-tert-butyldimethylsilyl-7-*O*-tert-butyldiphenylsilyl-L-glycero- $\alpha/\beta$ -D-manno-heptopyranosyl acetate (**19**):**

To a solution of diol **17** (383 mg, 0.47 mmol) in dichloromethane (5 mL) was added triethylamine (0.36 mL, 2.58 mmol), acetic anhydride (0.22 mL, 2.3 mmol) and DMAP (11 mg, 0.09 mmol) at rt. After stirring for 19 h, the reaction mixture was quenched with water and the resulting solution was worked up with EtOAc. The organic layer was washed with brine, and dried over MgSO<sub>4</sub>, filtered and concentrated to give an oil that was purified by flash chromatography (8:1 cyclohexane / EtOAc) to provide **19** (423 mg, quant.) as a white foam.  $[\alpha]_D^{25} = +41.98$  ( $c = 1.0$ , CHCl<sub>3</sub>). <sup>1</sup>H NMR (400 MHz, CDCl<sub>3</sub>)  $\delta$  7.70 – 7.07 (m, 19H, Ar), 6.12 (d,  $J = 2.0$ , 1H, H-1), 5.11 – 4.99 (m, 1H, H-2), 4.75 (d,  $J = 12.1$ , 1H, OCH<sub>2</sub>Ar), 4.58 (d,  $J = 12.1$ , 1H, OCH<sub>2</sub>Ar), 4.24 – 3.71 (m, 8H, H-3/4/5/6/7/OCH<sub>2</sub>Ar), 2.14 (s, 3H, C(O)CH<sub>3</sub>), 2.01 (s, 3H, C(O)CH<sub>3</sub>), 1.05 (s, 9H, SiC(CH<sub>3</sub>)<sub>3</sub>), 0.88 (s, 9H, SiC(CH<sub>3</sub>)<sub>3</sub>), 0.10 (s, 3H, SiCH<sub>3</sub>), 0.03 (s, 3H, SiCH<sub>3</sub>). <sup>13</sup>C NMR (101 MHz, CDCl<sub>3</sub>)  $\delta$  170.0, 168.1, 138.3, 137.8, 135.6, 135.5, 133.3, 133.2, 131.3, 129.8, 129.8, 128.3, 128.3, 128.1, 127.8, 127.7, 127.7, 127.6, 121.0, 91.1, 76.3, 75.1, 73.4, 72.2, 72.1, 71.4, 71.3, 61.3, 26.8, 25.7, 20.9, 20.8, 19.2, 17.8, -4.7, -4.8. IR(cm<sup>-1</sup>) 2930, 1750, 1368, 1216, 1106, 837, 701. MALDI-HRMS  $m/z$  calcd. for C<sub>47</sub>H<sub>61</sub>BrNaO<sub>9</sub>Si<sub>2</sub><sup>+</sup>: 927.2919, obsd. 929.2916 [M+Na]<sup>+</sup>.

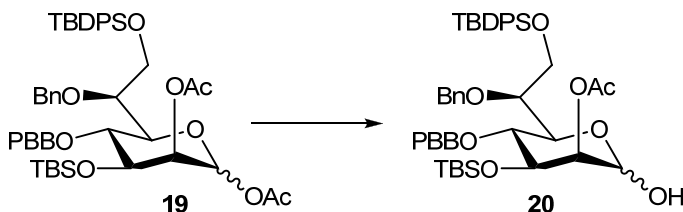

**2-*O*-Acetyl-6-*O*-benzyl-4-*O*-para-bromobenzyl-3-*O*-tert-butyldimethylsilyl-7-*O*-tert-butyldiphenylsilyl-L-glycero- $\alpha/\beta$ -D-manno-heptopyranose (**20**):**

To a solution of diacetate **19** (55 mg, 0.06 mmol) in DMF (0.5 mL) was added hydrazine acetate (22 mg, 0.238 mmol). After stirring for 13 h, the reaction mixture was quenched with sat. aq. NaHCO<sub>3</sub> and the resulting solution was worked up with EtOAc. The organic layer was washed with brine, and dried over MgSO<sub>4</sub>, filtered and concentrated to give an oil which was purified by flash chromatography (5:1 cyclohexane / EtOAc) to provide **20** (46mg, 89%) as a colorless oil.  $[\alpha]_D^{25} = +28.7$  ( $c = 1.01$ , CHCl<sub>3</sub>). <sup>1</sup>H NMR (400 MHz, CDCl<sub>3</sub>)  $\delta$  7.75 – 7.08 (m, 19H, Ar), 5.09 – 5.06 (m, 1H, H-1), 5.03 – 4.97 (m, 1H, H-2), 4.77 (d,  $J = 12.2$ , 1H, OCH<sub>2</sub>Ar), 4.69 (d,  $J = 12.0$ , 1H, OCH<sub>2</sub>Ar), 4.27 (d,  $J = 12.0$ , 1H, OCH<sub>2</sub>Ar), 4.19 (dd,  $J = 9.0, 3.4$ , 1H, H-5), 4.10 (d,  $J = 12.2$ , 1H, OCH<sub>2</sub>Ar), 4.02– 3.69 (m, 5H, H-3/4/6/7), 2.29 (d,  $J = 3.7$ , 1H, OH), 2.13 (s, 3H, C(O)CH<sub>3</sub>), 1.08 (s, 9H, SiC(CH<sub>3</sub>)<sub>3</sub>), 0.86 (s, 9H, SiC(CH<sub>3</sub>)<sub>3</sub>), 0.10 (s, 3H, SiCH<sub>3</sub>), 0.01 (s, 3H, SiCH<sub>3</sub>). <sup>13</sup>C NMR (176 MHz, CDCl<sub>3</sub>)  $\delta$  170.5, 138.5, 138.0, 135.7, 135.6, 133.4, 133.4, 131.3, 131.2, 129.8, 128.2, 128.2, 128.1, 127.8, 127.7, 127.7, 127.6, 120.8, 92.2, 76.7, 75.5, 73.3, 72.7, 72.5, 70.9, 70.1, 62.2, 26.9, 25.7, 21.0, 19.2, 17.8, -4.7, -4.9. IR(cm<sup>-1</sup>) 3417, 2930, 1748, 1472, 1239, 1112, 1069, 837, 701. ESI-HRMS  $m/z$  calcd. for C<sub>45</sub>H<sub>59</sub>BrNaO<sub>8</sub>Si<sub>2</sub><sup>+</sup>: 887.2809, obsd. 887.2812 [M+Na]<sup>+</sup>.



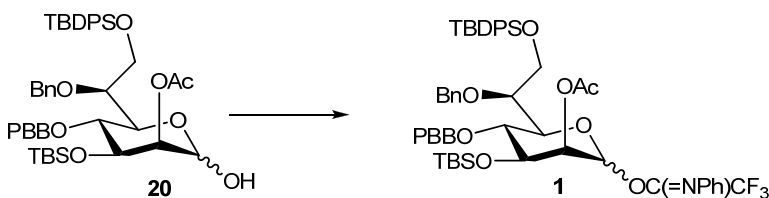

**2-*O*-Acetyl-6-*O*-benzyl-4-*O*-*para*-bromobenzyl-3-*O*-*tert*-butyldimethylsilyl-7-*O*-*tert*-butyldiphenylsilyl-*L*-glycero- $\alpha/\beta$ -D-manno-heptopyranosyl *N*-phenyl trifluoroacetimidate (**1**):**

To a solution of lactol **20** (46 mg, 0.053 mmol) in dichloromethane (0.8 mL) was added *N*-phenyl-trifluoroacetimidoyl chloride (33 mg, 0.158 mmol) and Cs<sub>2</sub>CO<sub>3</sub> (35 mg, 0.107 mmol) at rt. After stirring for 1 h, the reaction mixture was concentrated. The residue was purified by flash SiO<sub>2</sub> chromatography (9:1 cyclohexane / EtOAc) to provide **1** (53 mg, 96%) as a colorless oil.  $[\alpha]_D^{25} = +55$  (*c* = 1.2, CHCl<sub>3</sub>). <sup>1</sup>H NMR (400 MHz, CDCl<sub>3</sub>)  $\delta$  7.72–6.67 (m, 24H, Ar), 6.15 (s, 1H, H-1), 5.19 (s, 1H, H-2), 4.70 (d, *J* = 12.1, 1H, OCH<sub>2</sub>Ar), 4.55 (d, *J* = 12.1, 1H, OCH<sub>2</sub>Ar), 4.26–3.70 (m, 8H, H-3/4/5/6/7/OCH<sub>2</sub>Ar), 2.12 (d, *J* = 10.9, 3H, C(O)CH<sub>3</sub>), 1.03 (s, 9H, SiC(CH<sub>3</sub>)<sub>3</sub>), 0.83 (s, 9H, SiC(CH<sub>3</sub>)<sub>3</sub>), 0.08 (s, 3H, SiCH<sub>3</sub>), 0.00 (s, 3H, SiCH<sub>3</sub>).; <sup>13</sup>C NMR (101 MHz, CDCl<sub>3</sub>)  $\delta$  170.4, 170.0, 143.3, 138.5, 137.7, 135.7, 135.6, 135.5, 133.4, 133.3, 133.2, 131.3, 129.9, 129.8, 129.7, 129.4, 128.7, 128.3, 128.2, 128.2, 127.8, 127.8, 127.6, 127.5, 127.5, 124.3, 121.0, 120.4, 119.3, 94.8, 94.1, 76.6, 76.5, 75.3, 74.8, 73.7, 73.5, 73.4, 72.9, 72.1, 71.2, 70.9, 69.8, 62.5, 62.4, 26.9, 26.8, 26.8, 25.7, 25.6, 20.8, 20.7, 19.2, 19.1, 17.8, 17.8, -4.7, -4.9, -5.0. IR (cm<sup>-1</sup>) 2931, 1752, 1718, 1598, 1209, 1112, 701. MALDI-HRMS *m/z* calcd. for C<sub>53</sub>H<sub>63</sub>BrF<sub>3</sub>NNaO<sub>8</sub>Si<sub>2</sub><sup>+</sup>: 1058.3112, obsd. 1058.3119 [M+Na]<sup>+</sup>.

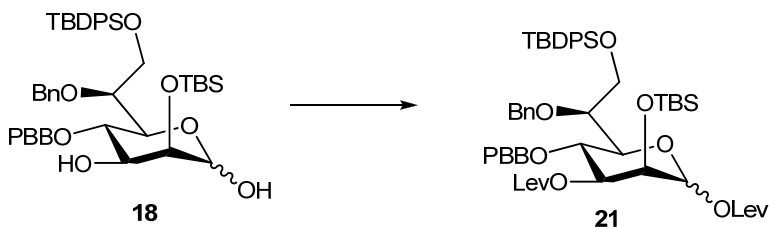

**6-*O*-Benzyl-3-*O*-levulinoyl-4-*O*-*para*-bromobenzyl-2-*O*-*tert*-butyldimethylsilyl-7-*O*-*tert*-butyldiphenylsilyl-*L*-glycero- $\alpha/\beta$ -D-manno-heptopyranosyl levulinoate (**18**):**

Levulinic acid (104 mg, 0.90 mmol) was dissolved in dichloromethane (3 mL) and the solution was cooled to 0 °C. *N,N*-diisopropylcarbodiimide (113 mg, 0.90 mmol) and DMAP (109 mg, 0.90 mmol) was successively added and the solution was stirred at 0 °C for 10 min. To this solution was added diol **18** (147 mg, 0.179 mmol) in dichloromethane (2 mL) and the resulting reaction mixture was stirred at rt for 19 h. Upon complete consumption of compound **18**, water was added to the resulting solution and the reaction mixture was extracted with EtOAc. The organic phase was washed with brine, dried over MgSO<sub>4</sub>, filtered and concentrated to give an oil that was purified by flash chromatography (7:3 cyclohexane / EtOAc) to provide **21** as colorless oil (160 mg, 88%).  $[\alpha]_D^{25} = +37.5$  (*c* = 1.00, CHCl<sub>3</sub>). <sup>1</sup>H NMR (400 MHz, CDCl<sub>3</sub>)  $\delta$  7.70–7.06 (m, 19H, Ar), 5.95 (d, *J* = 2.3, 1H, H-1), 5.20 (dd, *J* = 9.2, 2.9, 1H, H-3), 4.67 (d, *J* = 12.1, 1H, OCH<sub>2</sub>Ar), 4.47 (d, *J* = 11.9, 1H, OCH<sub>2</sub>Ar), 4.26–3.81 (m, 8H, H-2/4/5/6/7/OCH<sub>2</sub>Ar), 4.06 (s, 1H), 4.04–3.99 (m, 1H), 3.97–3.86 (m, 2H), 3.81 (t, *J* = 6.6, 1H), 2.75–2.34 (m, 8H, C(O)CH<sub>2</sub>), 2.15 (s, 3H, C(O)CH<sub>3</sub>), 2.11 (s, 3H, C(O)CH<sub>3</sub>), 1.05 (s, 9H,

SiC(CH<sub>3</sub>)<sub>3</sub>, 0.92 (s, 9H, SiC(CH<sub>3</sub>)<sub>3</sub>), 0.08 (s, 3H, SiCH<sub>3</sub>), 0.06 (s, 3H, SiCH<sub>3</sub>). <sup>13</sup>C NMR (101 MHz, CDCl<sub>3</sub>) δ 206.0, 205.8, 172.1, 170.8, 138.7, 137.5, 135.6, 135.5, 133.4, 133.6, 131.3, 129.8, 129.7, 129.0, 128.2, 127.8, 127.4, 127.3, 121.3, 94.4, 76.5, 74.5, 73.1, 72.9, 72.6, 71.9, 69.1, 61.7, 37.7, 29.8, 29.7, 28.1, 27.9, 26.8, 25.7, 19.2, 18.0, -4.7, -5.2. IR(cm<sup>-1</sup>) 2930, 2857, 1741, 1719, 1359, 1135, 1105, 956, 835. MALDI-HRMS m/z calcd. for C<sub>53</sub>H<sub>69</sub>BrNaO<sub>11</sub>Si<sub>2</sub><sup>+</sup>: 1039.3454, obsd. 1041.3449 [M+Na]<sup>+</sup>.

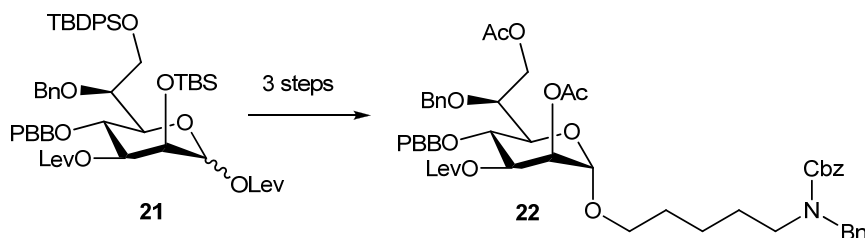

***N*-Benzyl-benzyloxycarbonyl-5-aminopentyl 2,7-*O*-di-acetyl-6-*O*-benzyl-3-*O*-levulinoyl-4-*O*-*para*-bromobenzyl-*L*-glycero- $\alpha$ -*D*-manno-heptopyranoside (**22**):**

To a solution of levulinoate **21** (46 mg, 0.045 mmol) and *N*-(benzyl)benzyloxycarbonyl-5-amino-pentane-1-ol (18 mg, 0.055 mmol) in dichloromethane (0.5 mL) was added borontrifluoride diethylether complex (11  $\mu$ L, 0.089 mmol) at 0 °C. After stirring for 11 h at rt, the reaction mixture was quenched with water, sat. aq. NaHCO<sub>3</sub> and the resulting solution was worked up with EtOAc. The organic layer was washed with brine, dried over MgSO<sub>4</sub>, filtered and concentrated to give an oil. Without purification, the residue was dissolved in THF (1 mL) and 70% HF-pyridine (0.1 mL) was added at rt. After stirring for 6 days, the reaction mixture was carefully quenched with sat. aq. NaHCO<sub>3</sub> and the resulting solution was worked up with EtOAc. The organic layer was washed with brine, and dried over MgSO<sub>4</sub>, filtered and concentrated to give the corresponding 2,7-diol as an oil. And without purification, the diol was treated with acetic anhydride (0.1 mL) and pyridine (0.5 mL) and the reaction mixture was stirred at rt for 16h. The reaction mixture was quenched with sat. aq. NaHCO<sub>3</sub> and the resulting solution was worked up with EtOAc. The organic layer was washed with brine, dried over MgSO<sub>4</sub>, filtered and concentrated to give an oil which was purified by flash chromatography (7:3 to 1:1 cyclohexane / EtOAc) to provide **22** (33 mg, 76%, 3 steps). [ $\alpha$ ]<sub>D</sub><sup>25</sup> = +40.3 (c = 1.00, CHCl<sub>3</sub>). <sup>1</sup>H NMR (700 MHz, CDCl<sub>3</sub>) δ 7.53 – 6.96 (m, 19H), 5.36 (dd, *J* = 9.7, 2.8 Hz, 1H, H-2), 5.25 – 5.11 (m, 4H, H-1/3/7), 4.84 (d, *J* = 11.9, 1H, OCH<sub>2</sub>Ar), 4.80 (brs, 1H, OCH<sub>2</sub>Ar), 4.61 – 4.42 (m, 5H, OCH<sub>2</sub>Ar), 4.28 – 3.15 (m, 5H, H-4/5/6/OCH<sub>2</sub>C), 2.81 – 2.54 (m, 2H, NCH<sub>2</sub>C), 2.34 – 1.75 (m, 13H, OCH<sub>3</sub>, C(O)CH<sub>2</sub>), 1.60 – 1.16 (m, 6H, CCH<sub>2</sub>C). <sup>13</sup>C NMR (176 MHz, CDCl<sub>3</sub>) δ 206.1, 206.0, 171.8, 171.6, 170.4, 170.0, 156.6, 156.0, 137.8, 137.7, 137.1, 136.8, 131.4, 131.3, 128.9, 128.9, 128.8, 128.7, 128.4, 128.4, 128.3, 127.9, 127.7, 127.1, 121.4, 97.4, 90.6, 73.4, 73.4, 73.2, 73.1, 72.9, 72.8, 72.5, 72.4, 72.3, 72.1, 72.1, 70.5, 69.8, 68.5, 67.8, 67.0, 62.4, 62.3, 50.5, 50.1, 46.9, 46.0, 37.6, 37.6, 29.7, 29.7, 29.6, 29.6, 28.9, 27.8, 27.7, 27.7, 27.4, 23.3, 20.9, 20.7, 20.7, 14.0. IR(cm<sup>-1</sup>) 2936, 1745, 1697, 1366, 1229, 1069, 751. ESI-HRMS m/z calcd. for C<sub>50</sub>H<sub>58</sub>BrNNaO<sub>13</sub><sup>+</sup>: 982.2984, obsd. 982.2951 [M+Na]<sup>+</sup>.

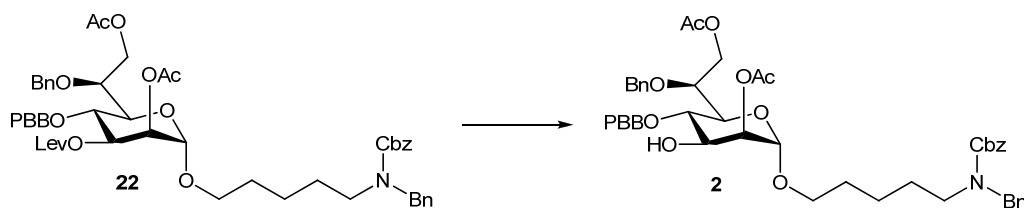

***N*-Benzyl-benzyloxycarbonyl-5-aminopentyl 2,7-*O*-di-acetyl-6-*O*-benzyl-4-*O*-para-bromobenzyl-*L*-glycero- $\alpha$ -D-manno-heptopyranoside (2):**

To a solution of **22** (33 mg, 0.034 mmol) in DMF (0.7 mL) was added hydrazine acetate (3.5 mg, 0.038 mmol) at rt. After stirring for 19 h at rt, the reaction mixture was quenched with sat. aq. NaHCO<sub>3</sub> and the resulting solution was worked up with EtOAc. The organic layer was washed with brine, dried over MgSO<sub>4</sub>, filtered and concentrated to give an oil, which was purified by flash chromatography (7:3 to 1:1 cyclohexane / EtOAc) to provide **2** (25 mg, 85%).  $[\alpha]_{\text{D}}^{25} = +52.4$  ( $c = 0.20$ , CHCl<sub>3</sub>). <sup>1</sup>H NMR (400 MHz, CDCl<sub>3</sub>)  $\delta$  7.48 – 7.07 (m, 19H), 5.16 (m, 2H, H-1/2), 5.03 (bs, 2H, H-7), 4.83 (s, 1H, OCH<sub>2</sub>Ar), 4.81 (d,  $J = 15.0$ , 1H, OCH<sub>2</sub>Ar), 4.74 (d,  $J = 15.0$ , 1H, OCH<sub>2</sub>Ar), 4.55 – 3.10 (m, 11H, H-3/4/5/6/ OCH<sub>2</sub>C/OCH<sub>2</sub>Ar), 2.81 – 2.54 (m, 2H, NCH<sub>2</sub>C), 2.34 – 1.75 (m, 6H, OCH<sub>3</sub>), 1.65 – 1.17 (m, 6H, CCH<sub>2</sub>C). <sup>13</sup>C NMR (101 MHz, CDCl<sub>3</sub>)  $\delta$  171.0, 170.6, 170.5, 169.9, 138.0, 137.9, 137.4, 136.8, 131.5, 129.1, 129.0, 128.9, 128.5, 128.4, 128.1, 128.0, 127.9, 127.9, 127.8, 127.3, 121.5, 97.3, 75.4, 73.7, 73.6, 72.8, 72.6, 71.1, 70.5, 67.8, 67.2, 62.8, 50.5, 50.4, 47.1, 46.2, 31.9, 29.7, 29.0, 26.9, 23.4, 22.7, 21.1, 20.9. IR (cm<sup>-1</sup>) 2924, 1743, 1698, 1234, 1070, 699. ESI-HRMS  $m/z$  calcd. for C<sub>45</sub>H<sub>52</sub>BrNNaO<sub>11</sub><sup>+</sup>: 884,2616, obsd. 884.2612 [M+Na]<sup>+</sup>.

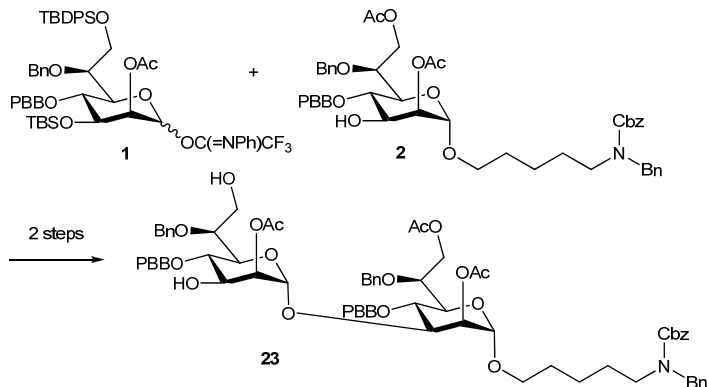

***N*-Benzyl-benzyloxycarbonyl-5-aminopentyl (2-*O*-acetyl-6-*O*-benzyl-4-*O*-para-bromobenzyl-*L*-glycero- $\alpha$ -D-manno-heptopyranosyl)-(1 $\rightarrow$ 3)-2,7-di-*O*-acetyl-6-*O*-benzyl-4-*O*-para-bromobenzyl-*L*-glycero- $\alpha$ -D-manno-heptopyranoside (23):**

To a solution of alcohol **2** (16 mg, 0.0185 mmol) and imidate **1** (25 mg, 0.024 mmol) in dichloromethane (0.2 mL) was added TMSOTf (2  $\mu$ L, 0.01 mmol) at -20 °C and the temperature of the solution was warmed up to 0 °C over 30 min. The reaction mixture was quenched with triethylamine, concentrated and the residue was purified by flash chromatography (5:1 to 1:1 cyclohexane / EtOAc) to provide the crude product (31 mg). The crude product was dissolved in THF (0.5 mL) and 70 % HF-pyridine (43  $\mu$ L, 0.367 mmol) was added at rt. After stirring for 18h, the reaction mixture was neutralized with sat. aq. NaHCO<sub>3</sub> carefully and the solution was extracted with EtOAc. The organic layer

was washed with brine, dried over  $\text{MgSO}_4$ , filtered and concentrated to give an oil, that was purified by size exclusion recycling HPLC ( $\text{CHCl}_3$ , eluting solvent) to provide disaccharide **23** (7 mg, 28%).  $[\alpha]_{\text{D}}^{25} = +35.6$  ( $c = 0.33$ ,  $\text{CHCl}_3$ );  $^1\text{H}$  NMR (500 MHz,  $\text{CDCl}_3$ )  $\delta$  7.51 – 6.80 (m, 28H), 5.26 – 5.00 (m, 4H), 4.91 – 4.72 (m, 3H), 4.63 – 4.30 (m, 6H), 4.29 – 3.50 (m, 13H), 3.44 – 3.02 (m, 3H), 2.19 – 1.95 (m, 9H), 1.65 – 1.11 (m, 6H).  $^{13}\text{C}$  NMR (126 MHz,  $\text{CDCl}_3$ )  $\delta$  170.6, 170.5, 170.2, 137.8, 137.4, 137.0, 136.9, 131.6, 131.5, 131.4, 131.4, 131.3, 129.0, 128.9, 128.9, 128.8, 128.8, 128.5, 128.5, 128.4, 128.3, 128.1, 128.0, 127.9, 127.9, 127.7, 127.7, 127.3, 127.2, 121.6, 121.4, 98.1, 97.3, 73.9, 73.4, 73.3, 72.8, 72.8, 72.6, 72.1, 71.9, 71.3, 70.9, 69.3, 67.6, 67.3, 62.6, 62.6, 50.1, 47.0, 29.7, 29.1, 27.5, 23.3, 21.1, 20.9. IR( $\text{cm}^{-1}$ ) 2929, 1743, 1696, 1233, 1069, 752. MALDI-HRMS  $m/z$  calcd. for  $\text{C}_{68}\text{H}_{77}\text{Br}_2\text{NNaO}_{18}$ : 1378.3390, obsd. 1378.3396  $[\text{M}+\text{Na}]^+$ .

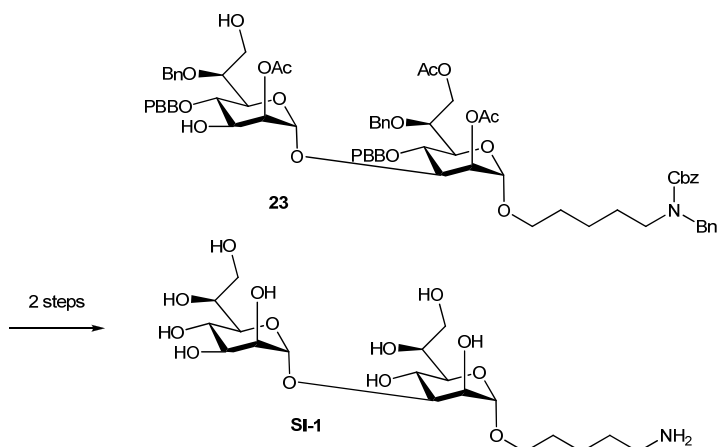

### 5-Aminopentyl-L-glycero- $\alpha$ -D-manno-heptopyranosyl-L-glycero- $\alpha$ -D-manno-heptopyranoside (SI-1):

For analytical purposes, disaccharide **21** (2.5 mg, 1.8  $\mu\text{mol}$ ) was dissolved in a solution of NaOMe in methanol (1.6  $\mu\text{M}$ , 1.5 mL) and stirred overnight. The reaction was then diluted in with 9:1 dichloromethane/methanol, neutralized with amberlite IR-120 and filtered through a pad of silica. Solvents were removed in vacuo and the crude residue was dissolved in 2:1:1 MeOH/THF/water (2 mL). AcOH was added (20  $\mu\text{L}$ ) followed by Pd/C (8 mg). The suspension was sonicated under argon flow for 30 minutes then under  $\text{H}_2$  flow for 30 minutes and stirred at rt for two days. The suspension was filtered through a pad of celite and lyophilized. The crude residue was purified by HPLC, 0  $\rightarrow$  20% acetonitrile (0.1% TFA), water (0.1% TFA) on a Pyramid C-18 Nucleodur column affording deprotected disaccharide **SI-1**.  $^1\text{H}$  NMR (600 MHz,  $\text{d}_2\text{O}$ )  $\delta$  4.01 – 3.96 (m, 3H), 3.94 (s, 1H), 3.91 (d,  $J = 10.0$  Hz, 1H), 3.84 – 3.80 (m,  $J = 12.1, 6.7$  Hz, 3H), 3.70 – 3.63 (m,  $J = 17.8, 10.9, 5.2$  Hz, 3H), 3.63 – 3.58 (m,  $J = 7.1, 5.3, 2.2$  Hz, 3H), 3.54 (d,  $J = 9.4$  Hz, 1H), 3.49 – 3.42 (m, 3H), 2.94 (t, 2H), 1.68 – 1.55 (m, 4H), 1.45 – 1.34 (m, 2H). ESI-HRMS  $m/z$  calcd. for  $\text{C}_{19}\text{H}_{37}\text{NNaO}_{13}$ : 510.2157, obsd. 510.2179  $[\text{M}+\text{Na}]^+$ .

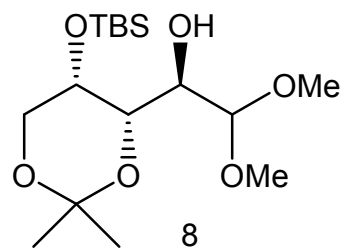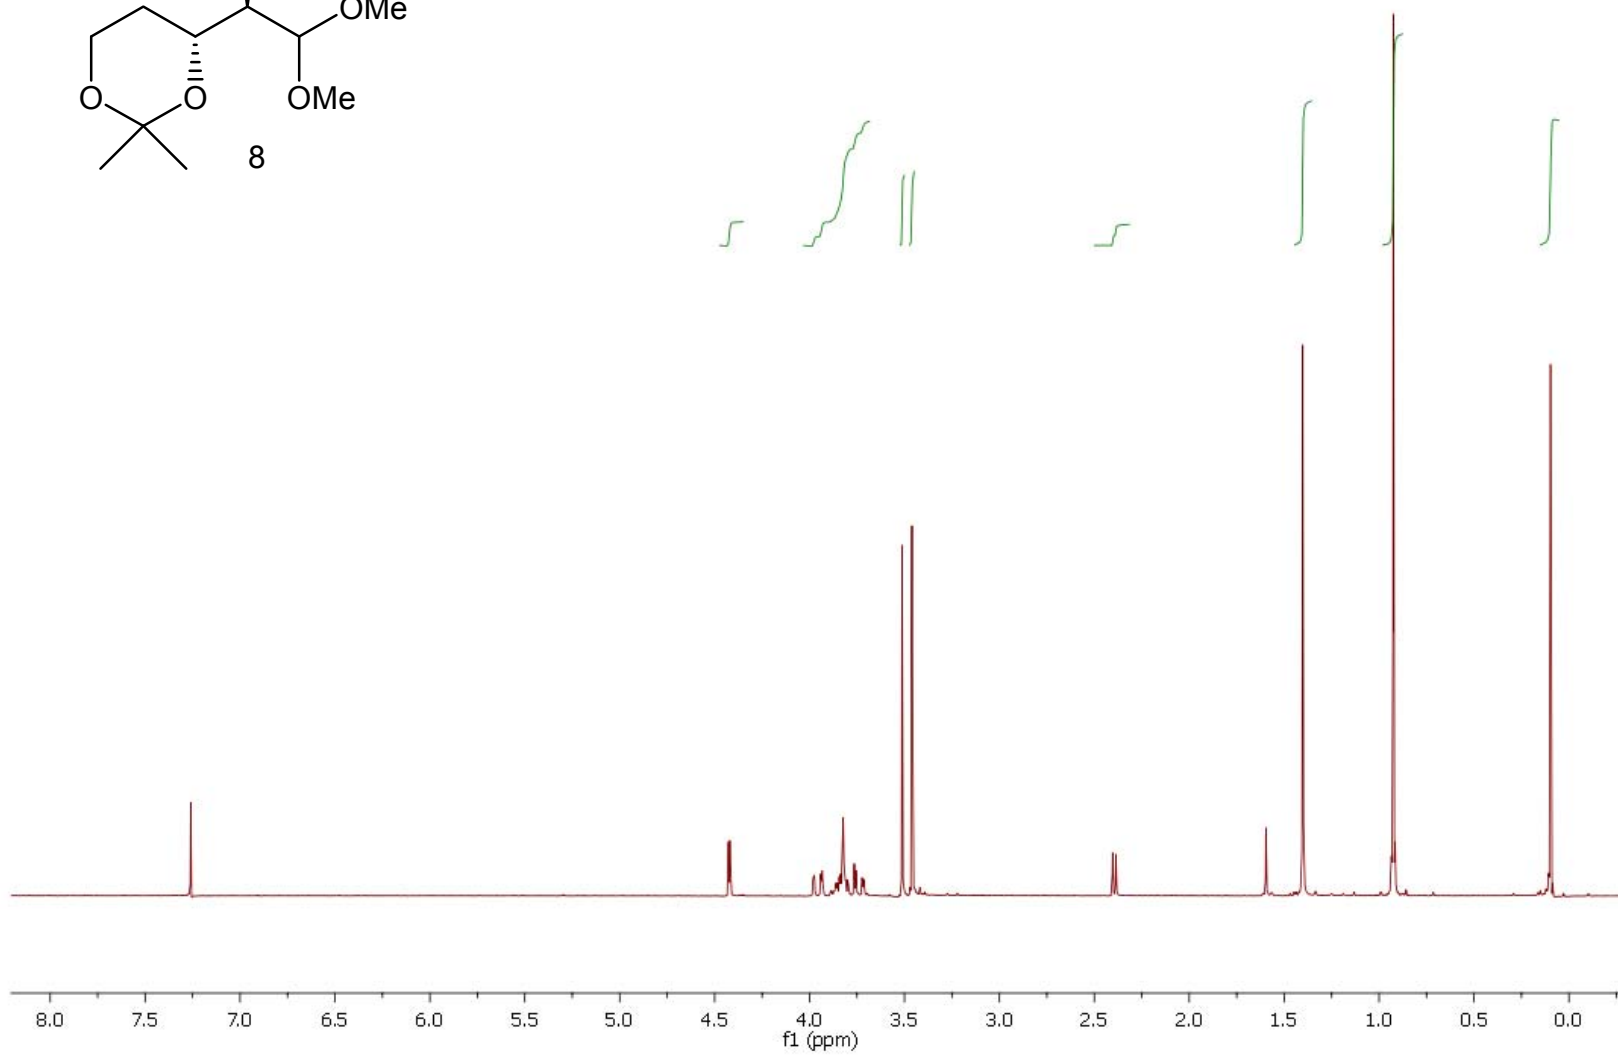

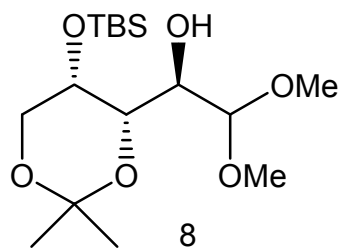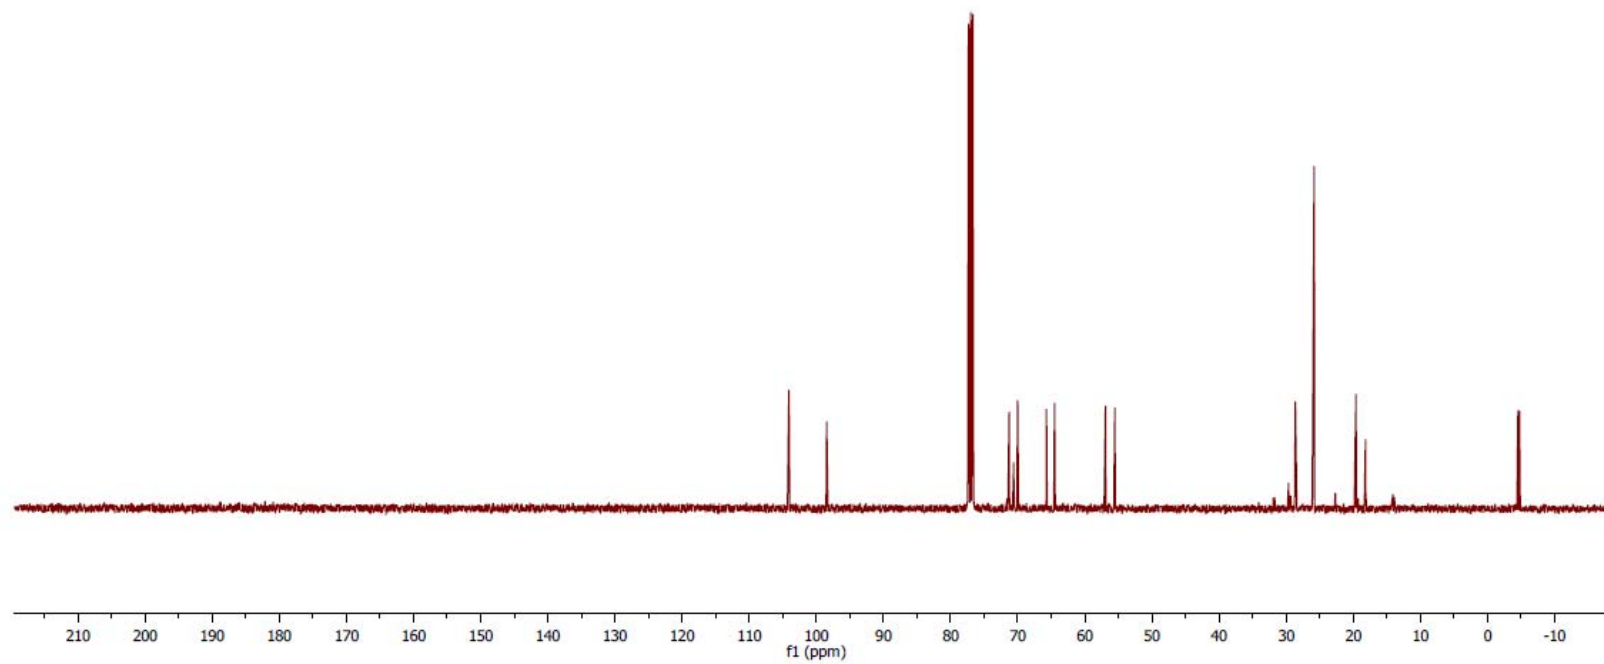

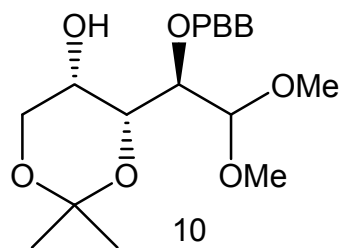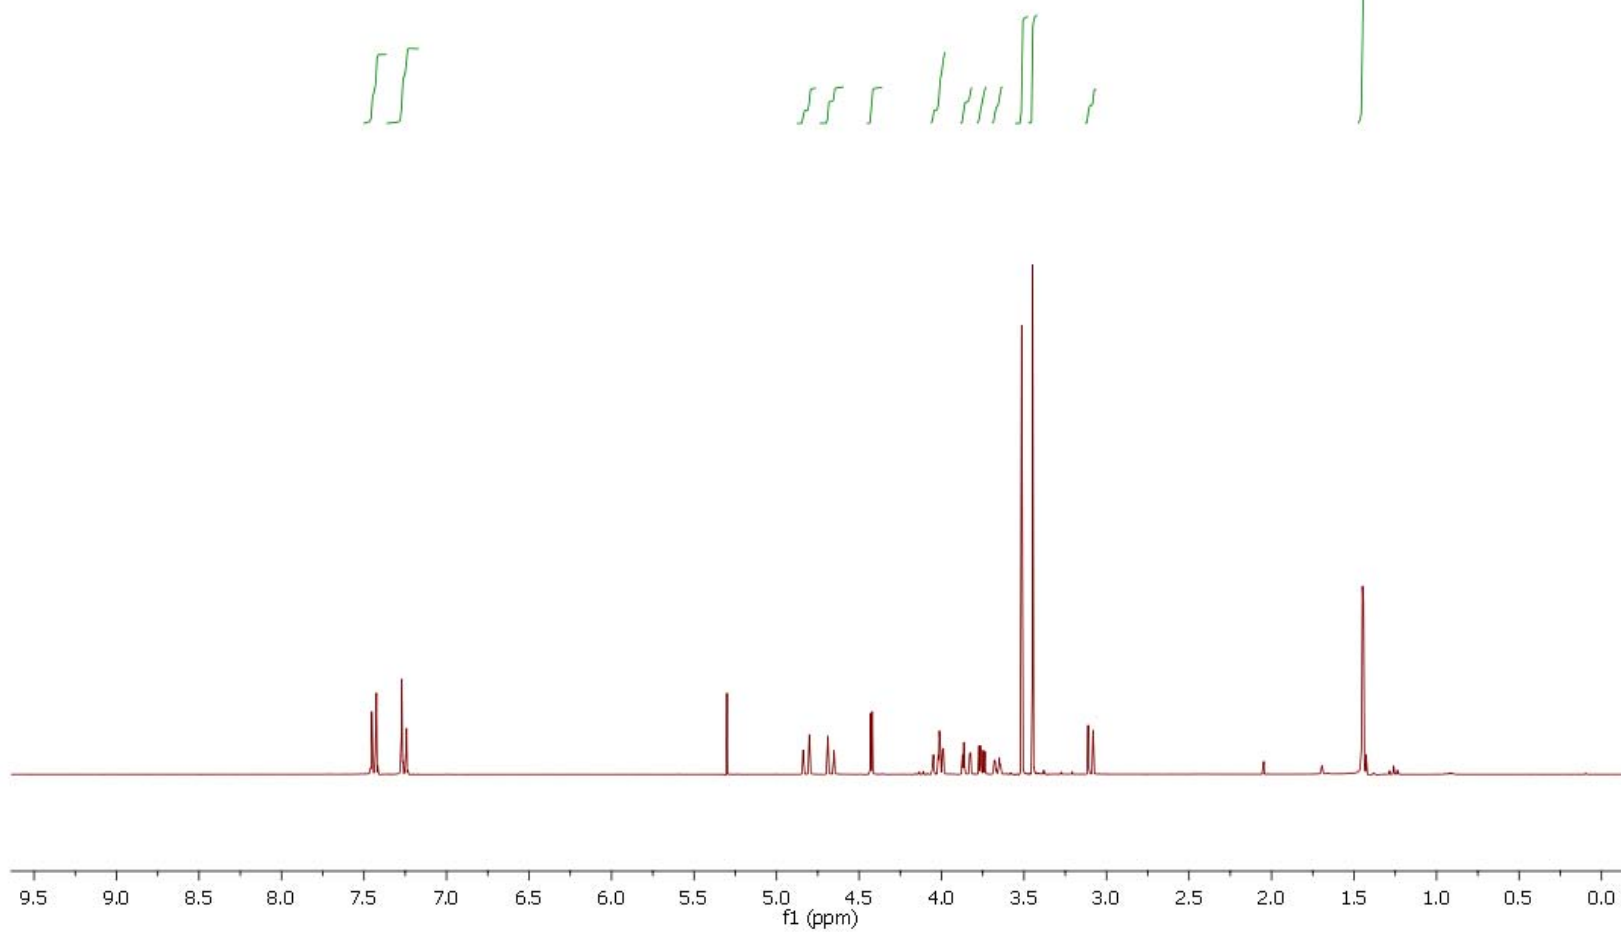

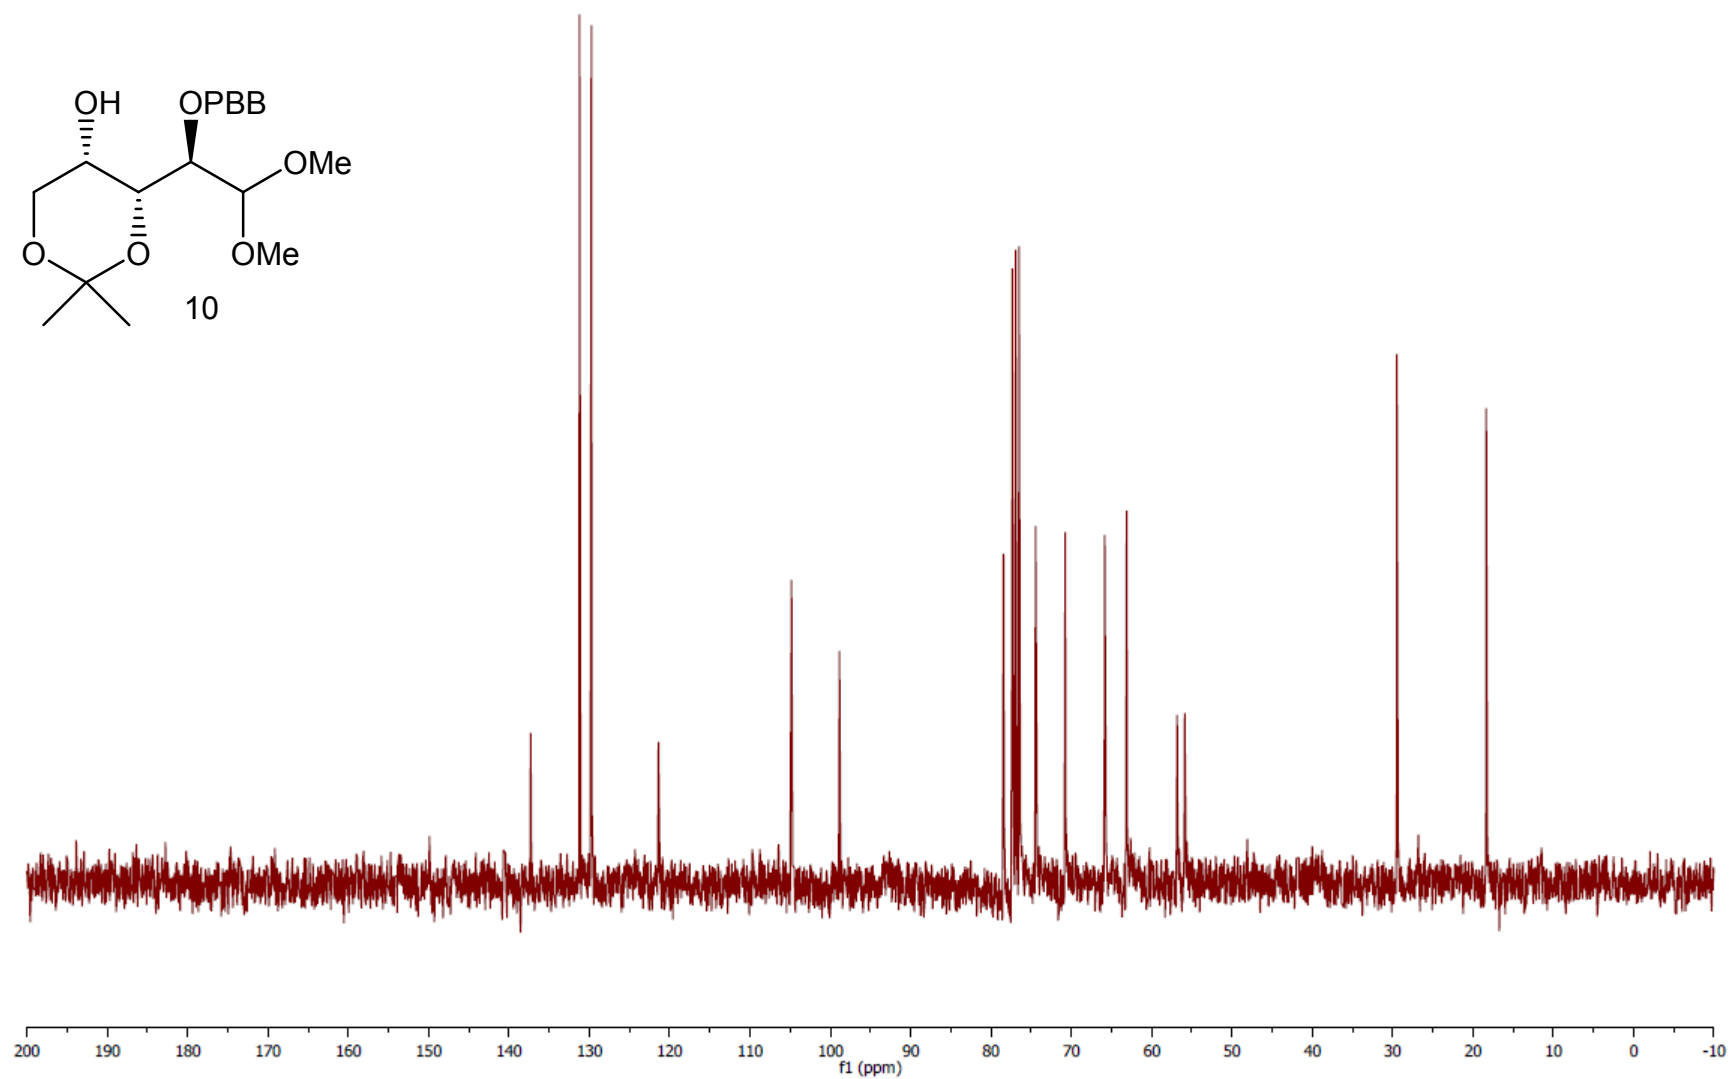



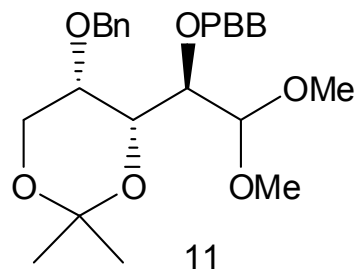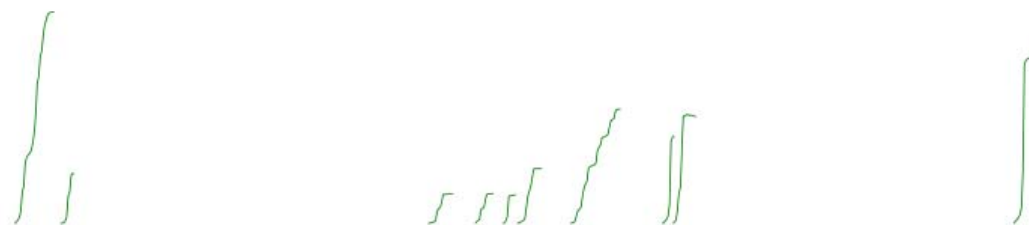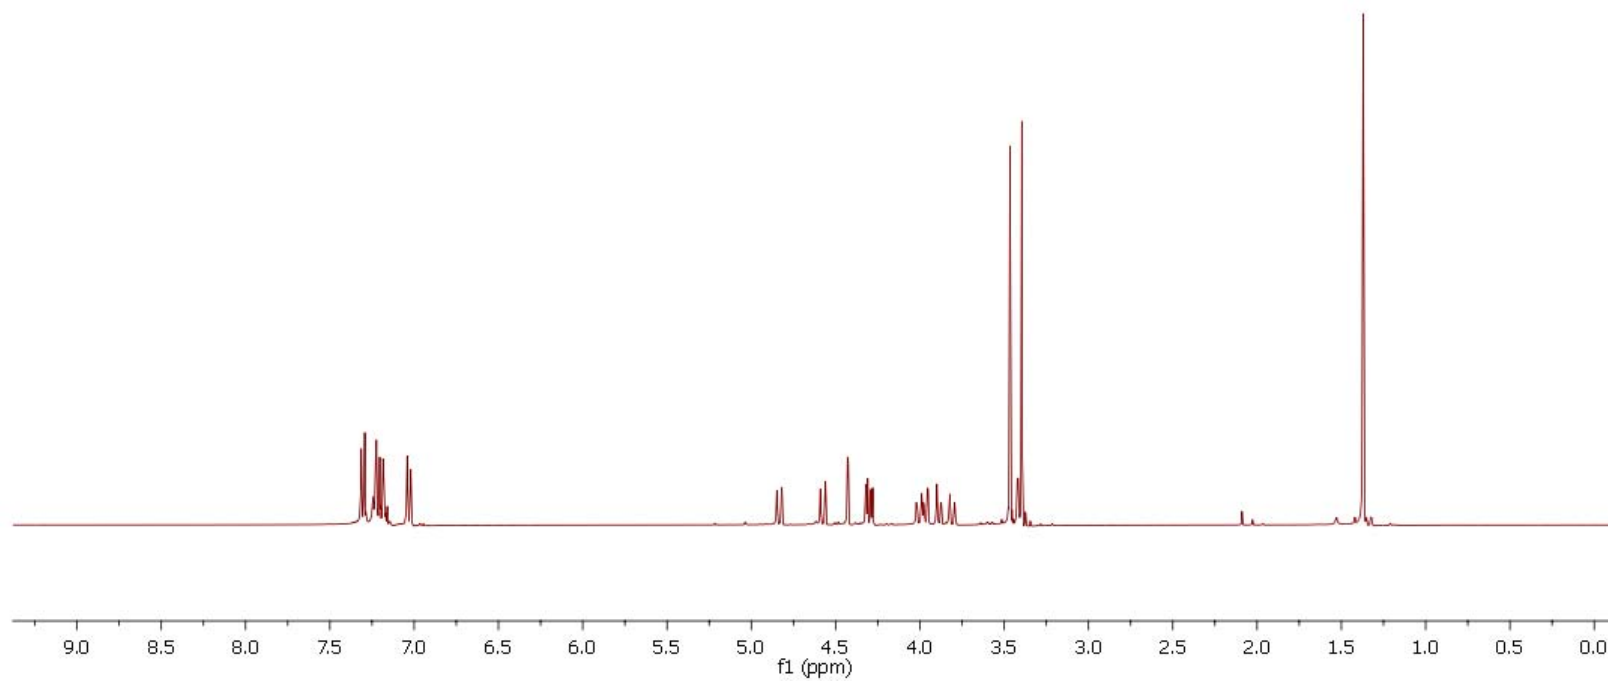

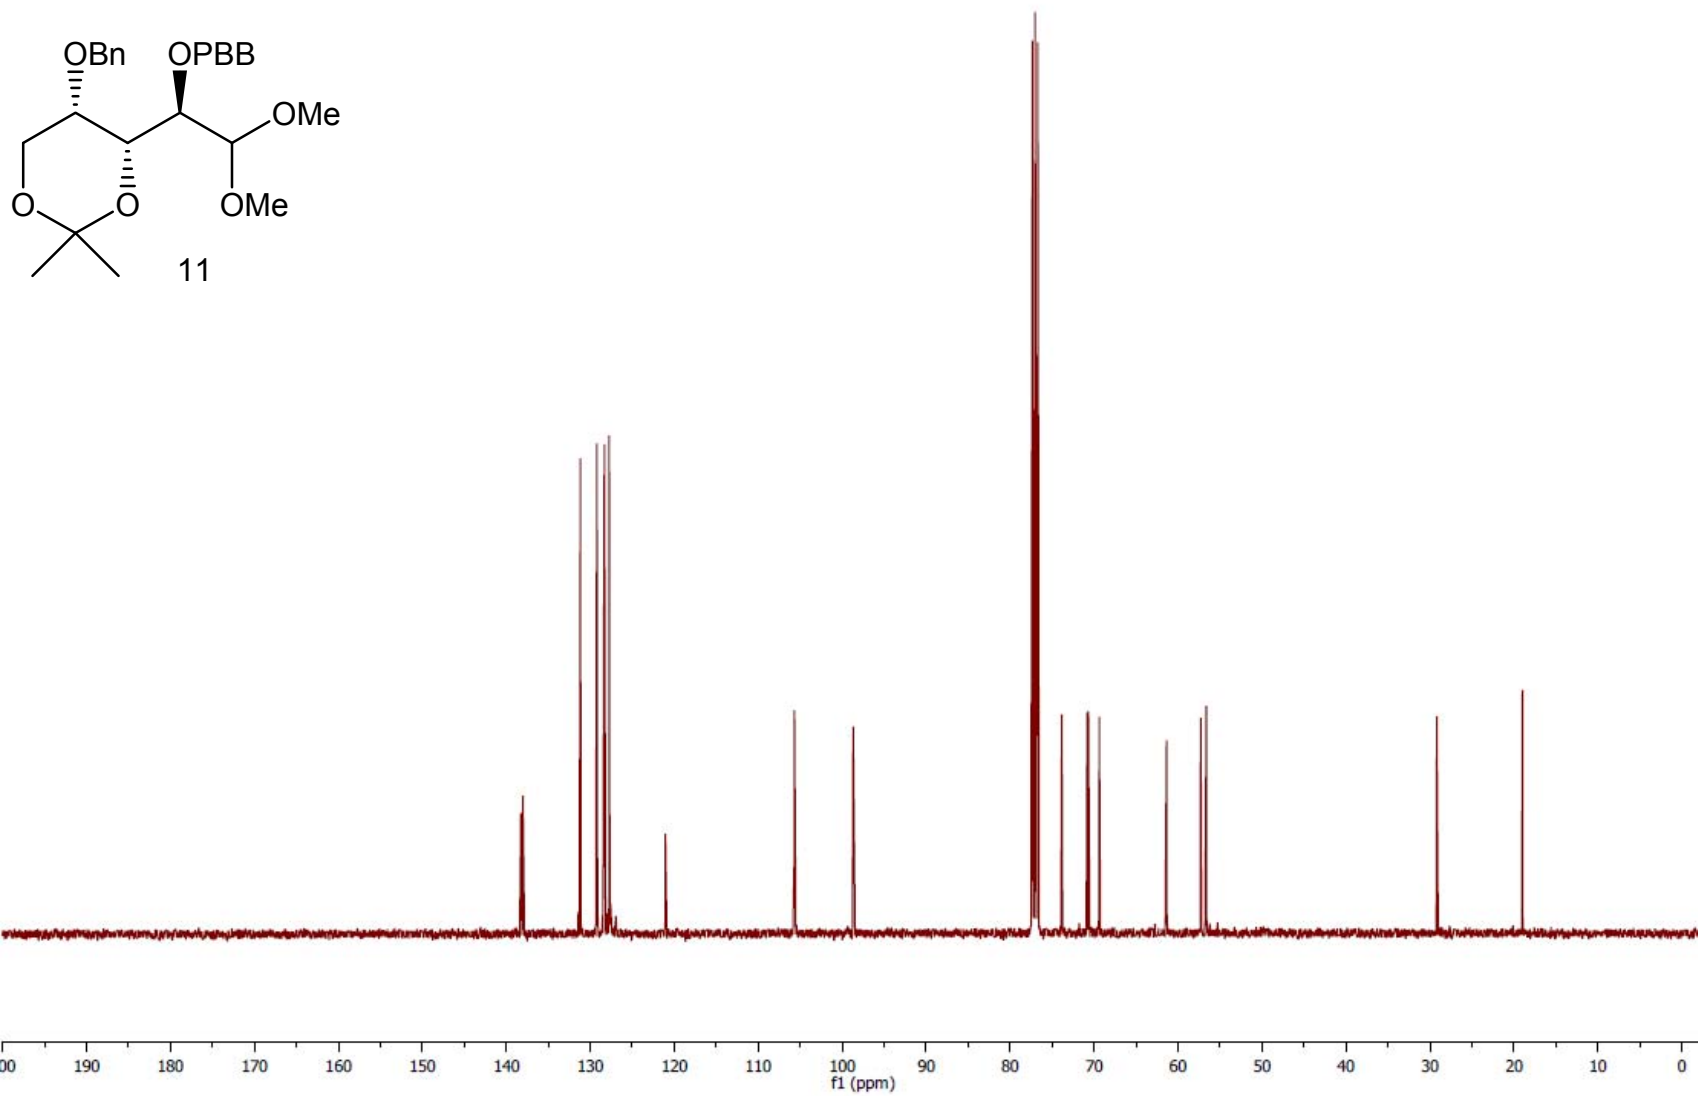

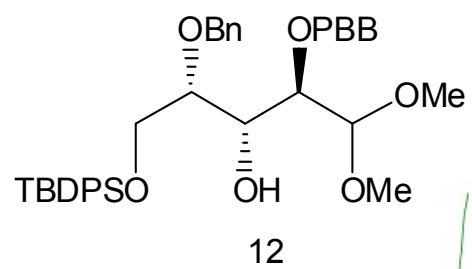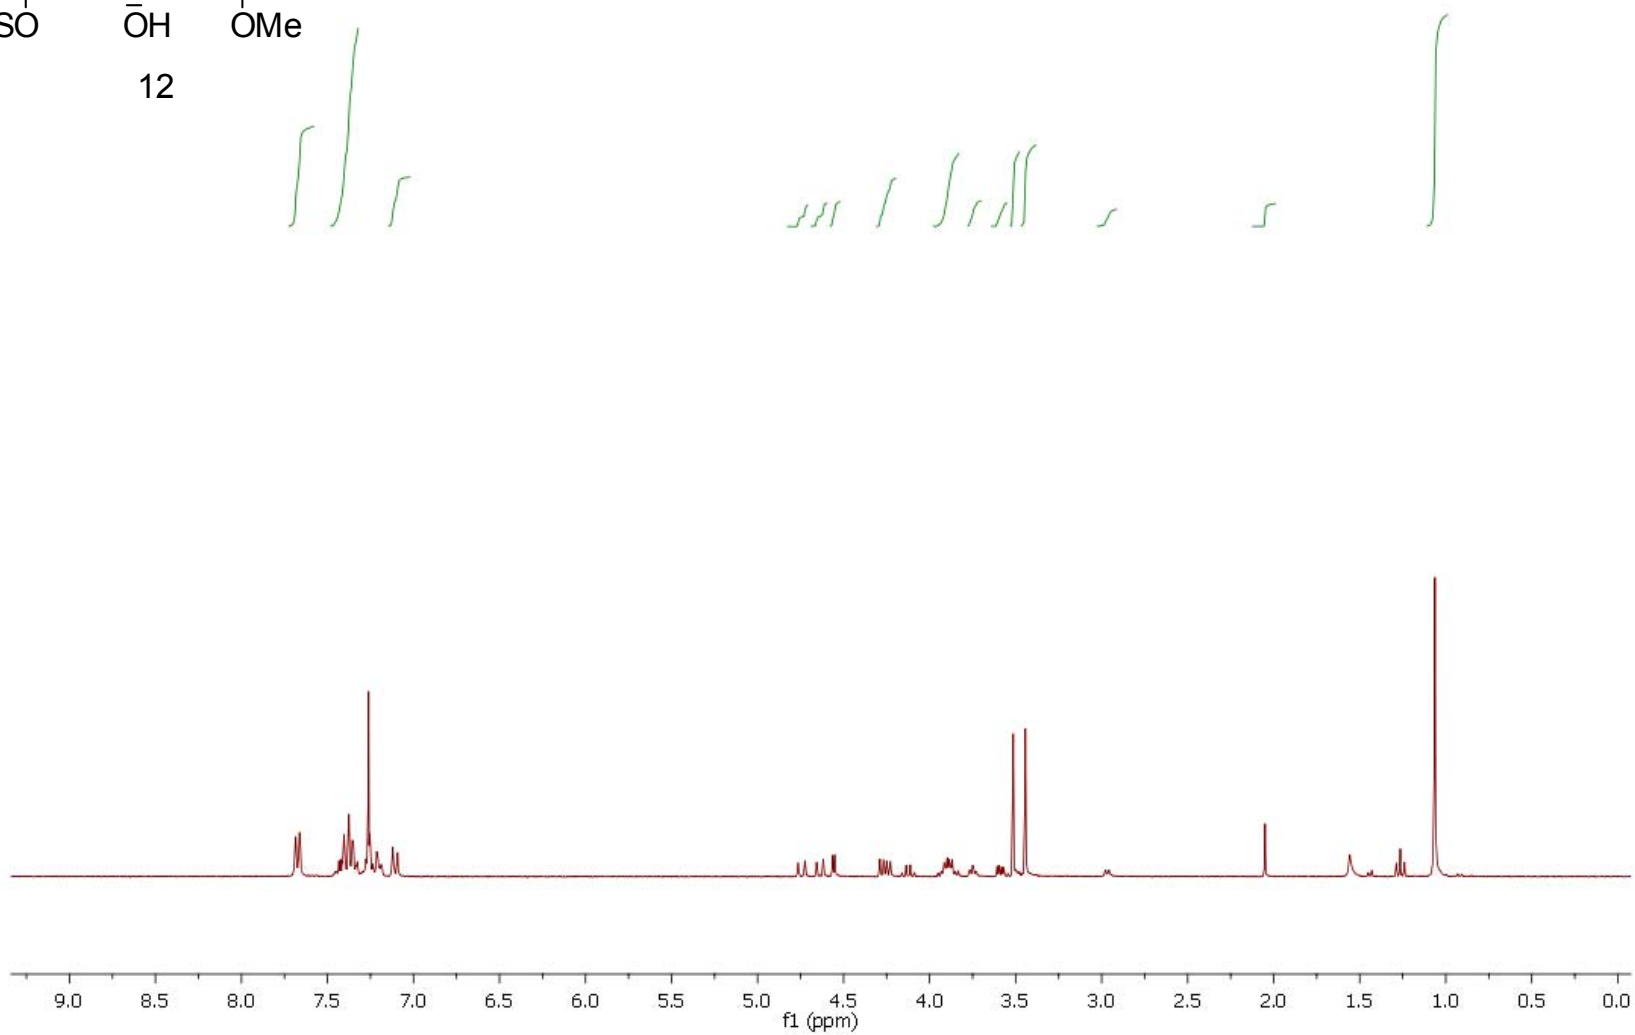

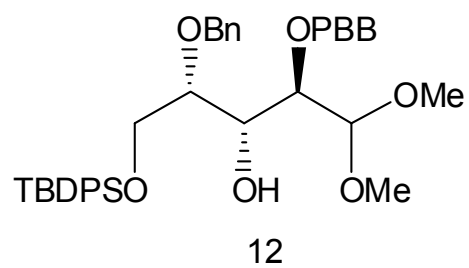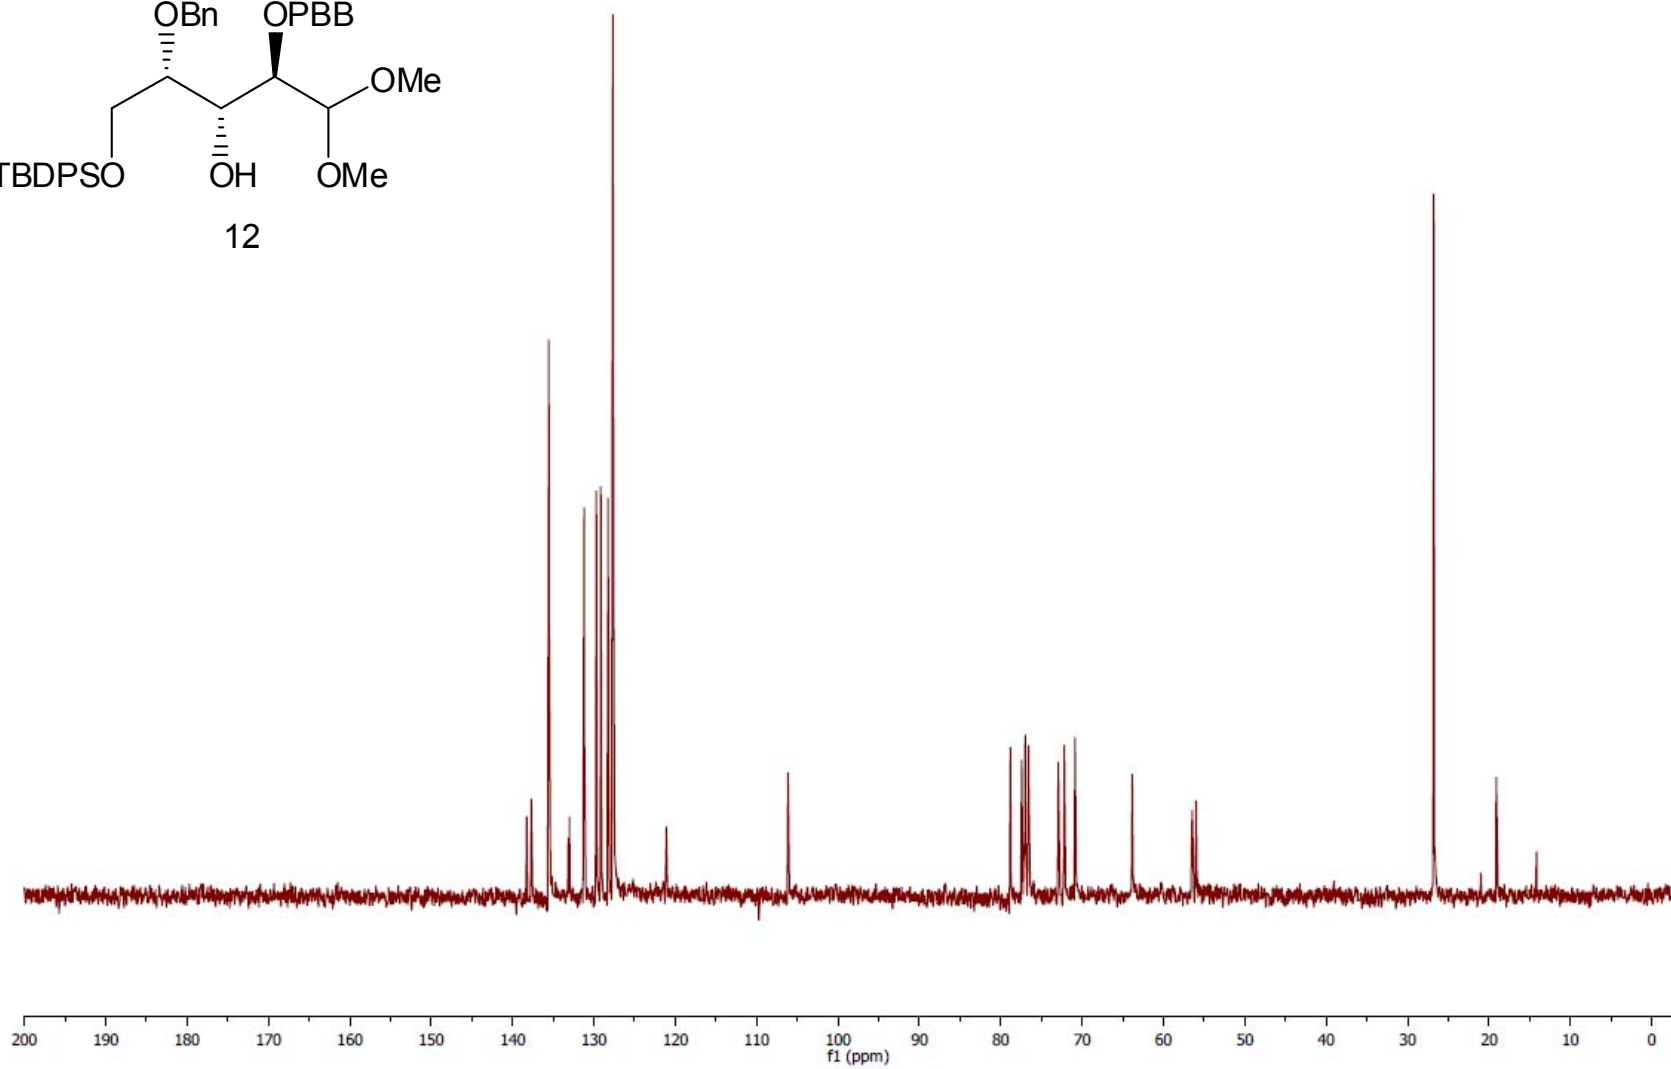

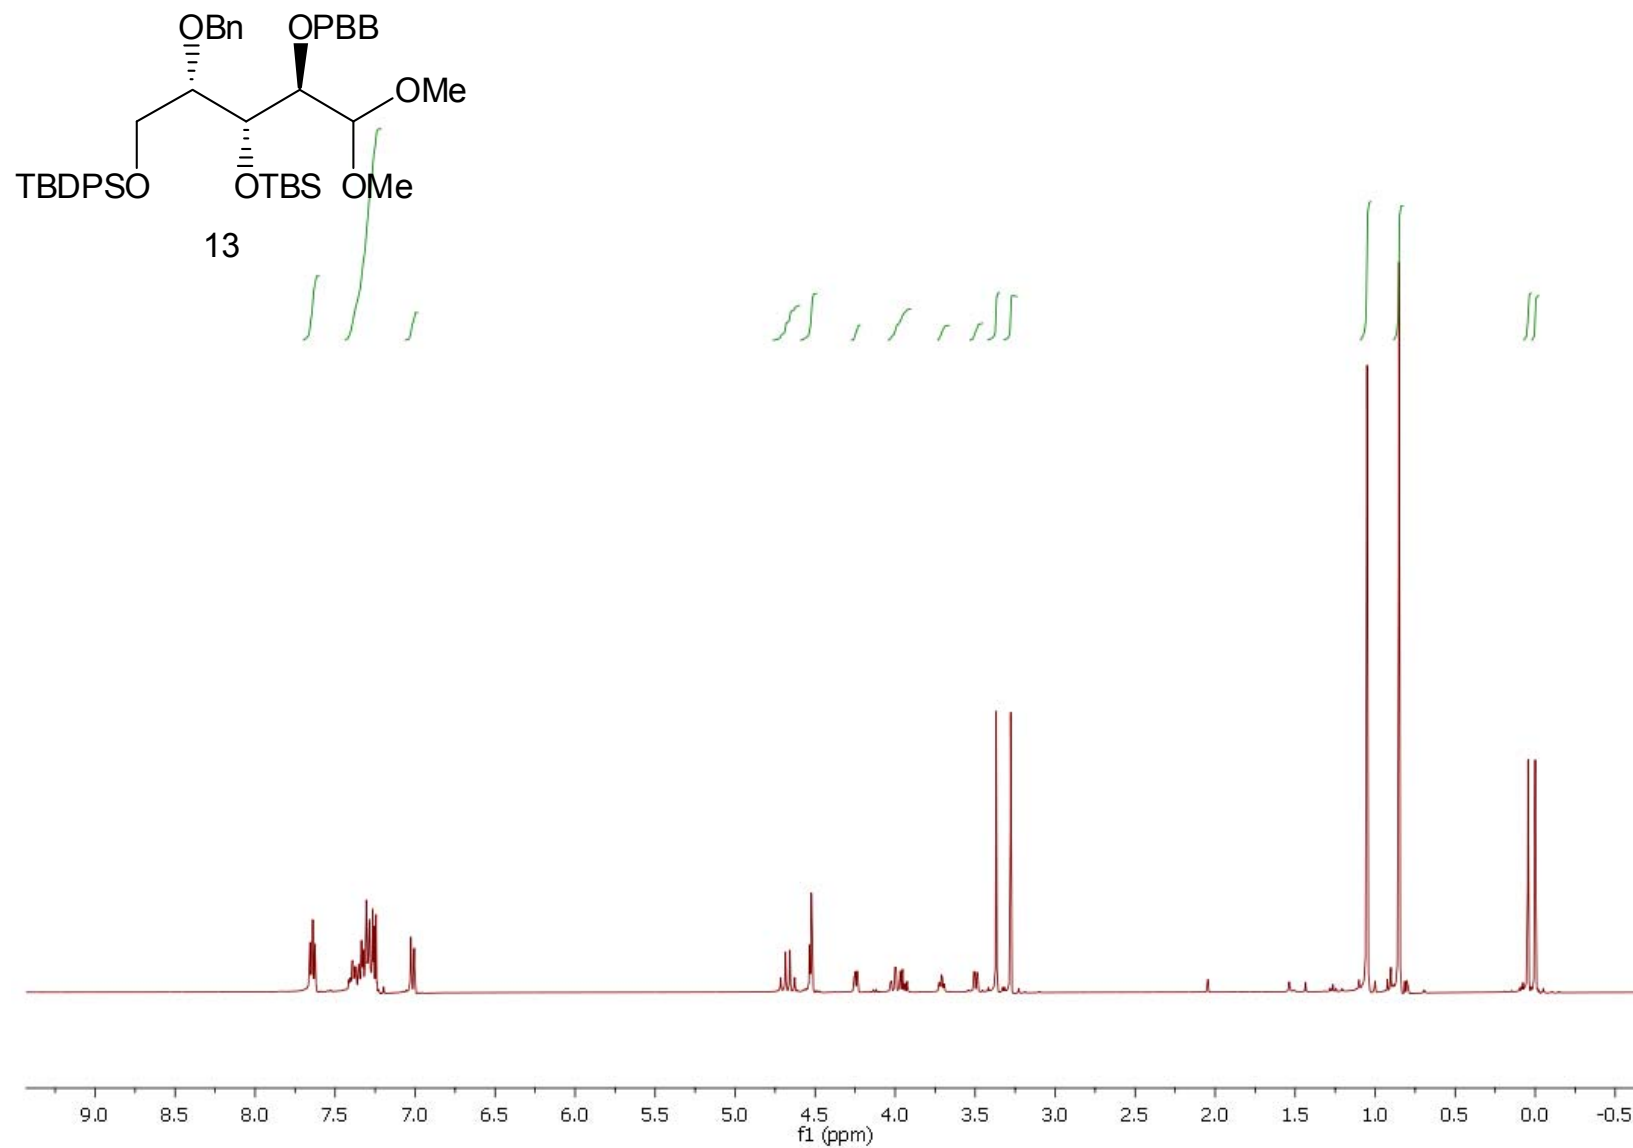



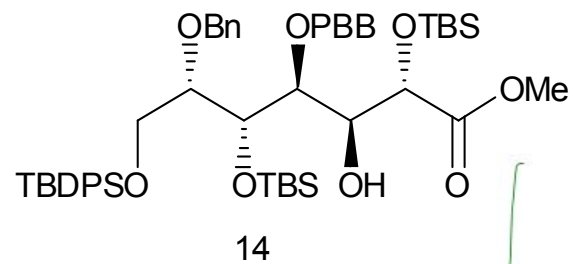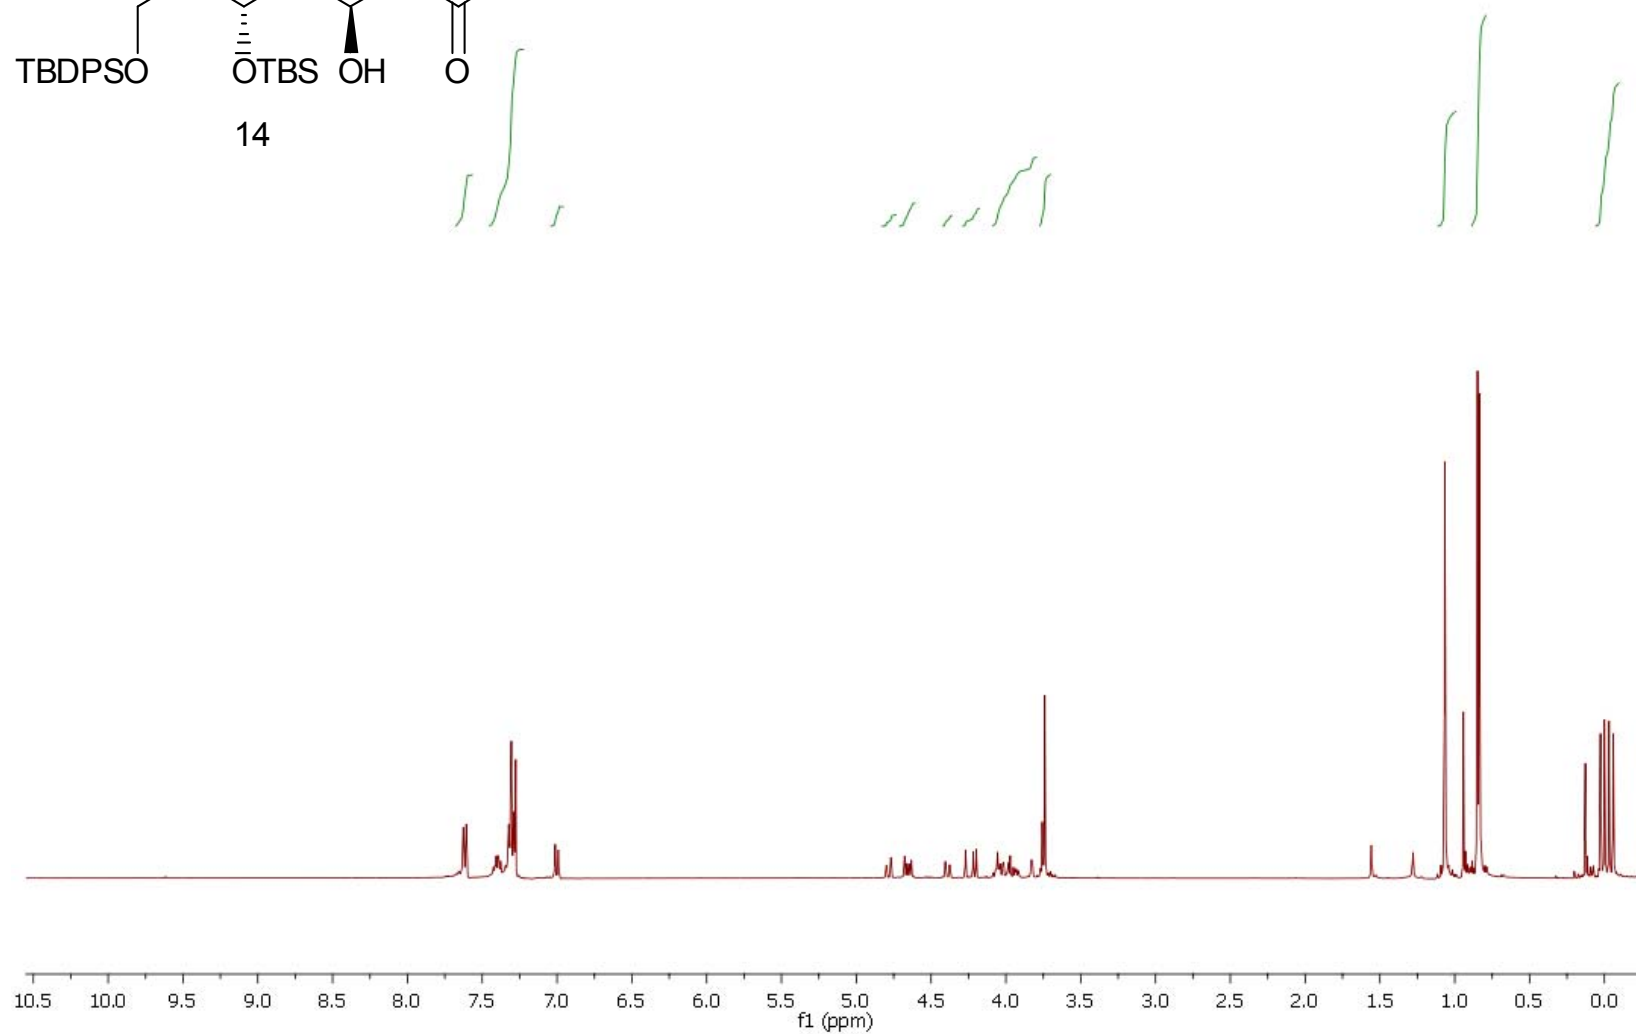

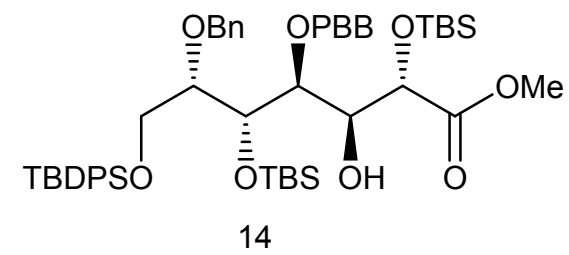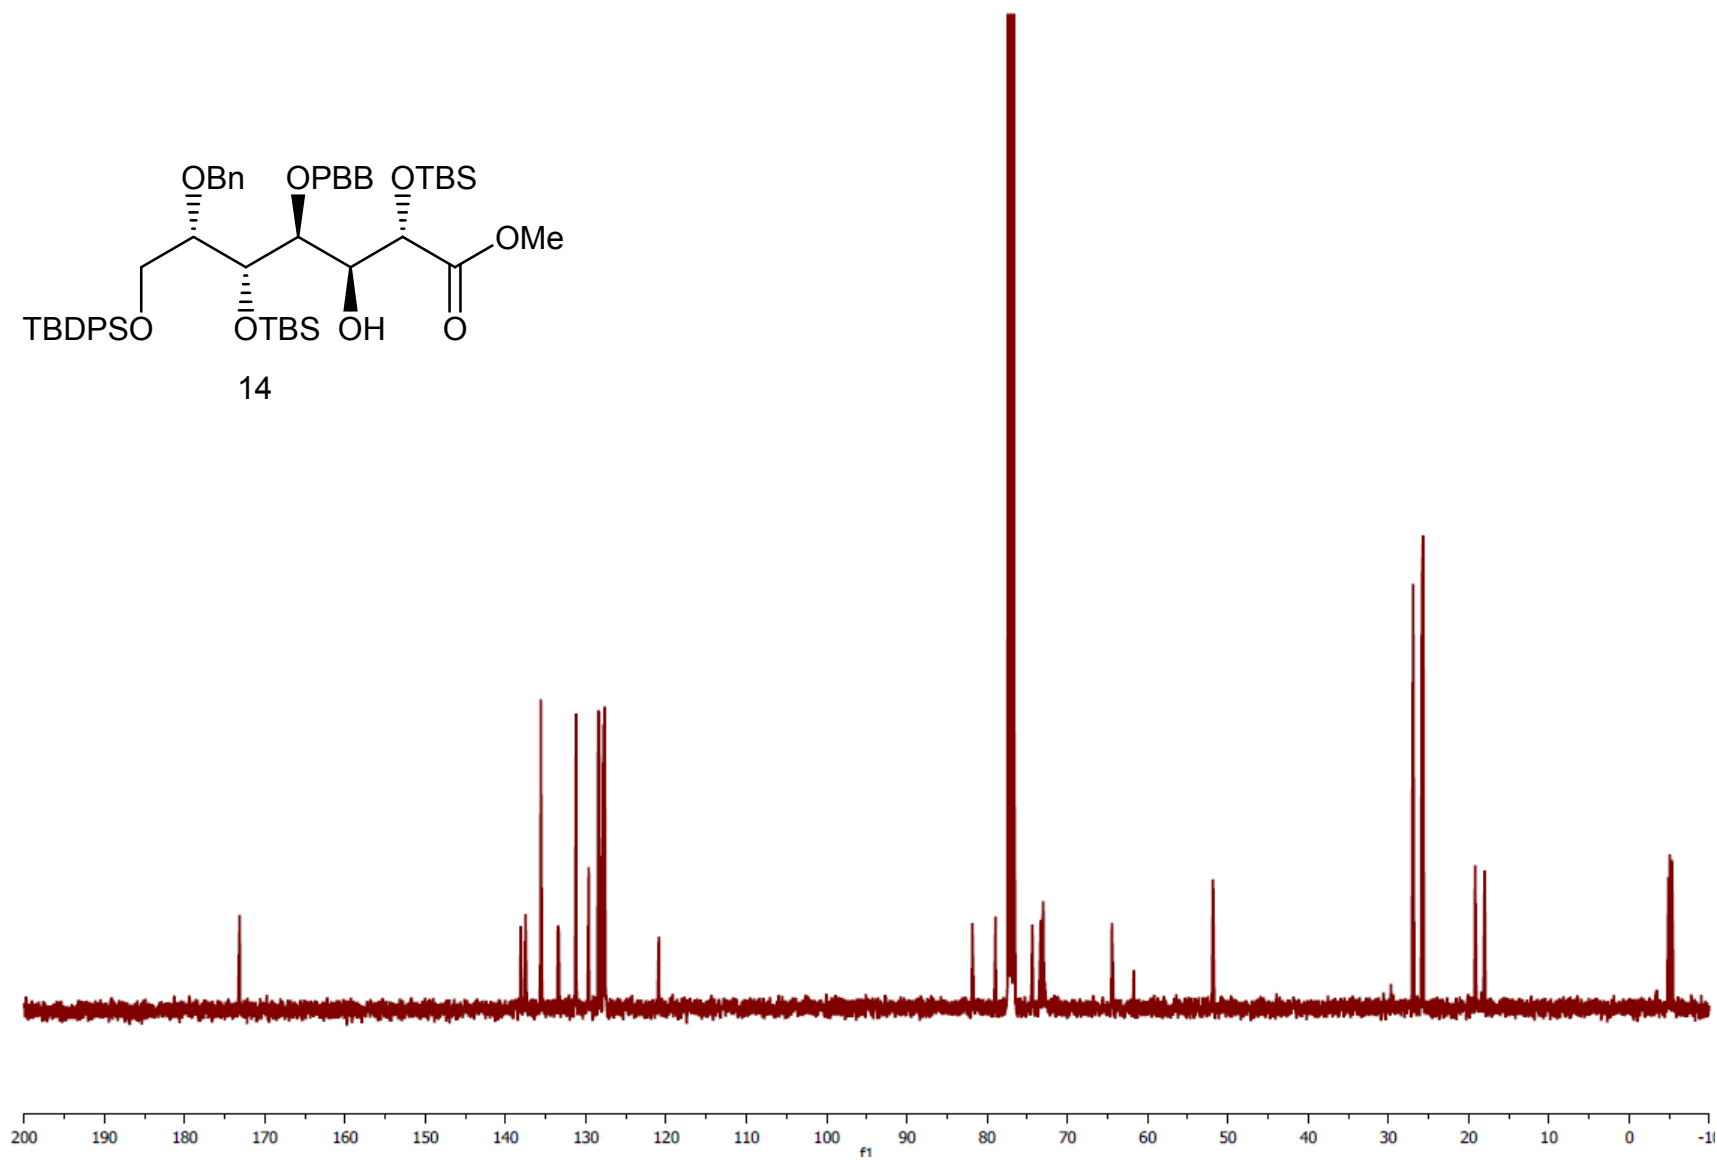



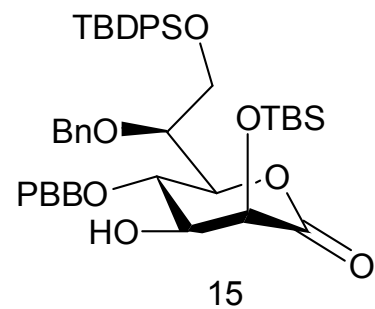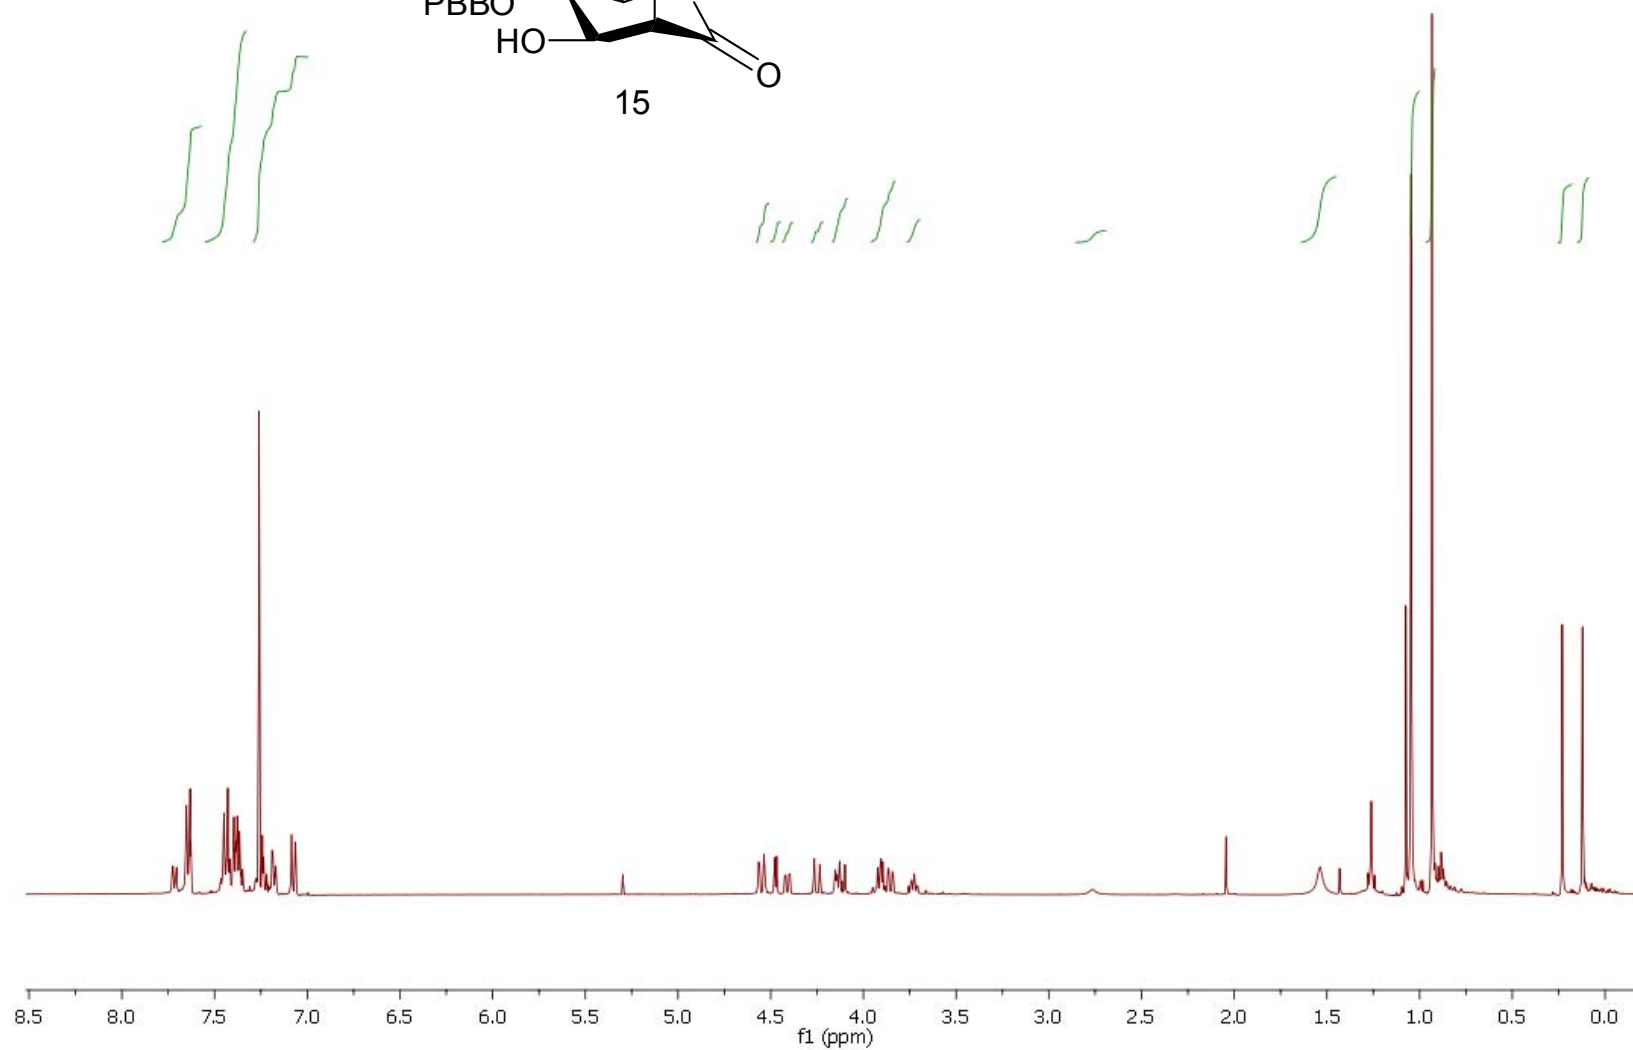

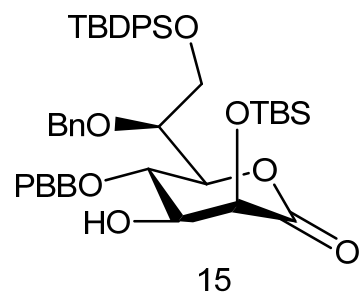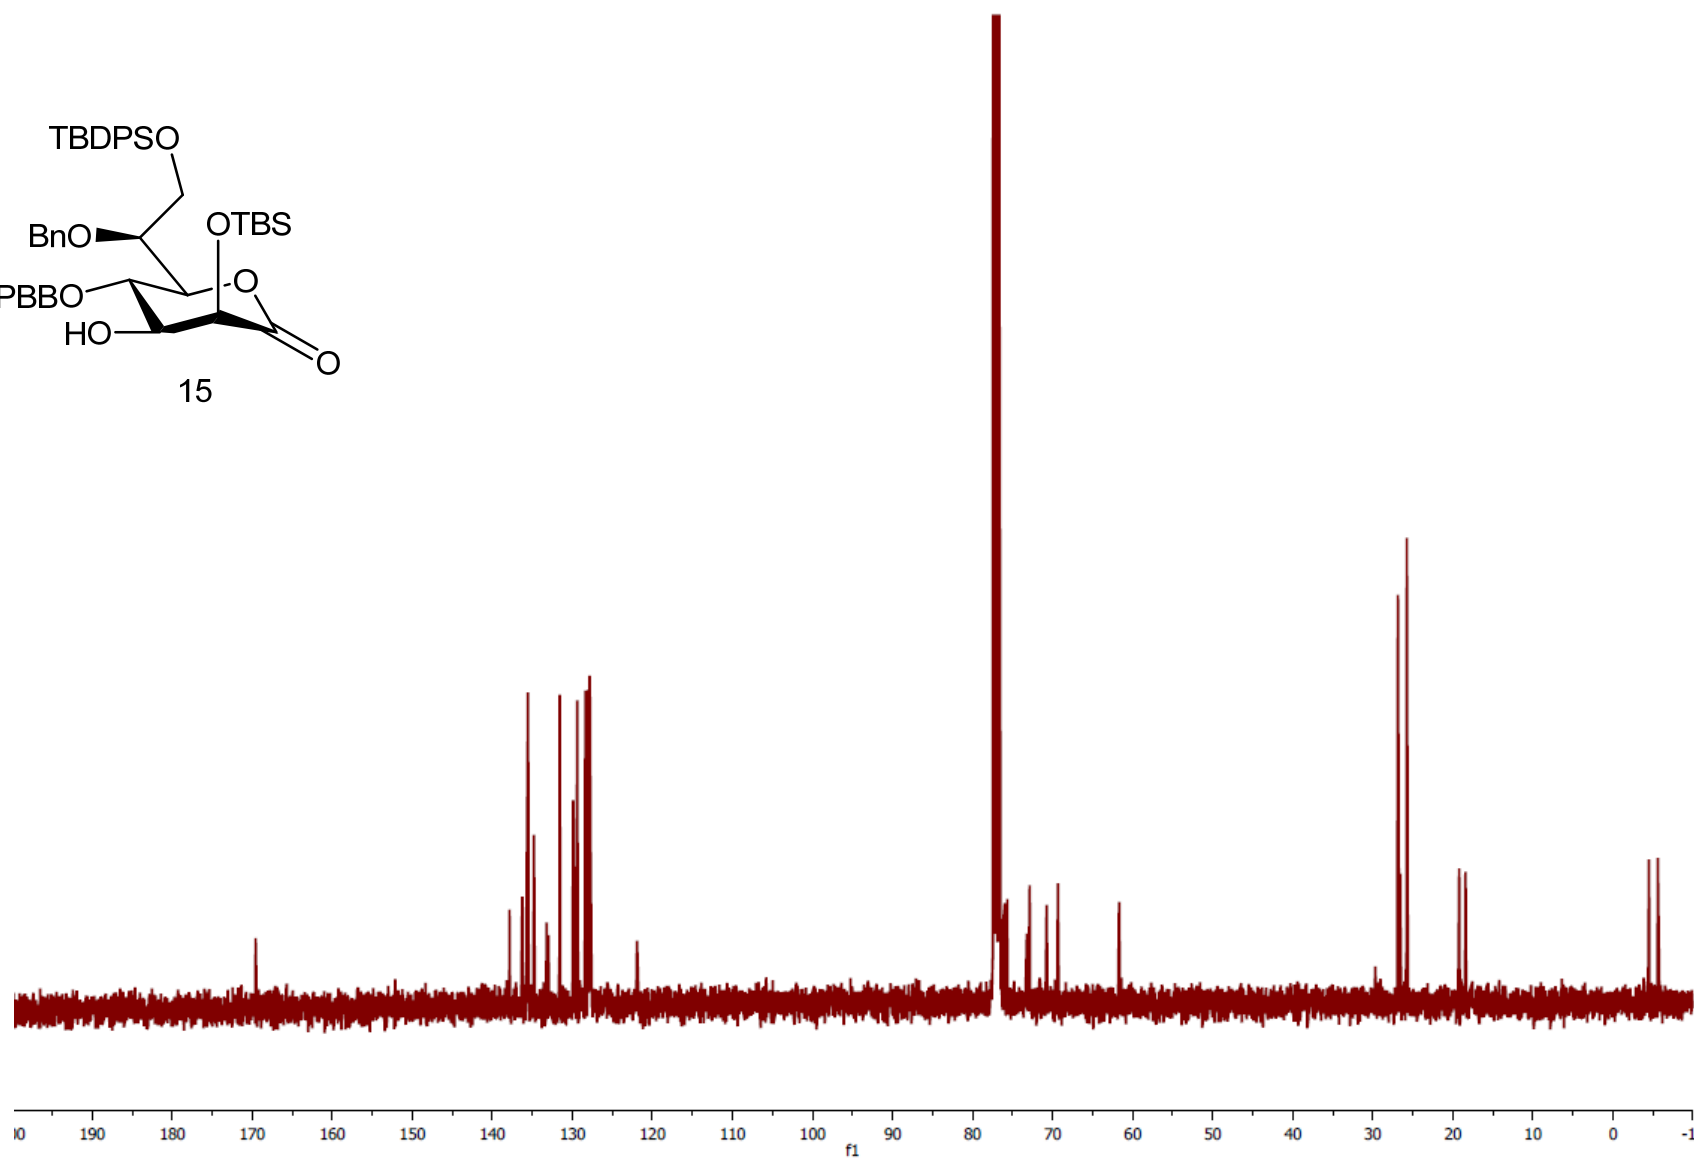

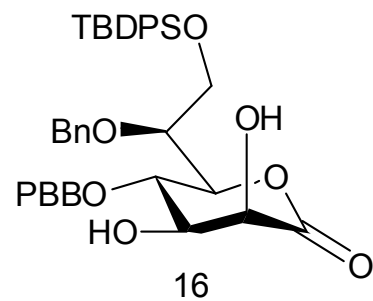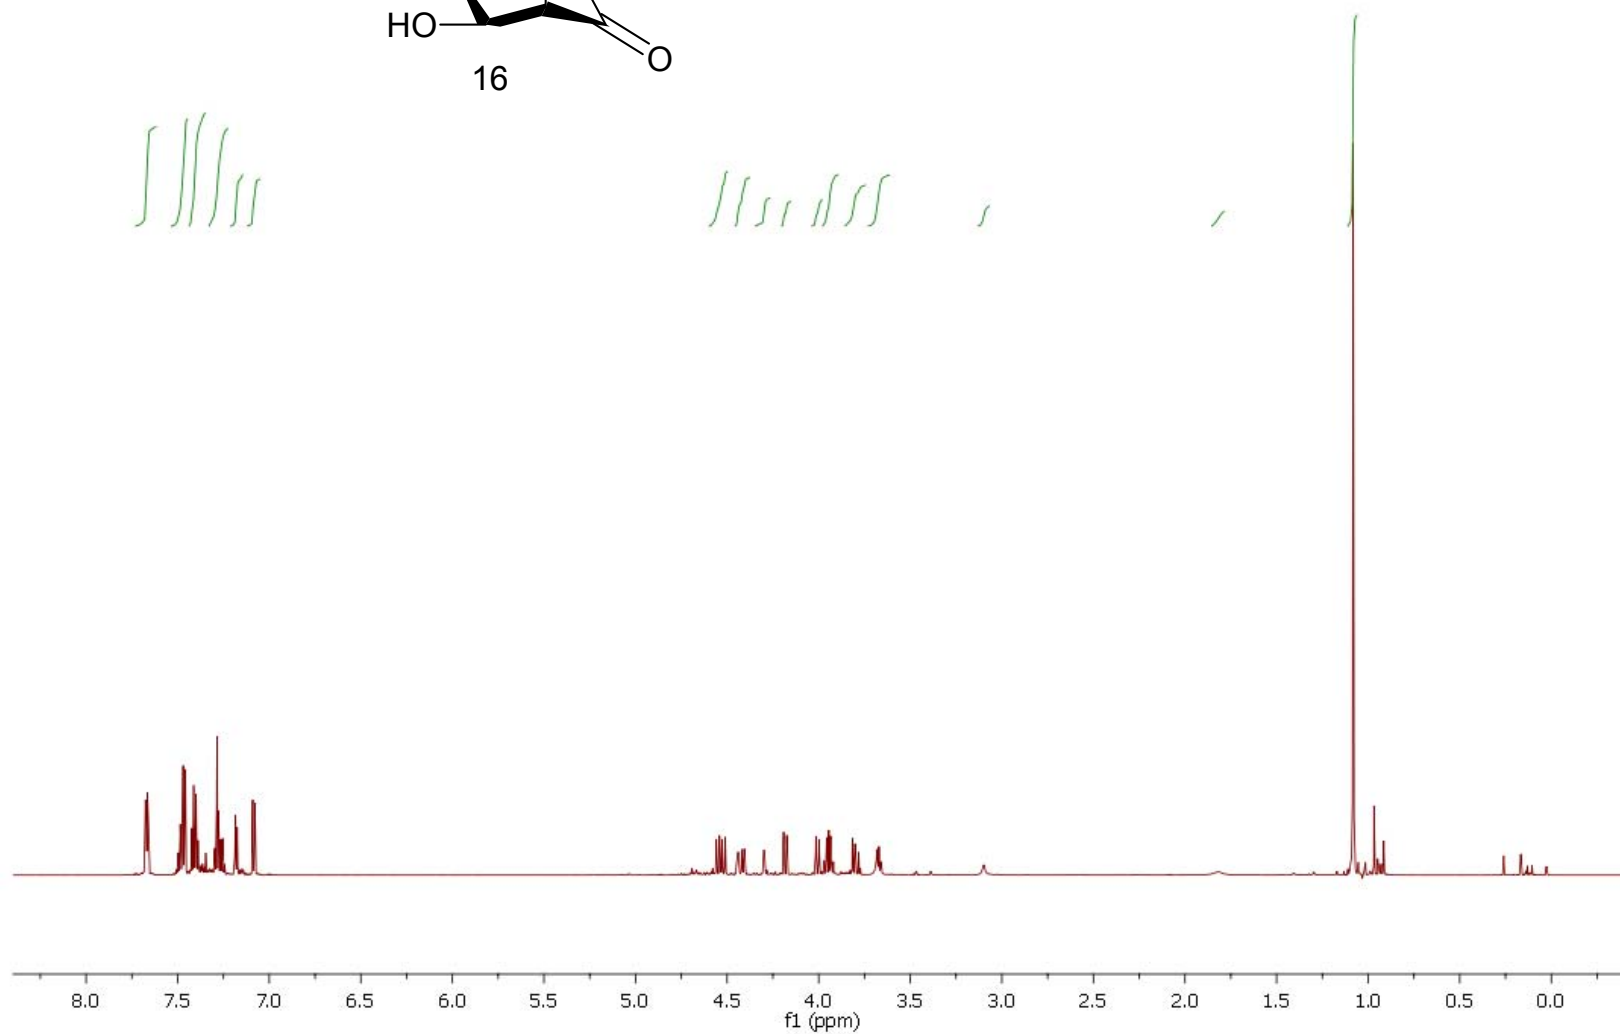

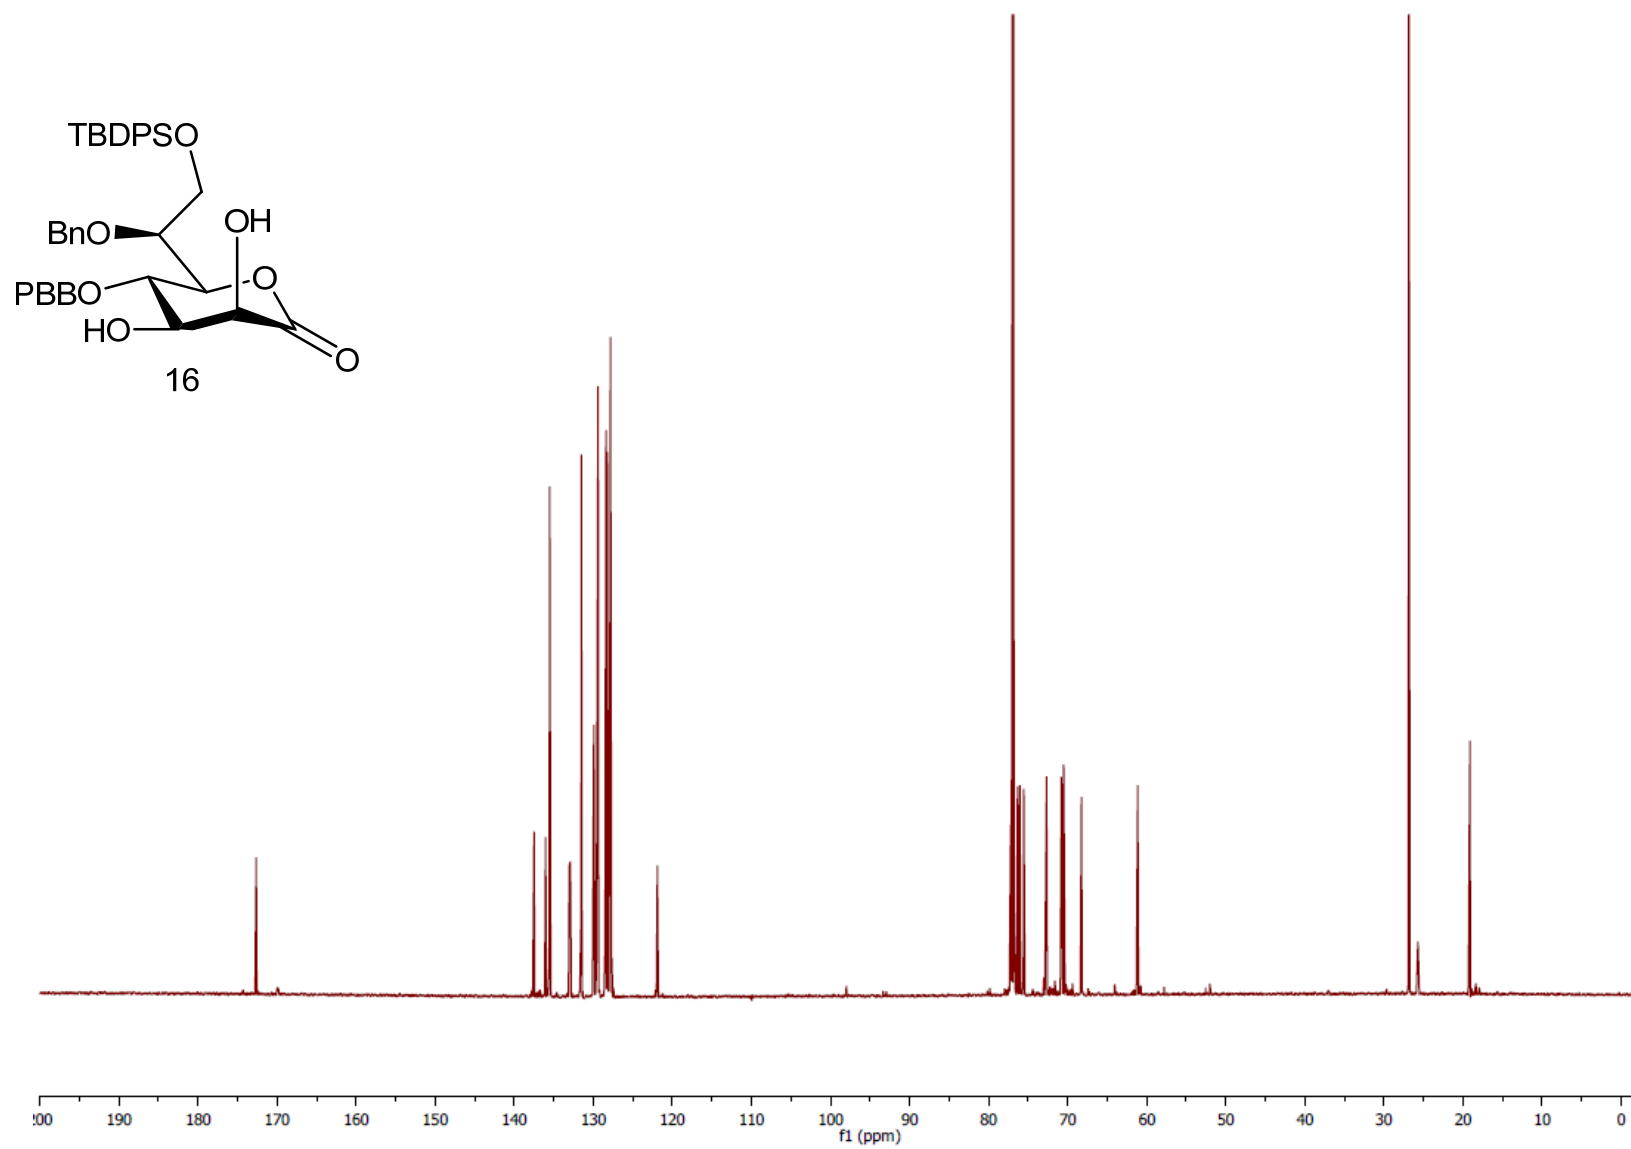

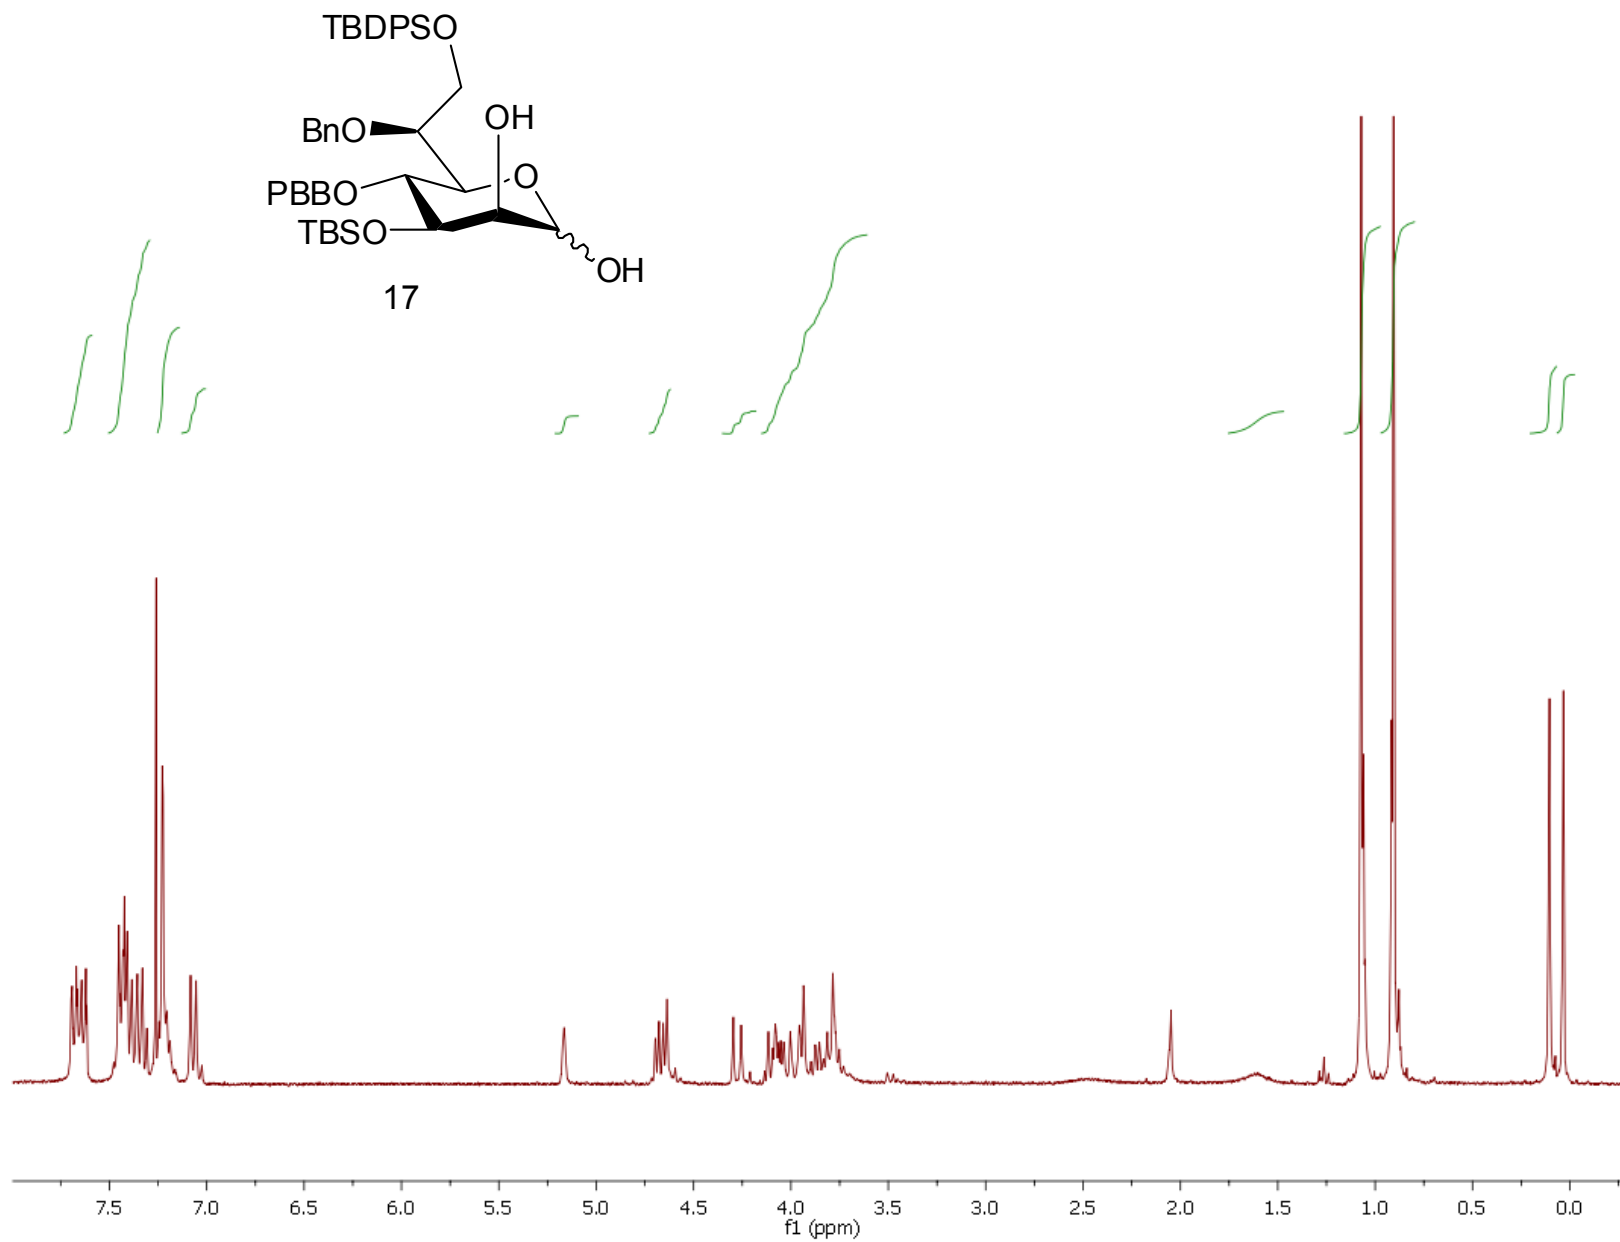

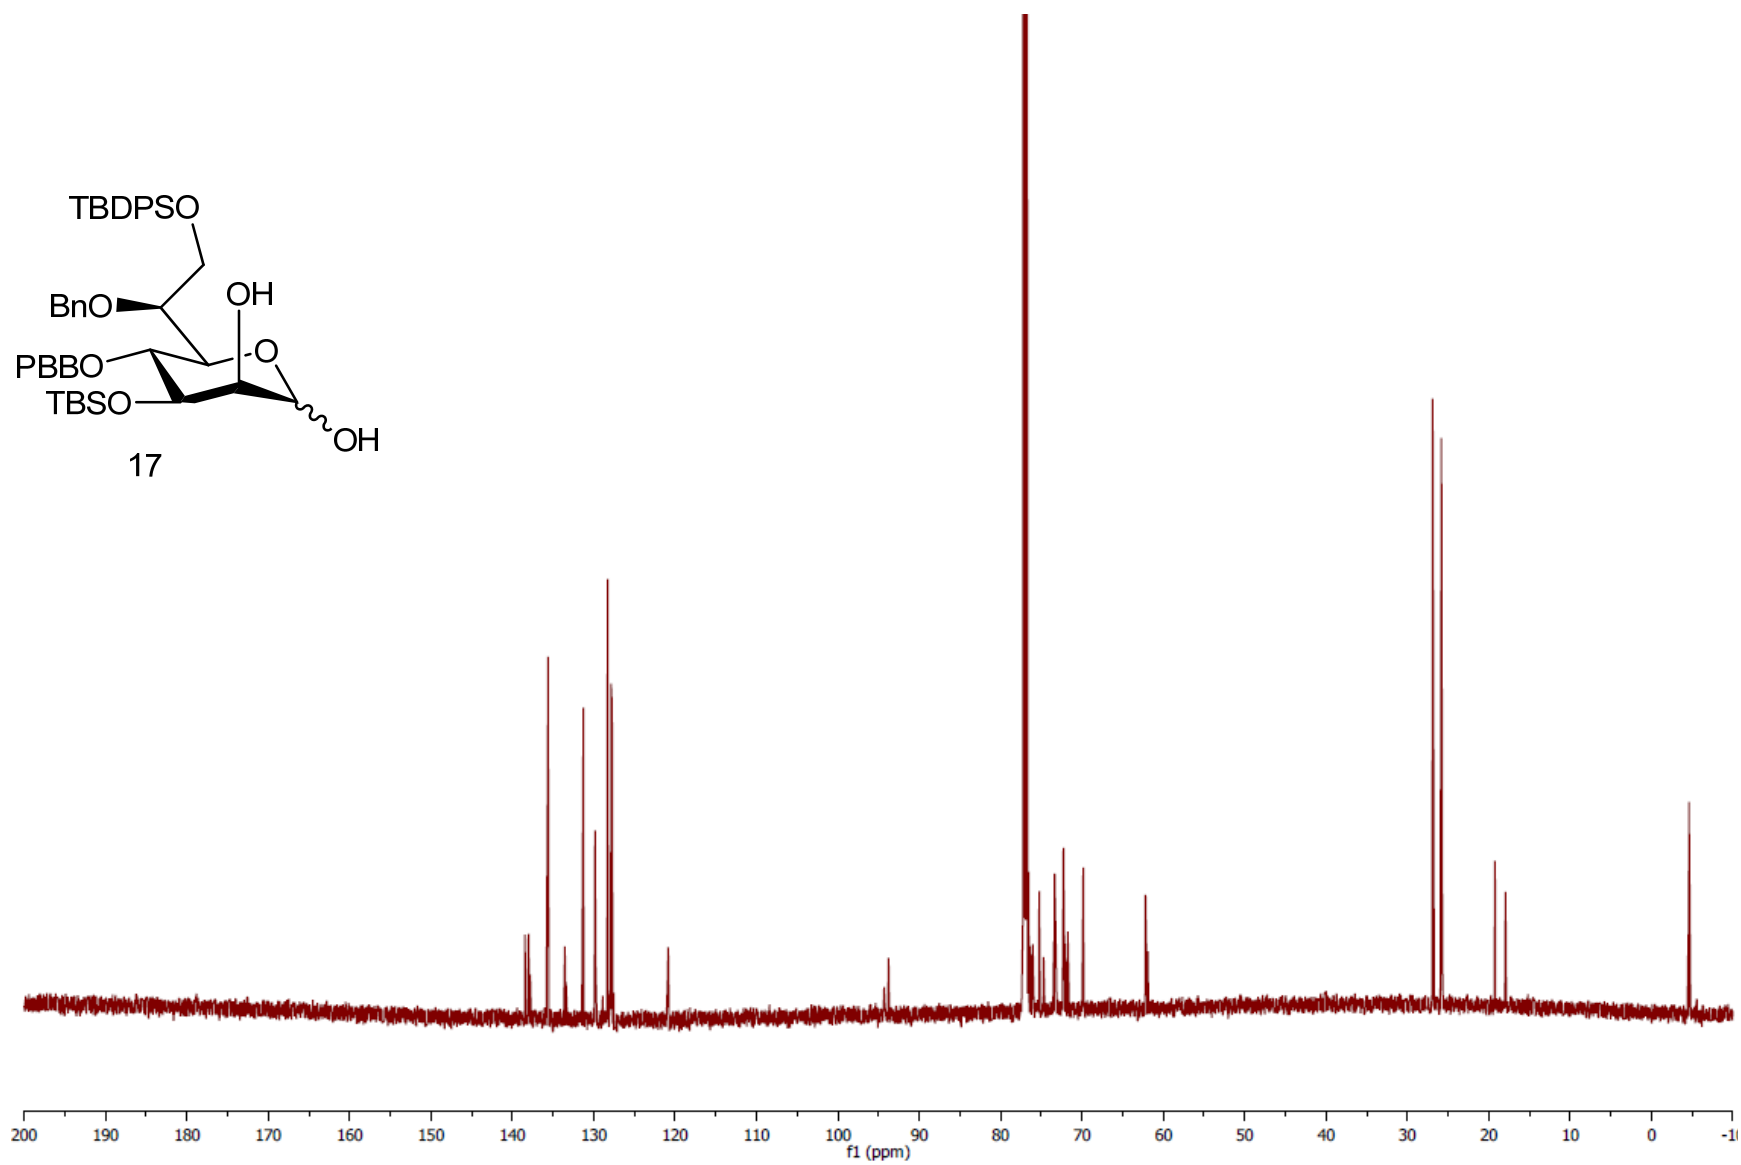

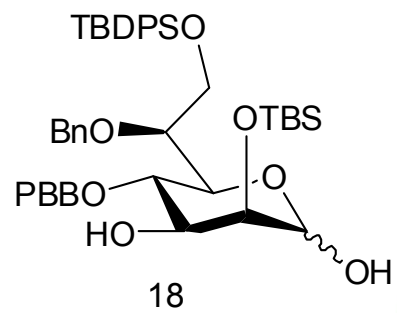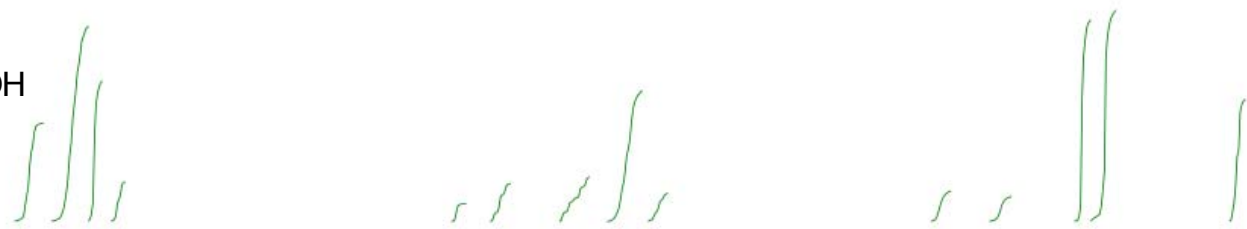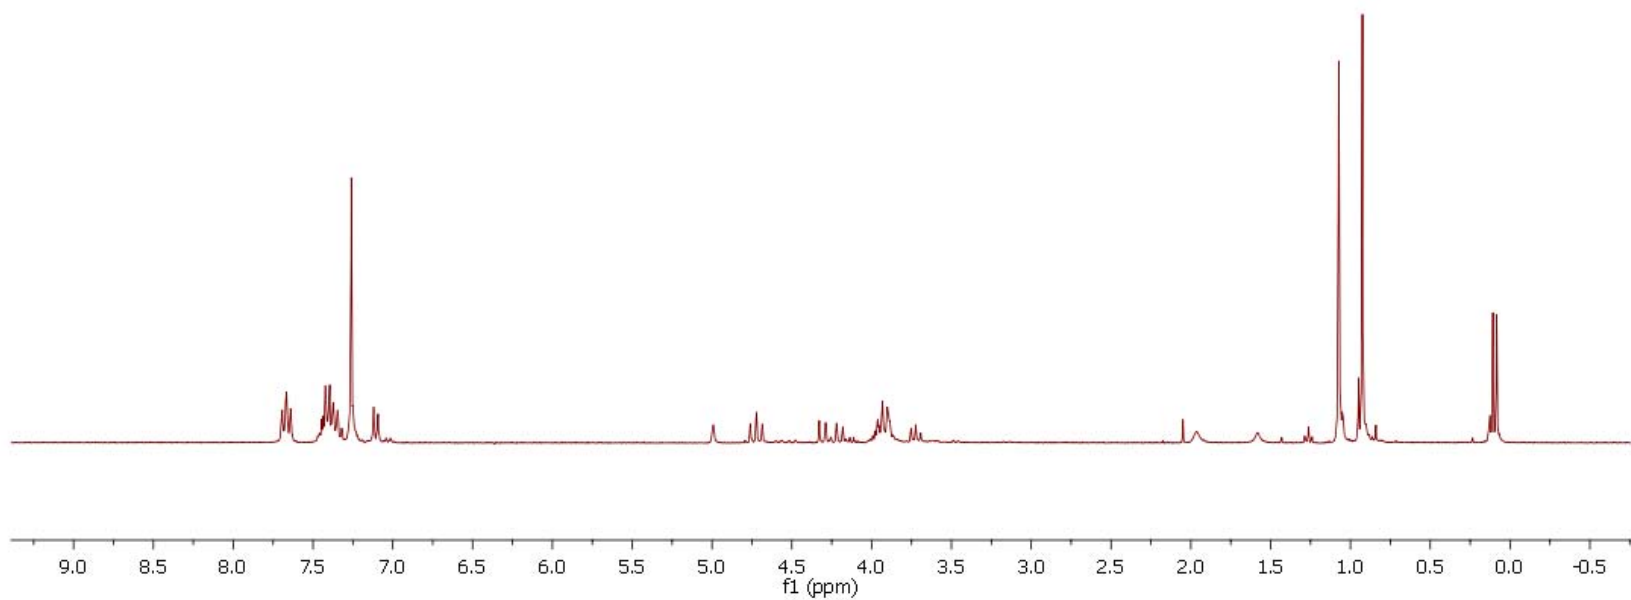

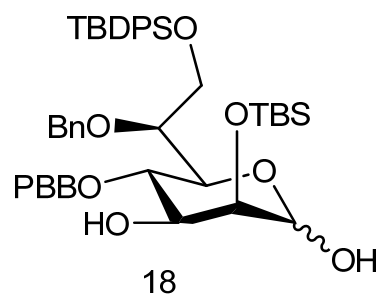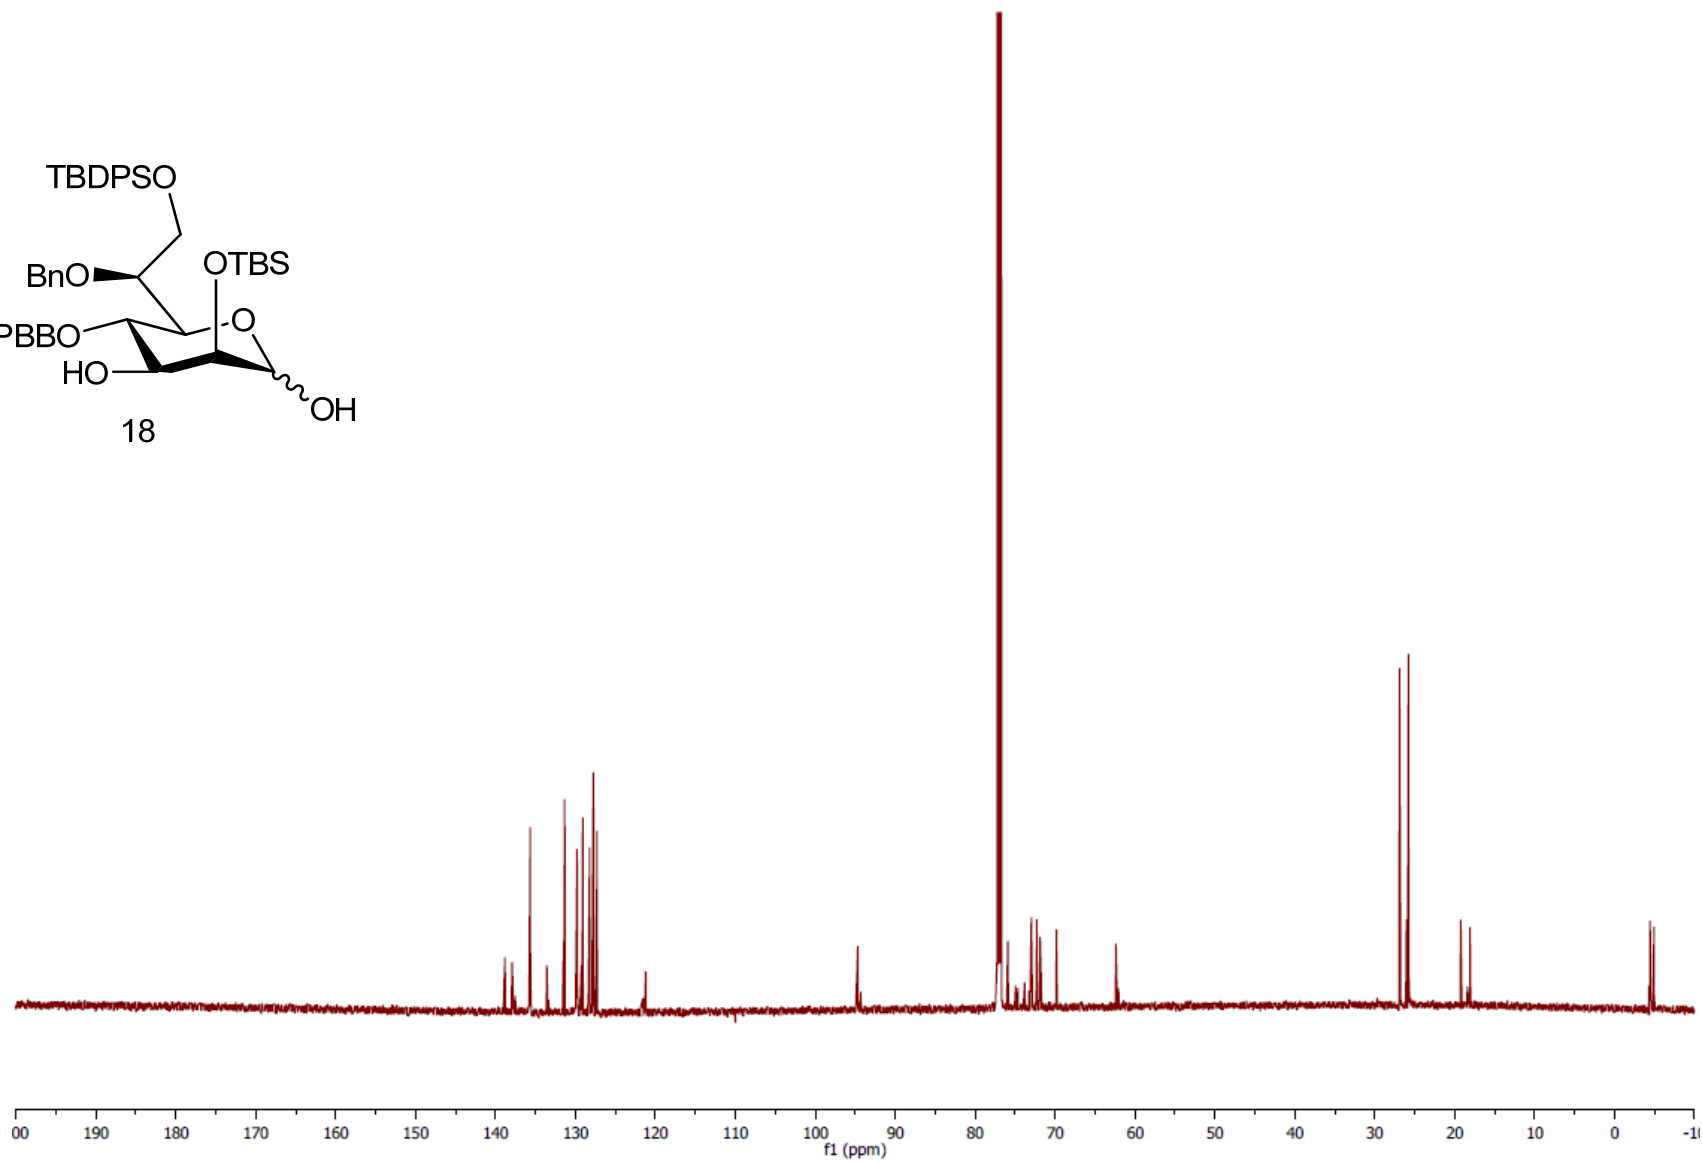



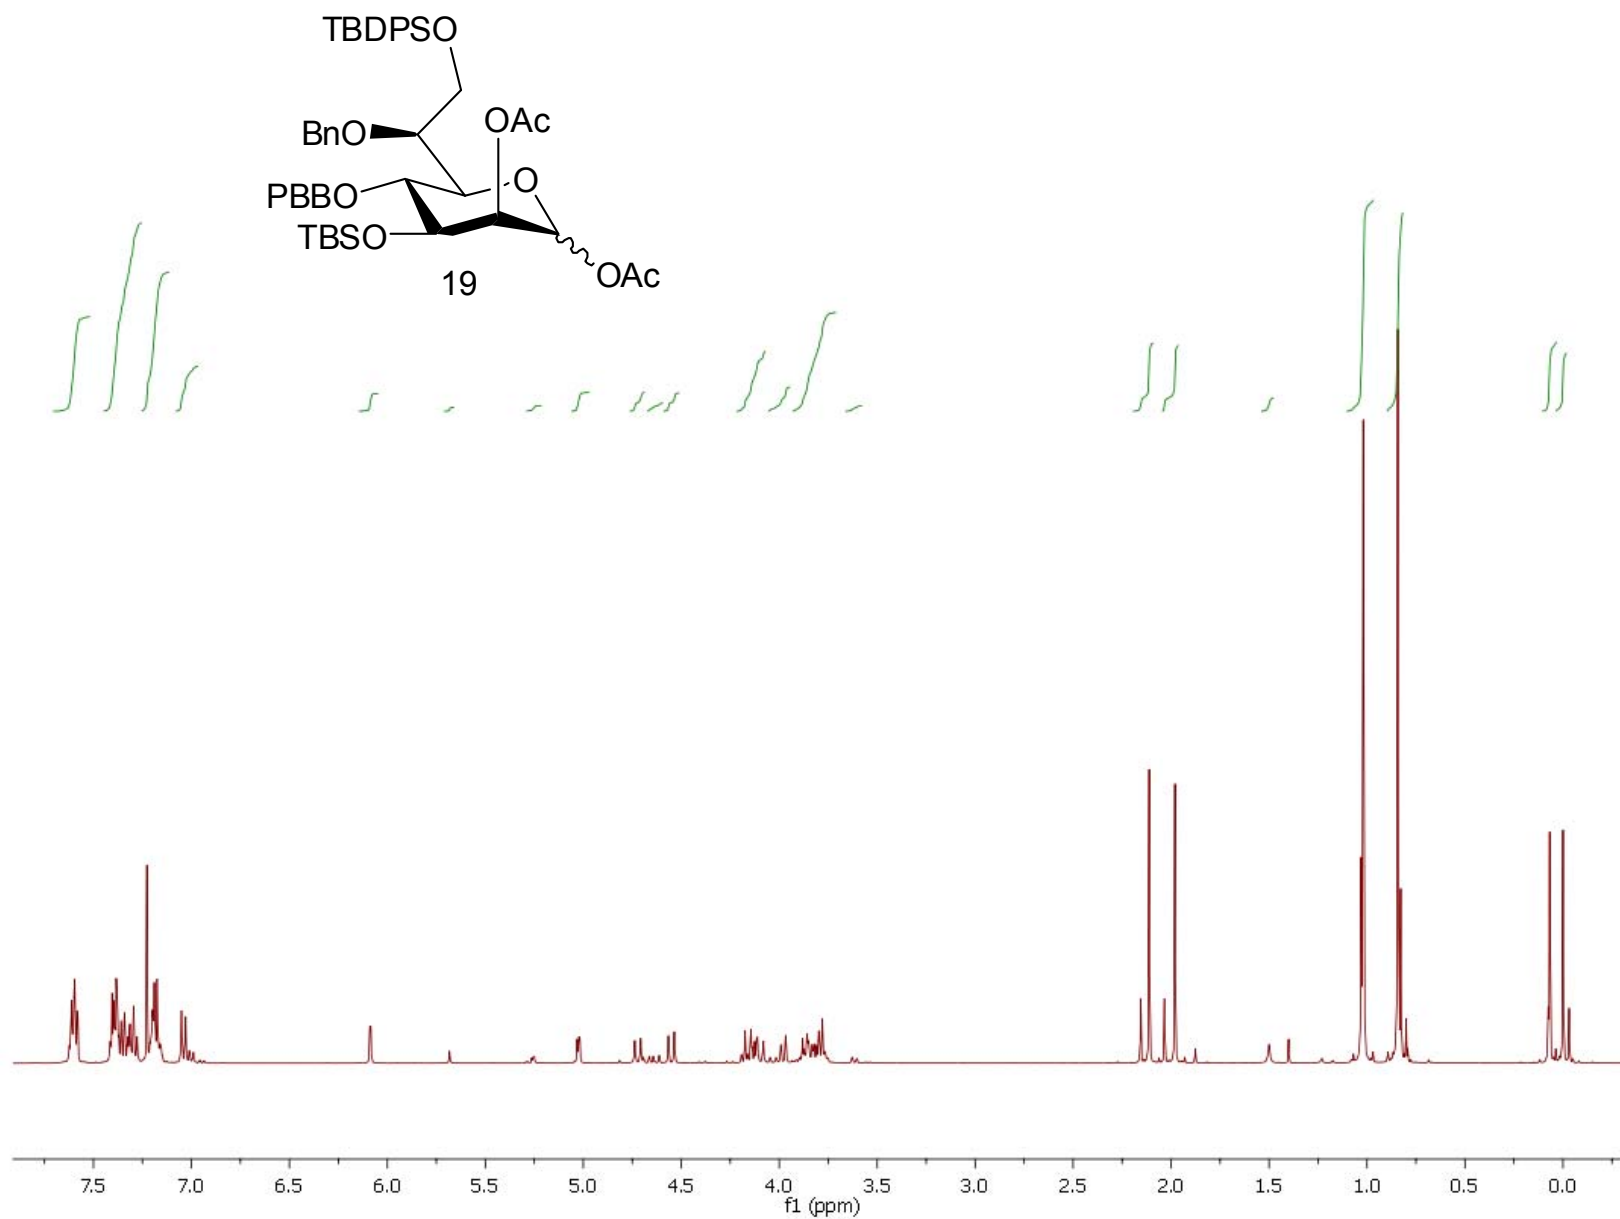

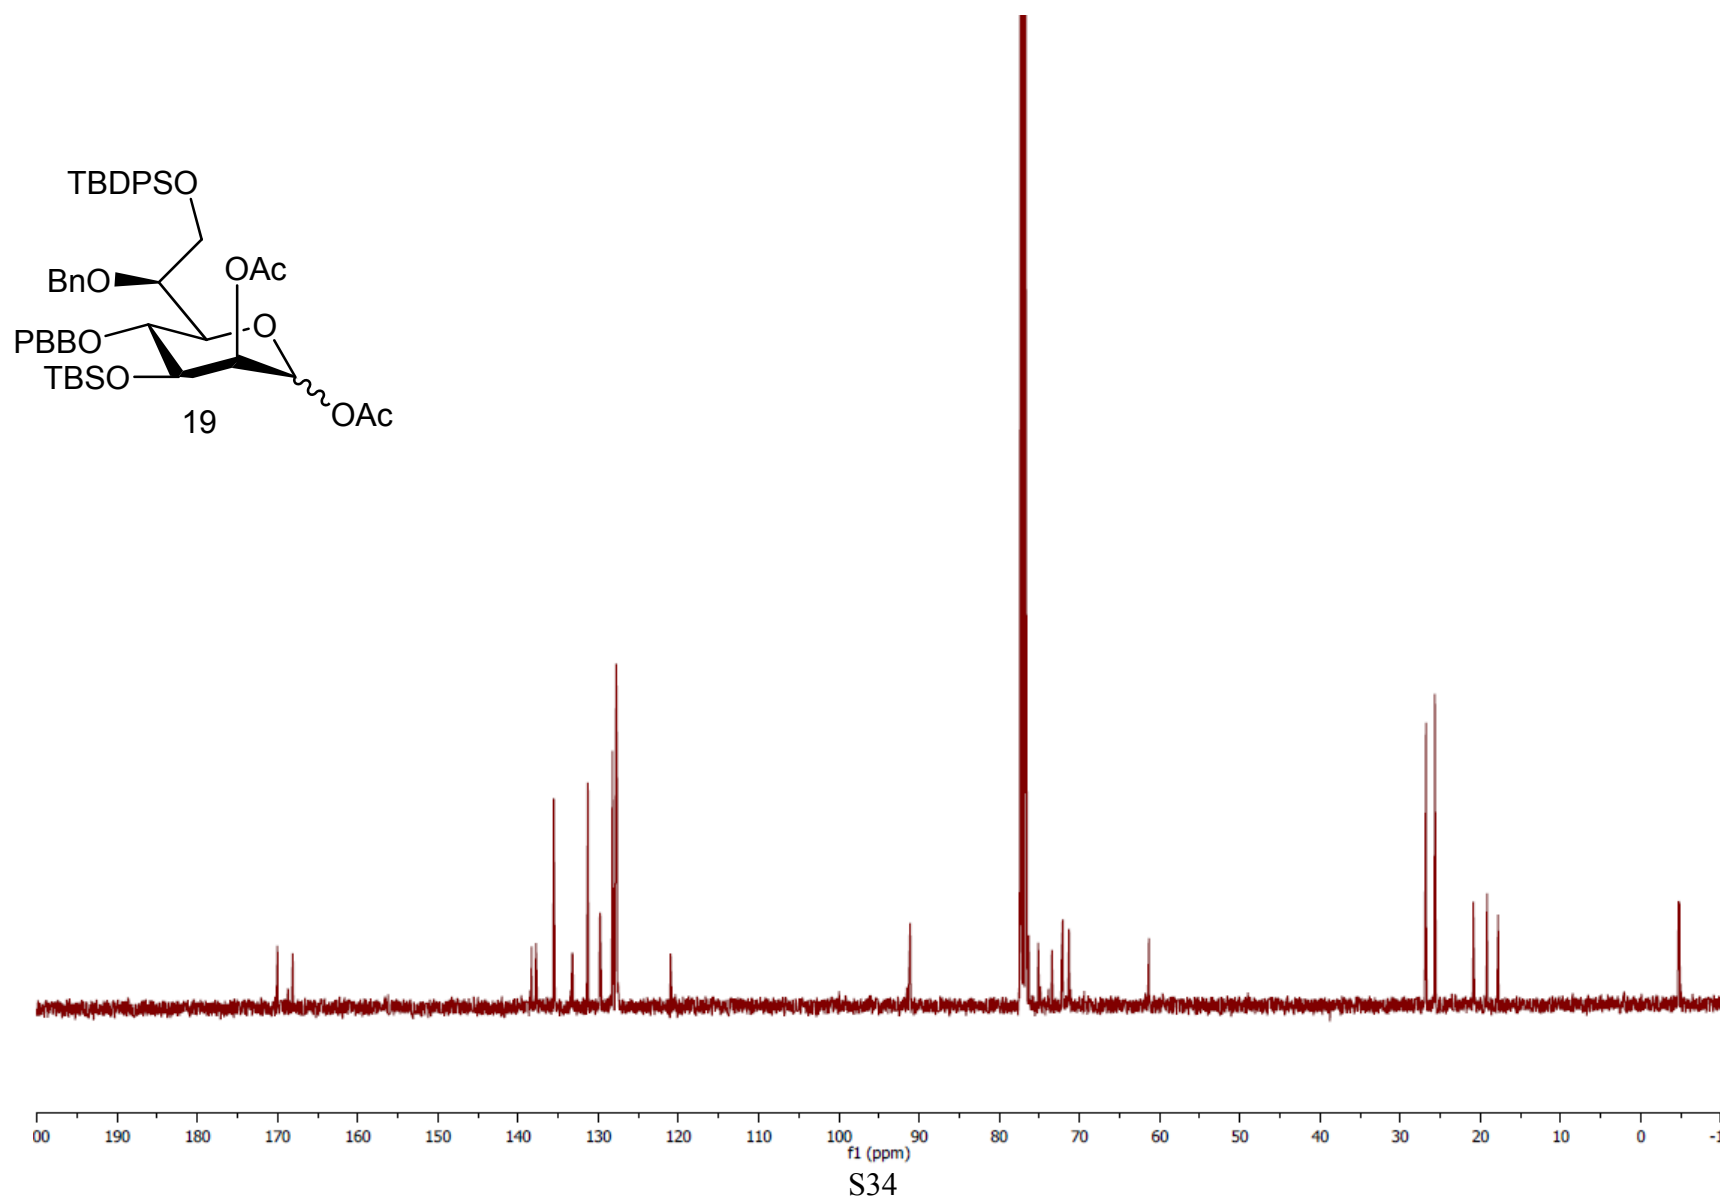

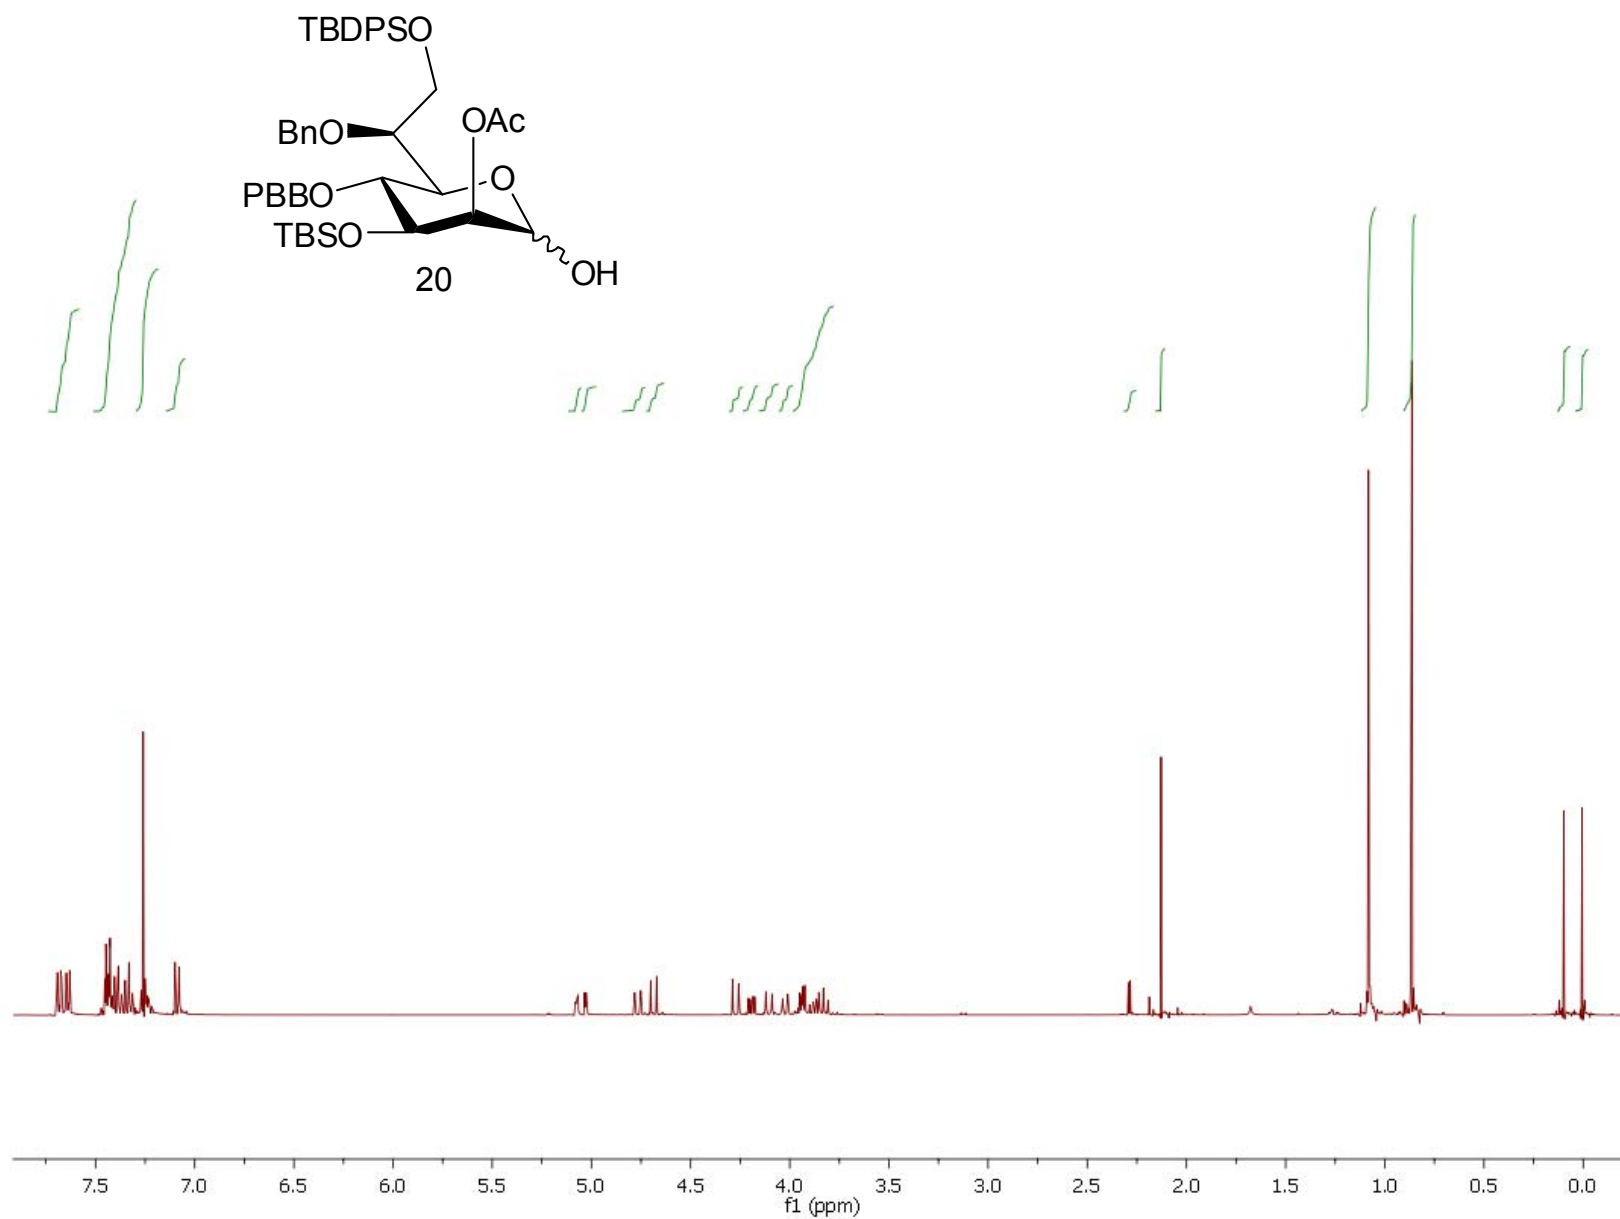

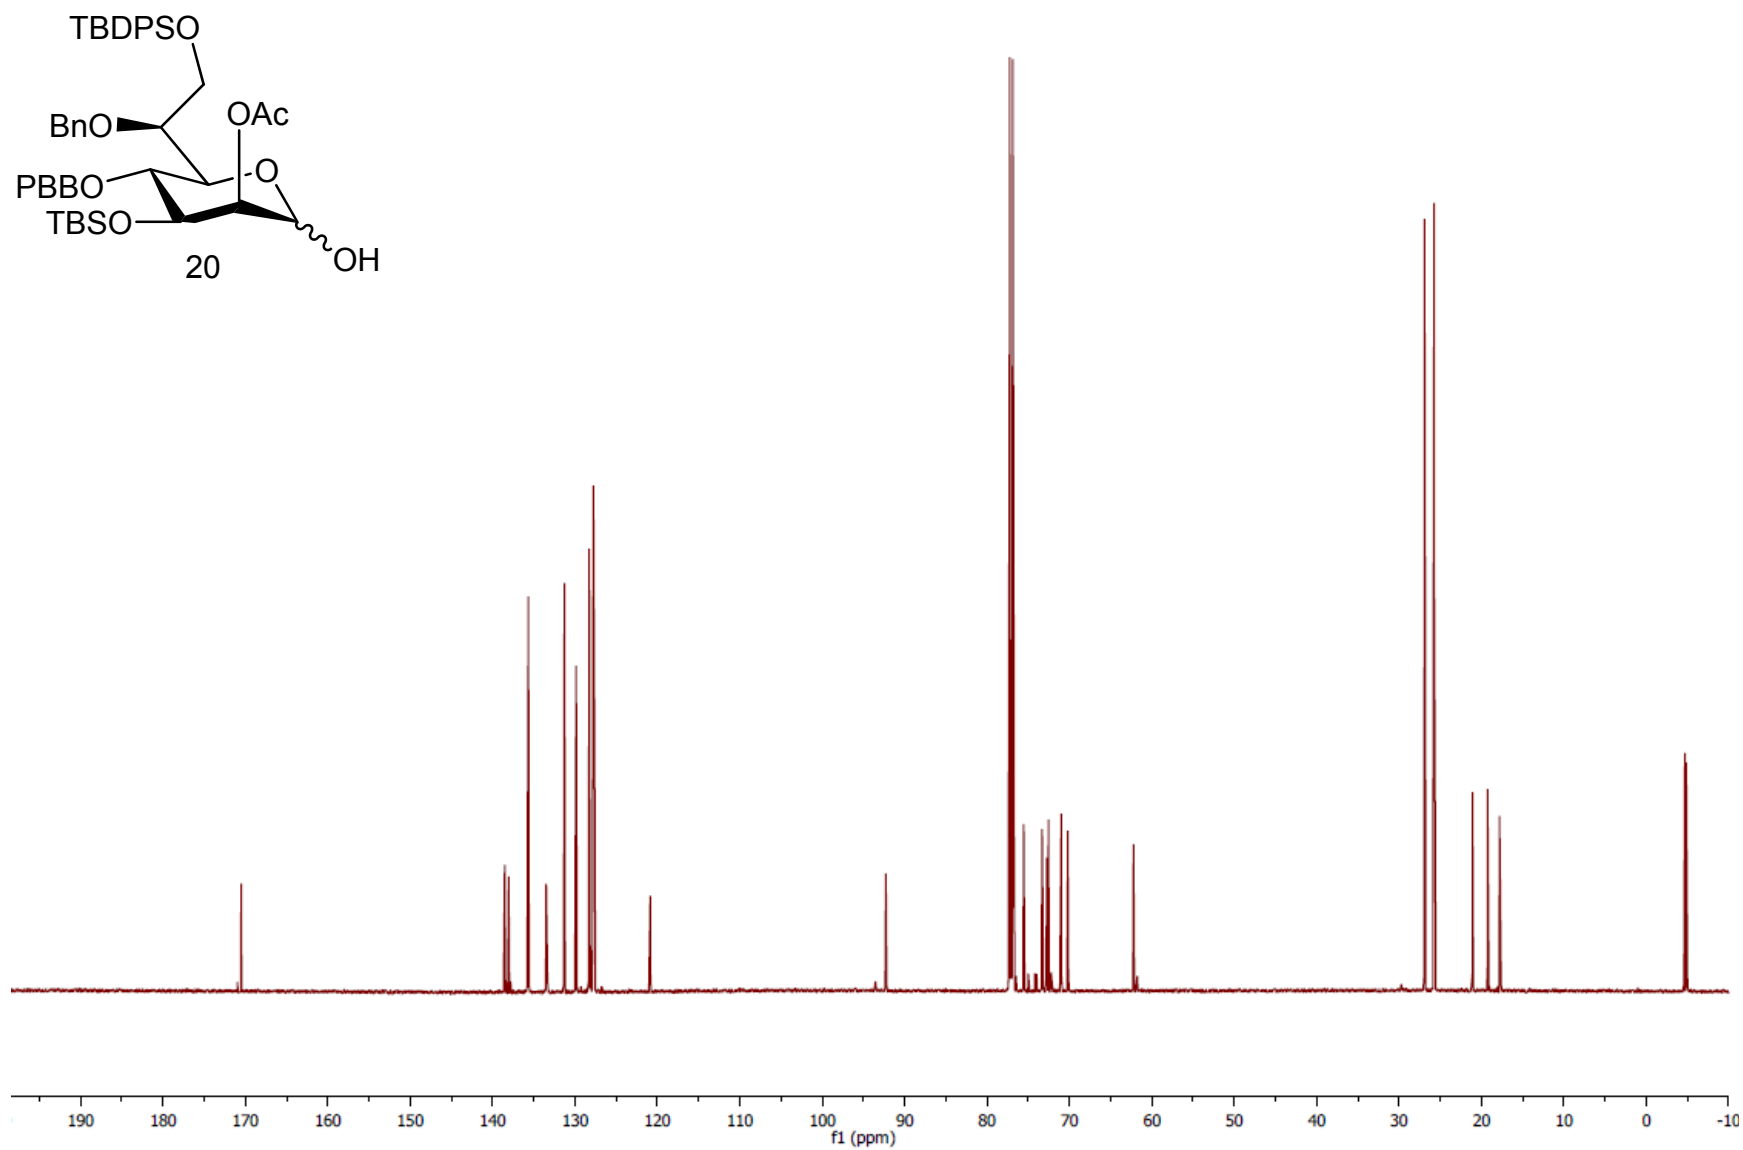

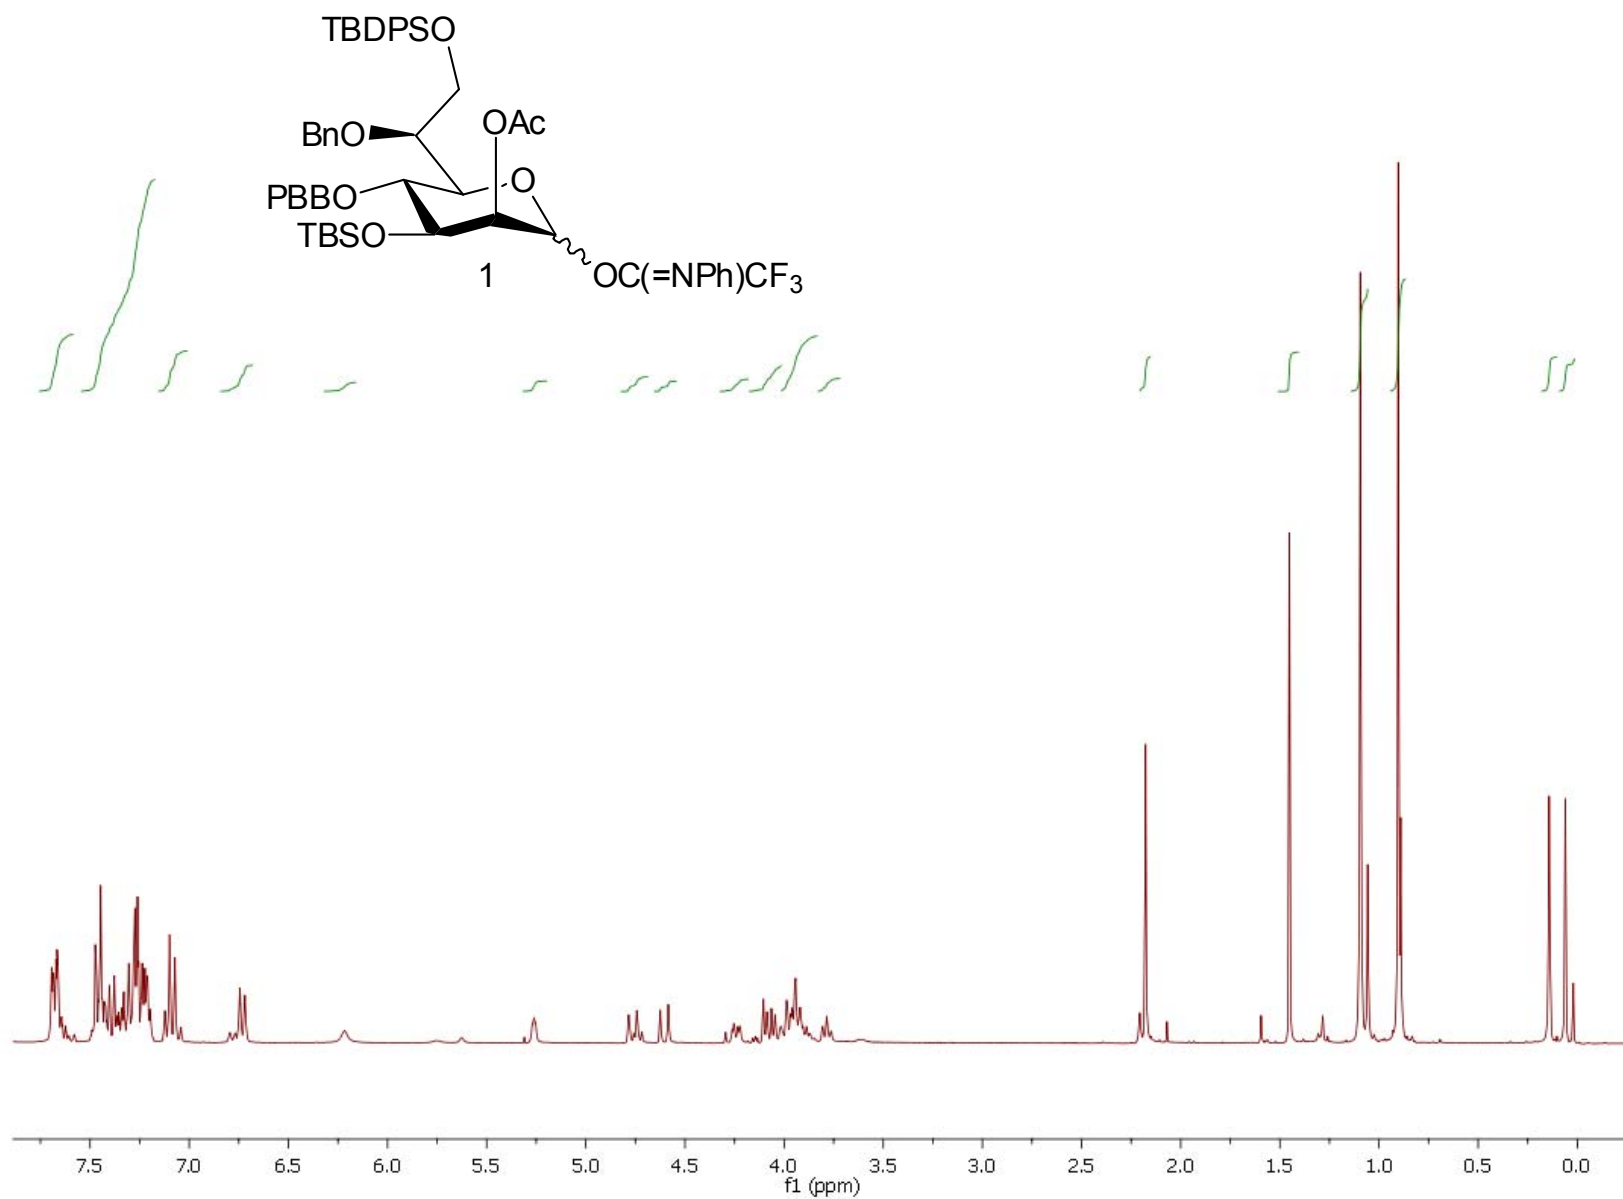

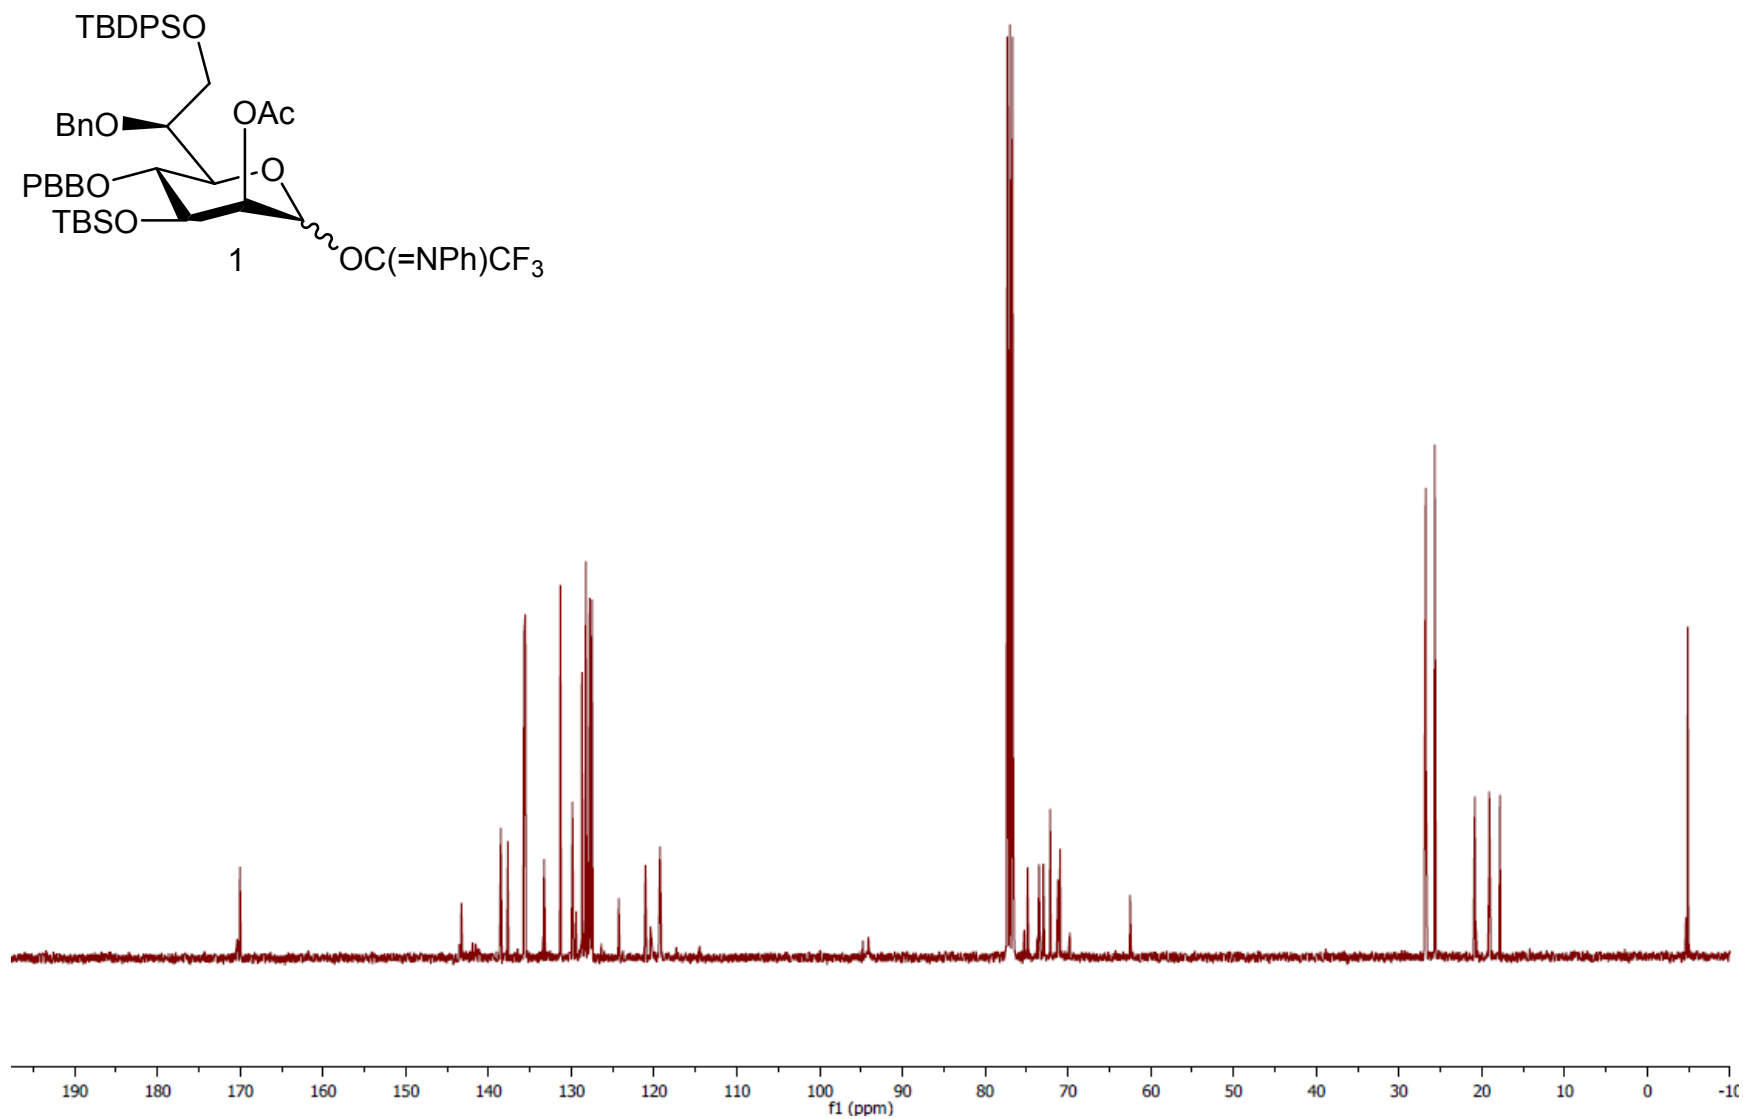

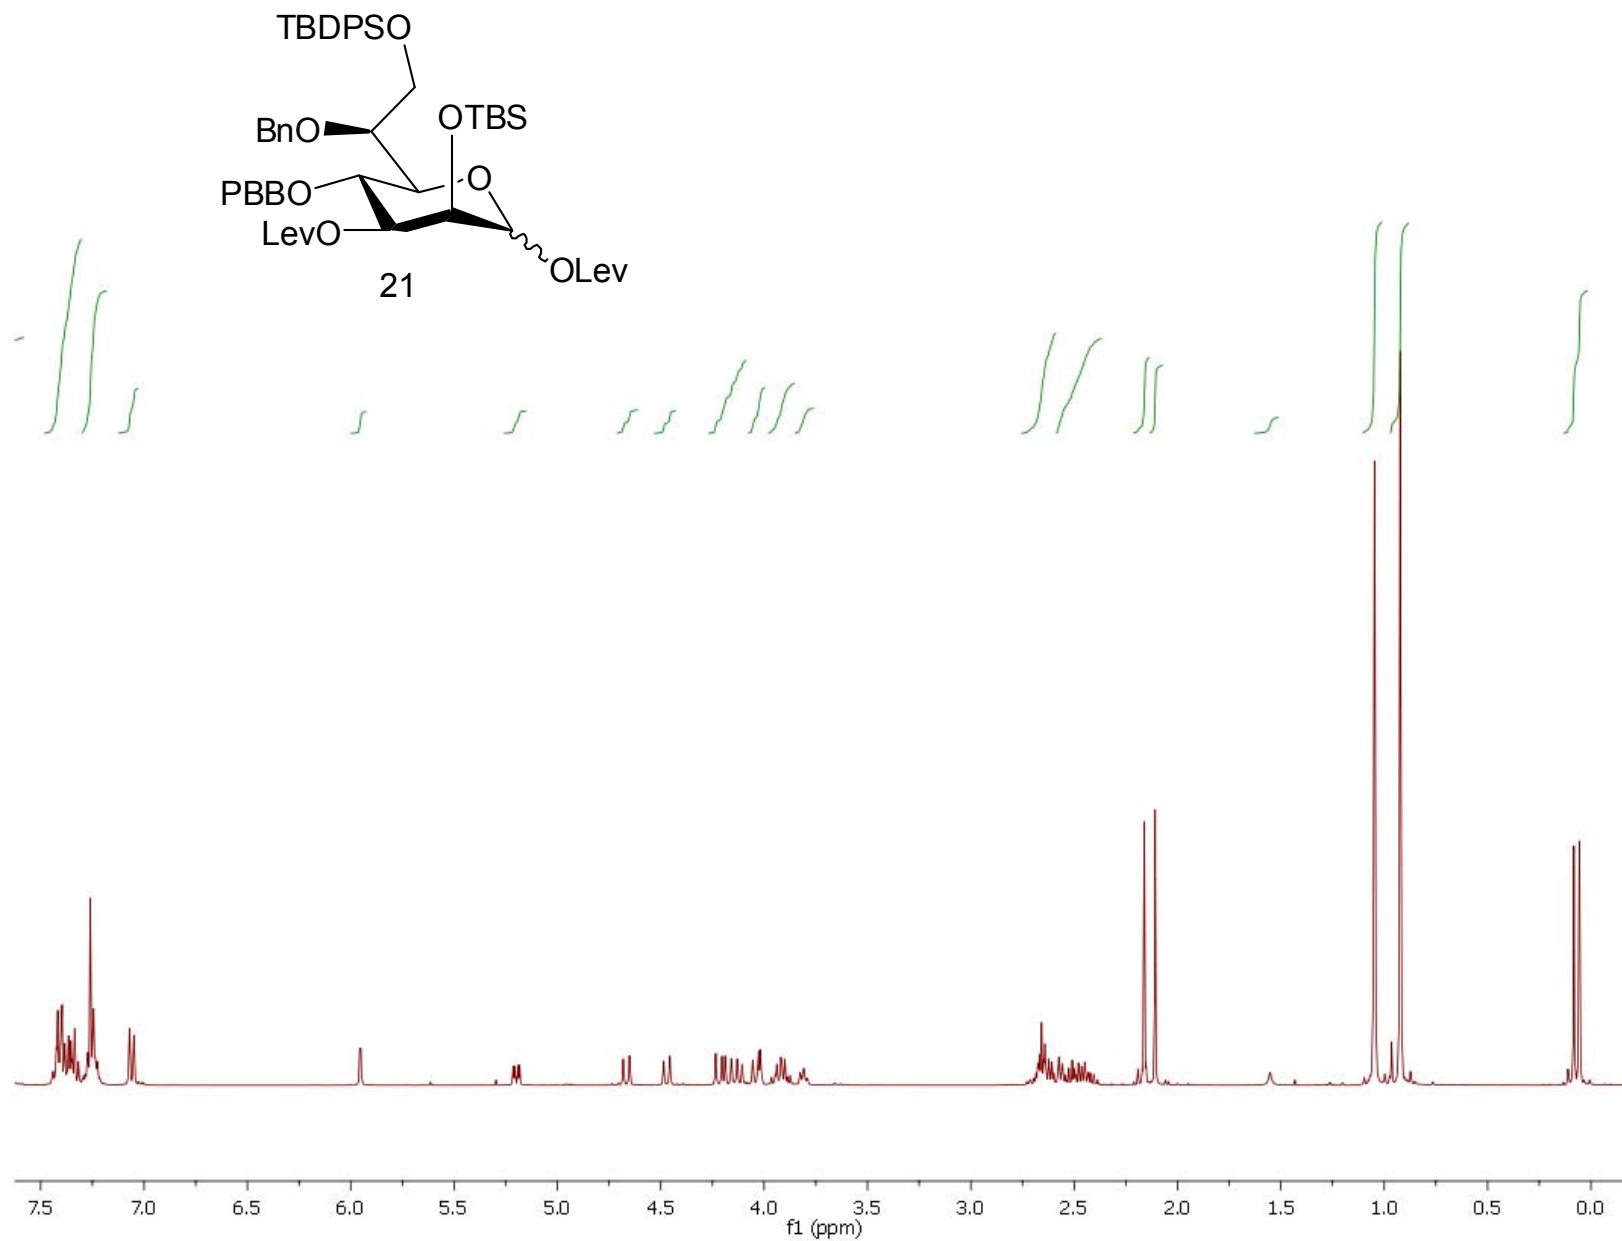

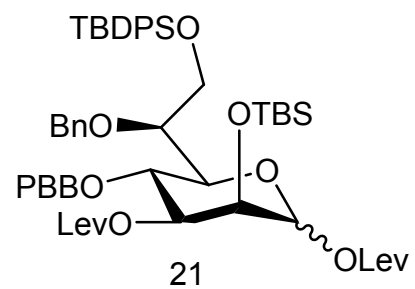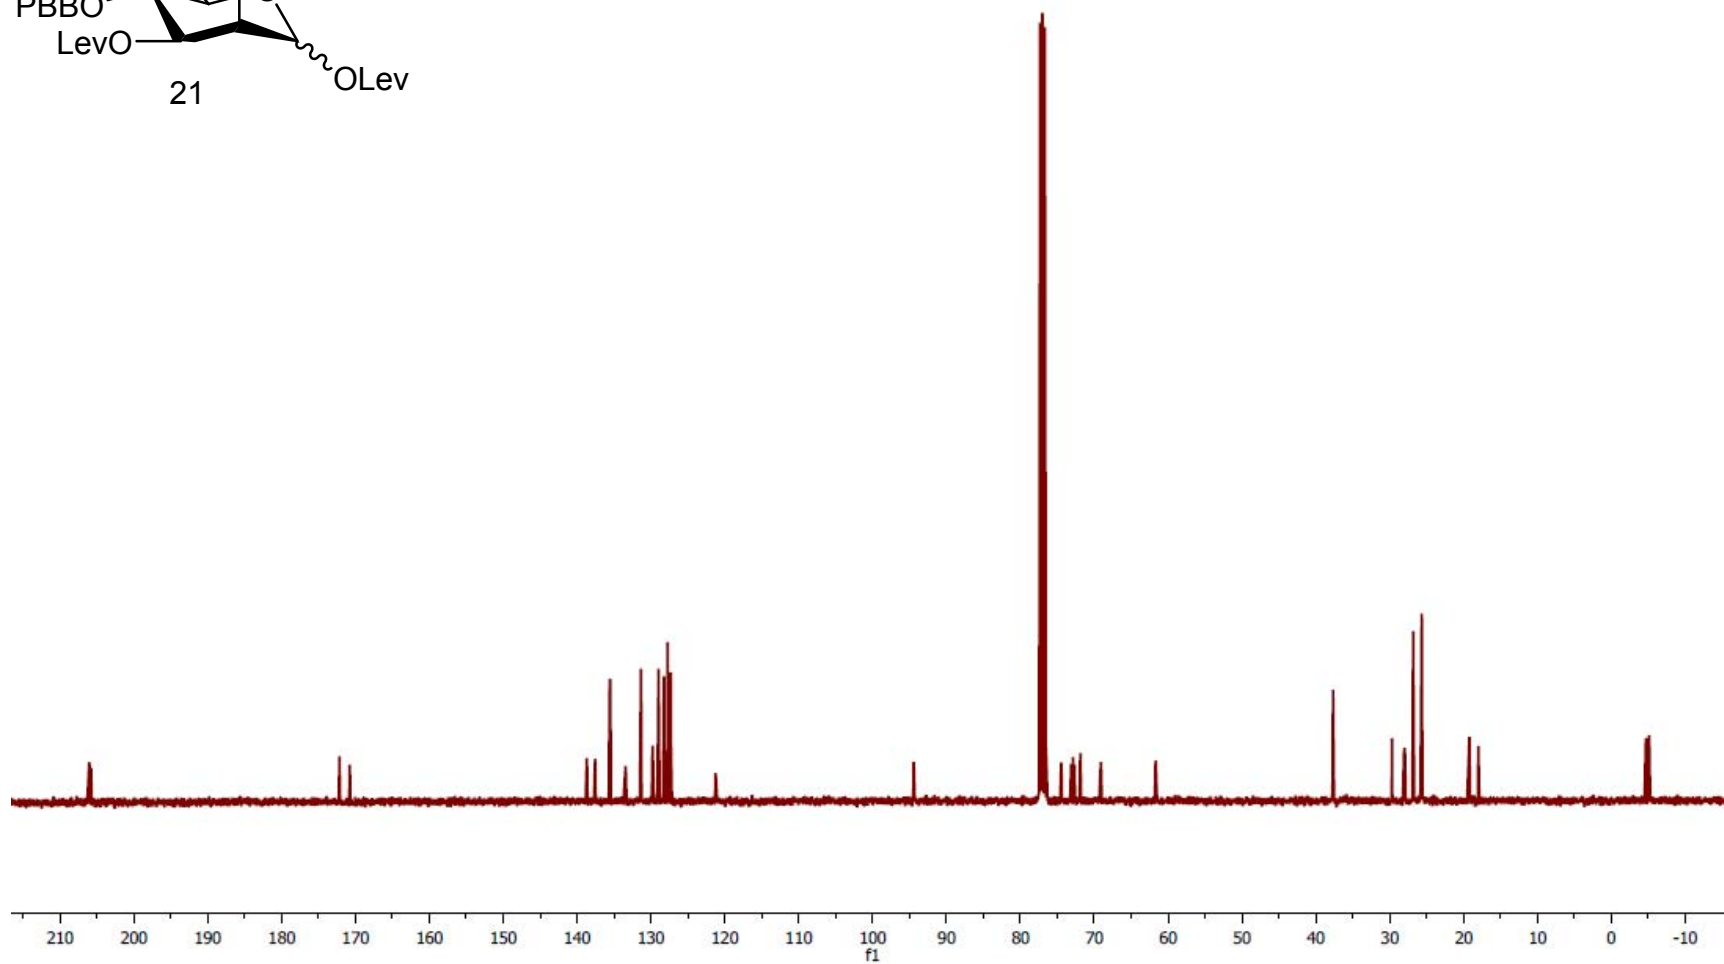



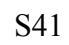

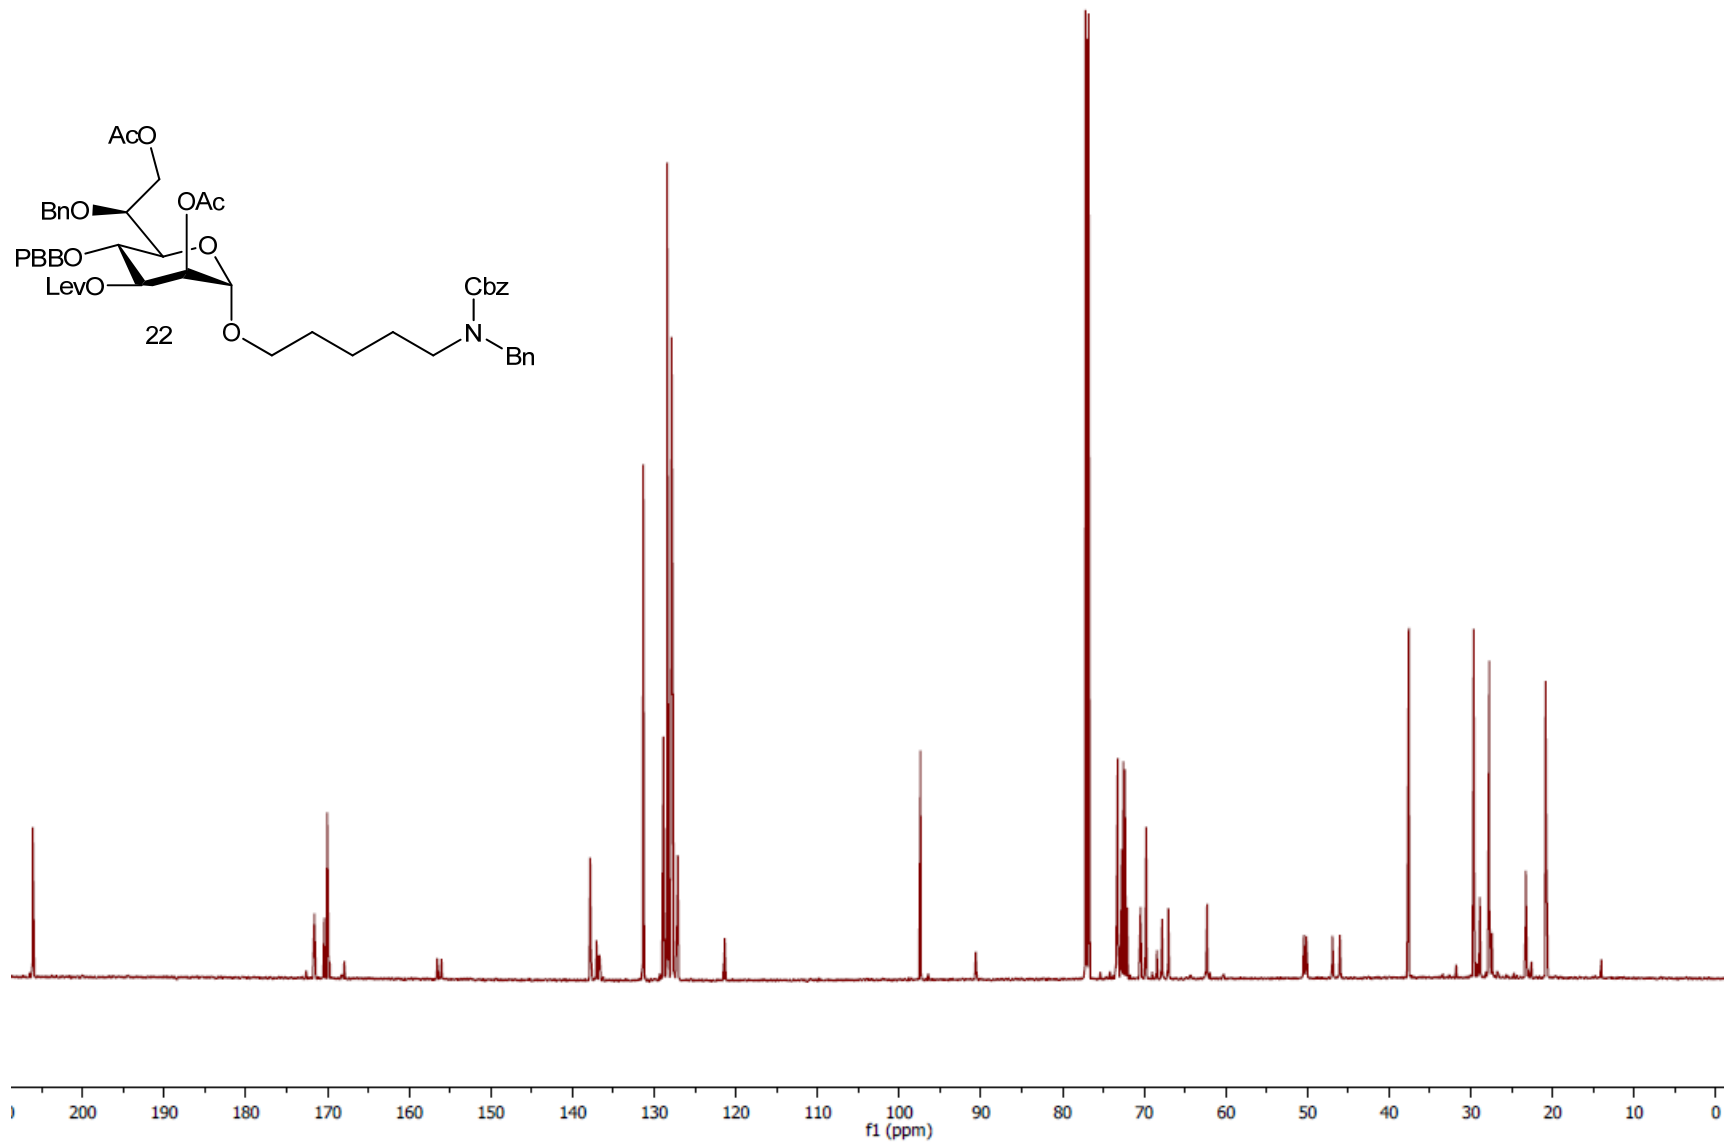

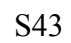

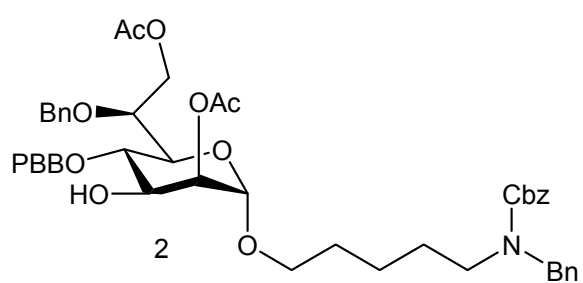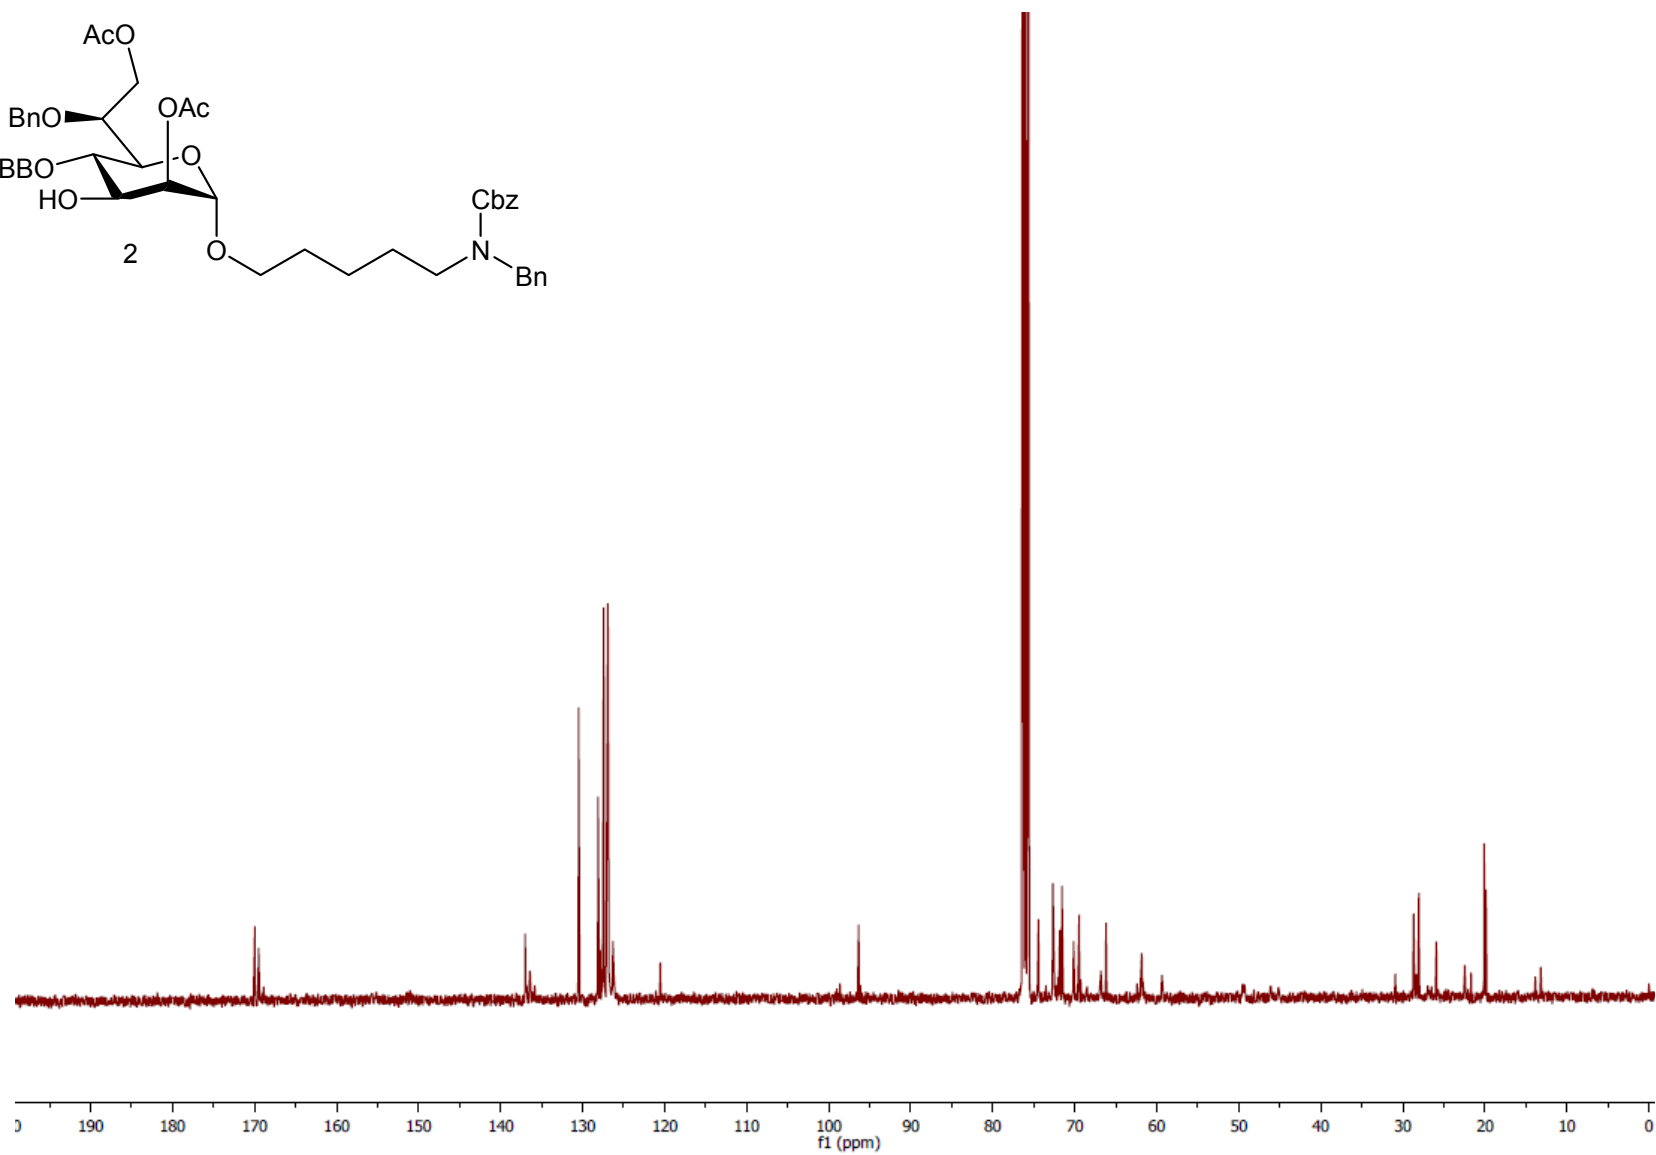

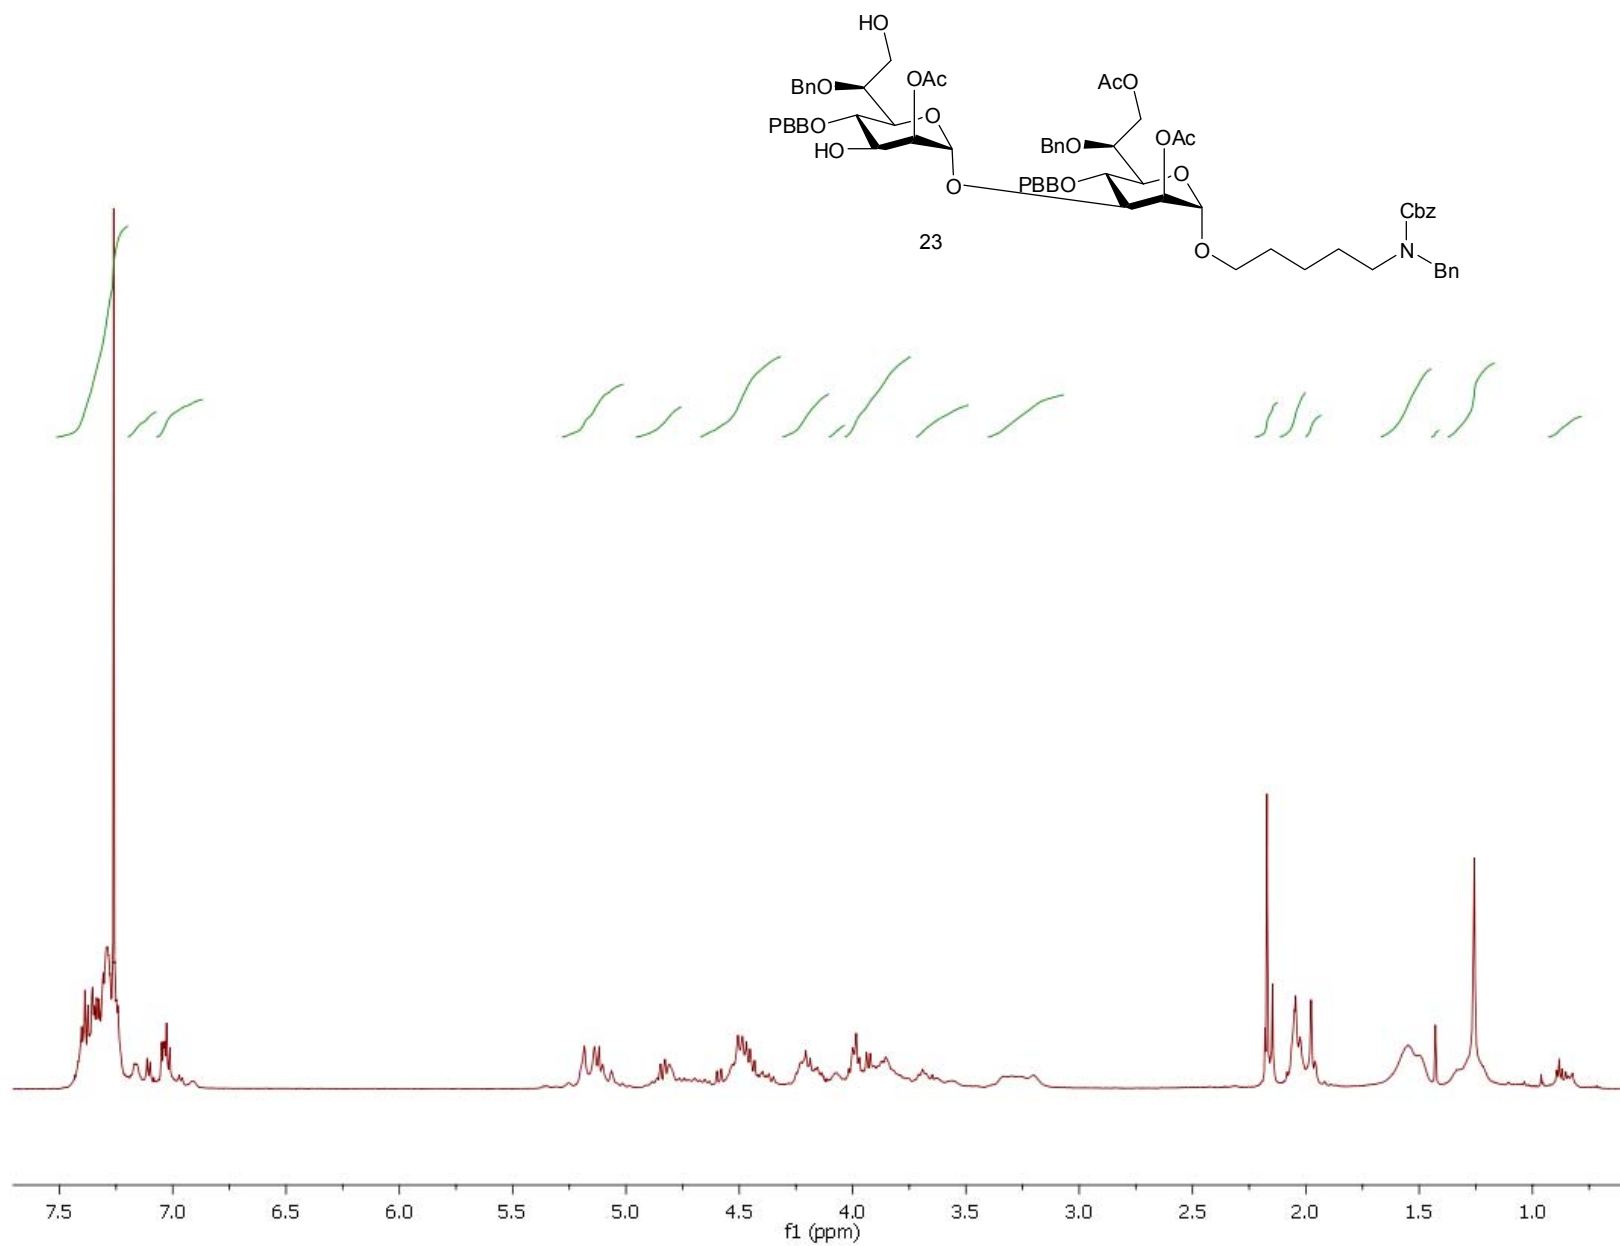

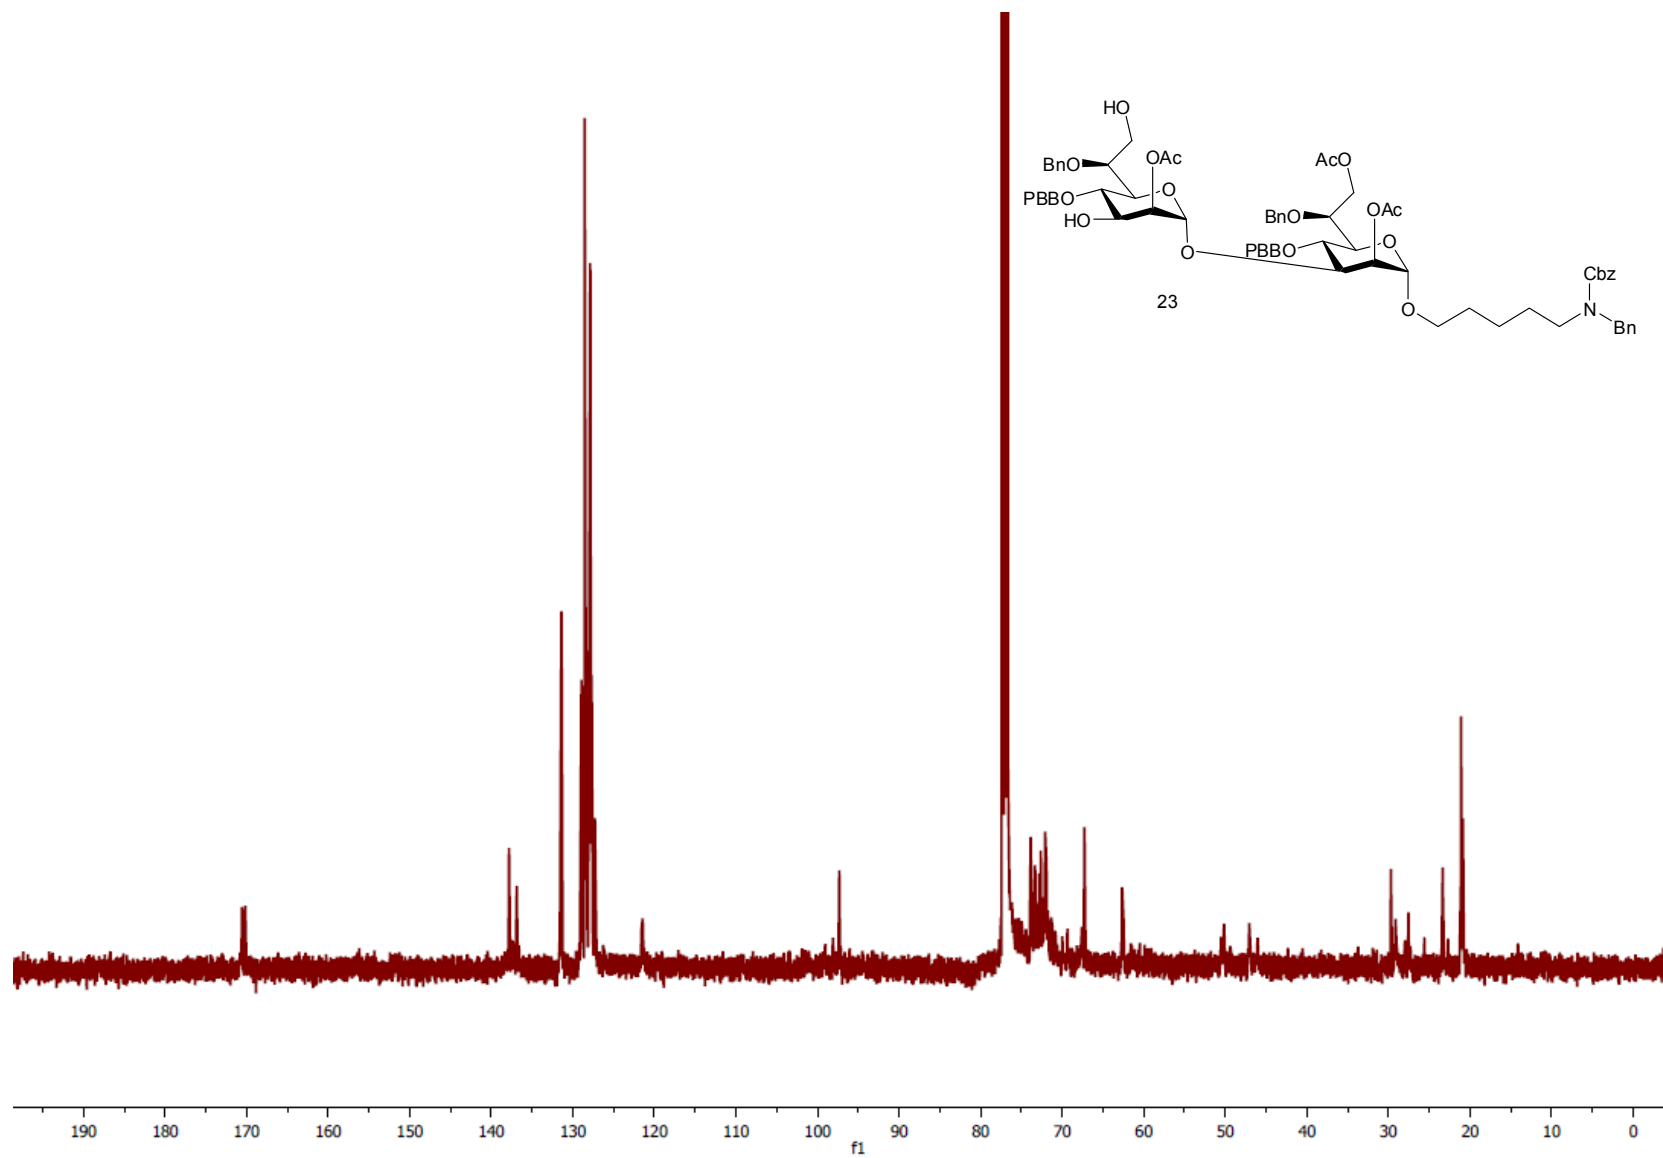

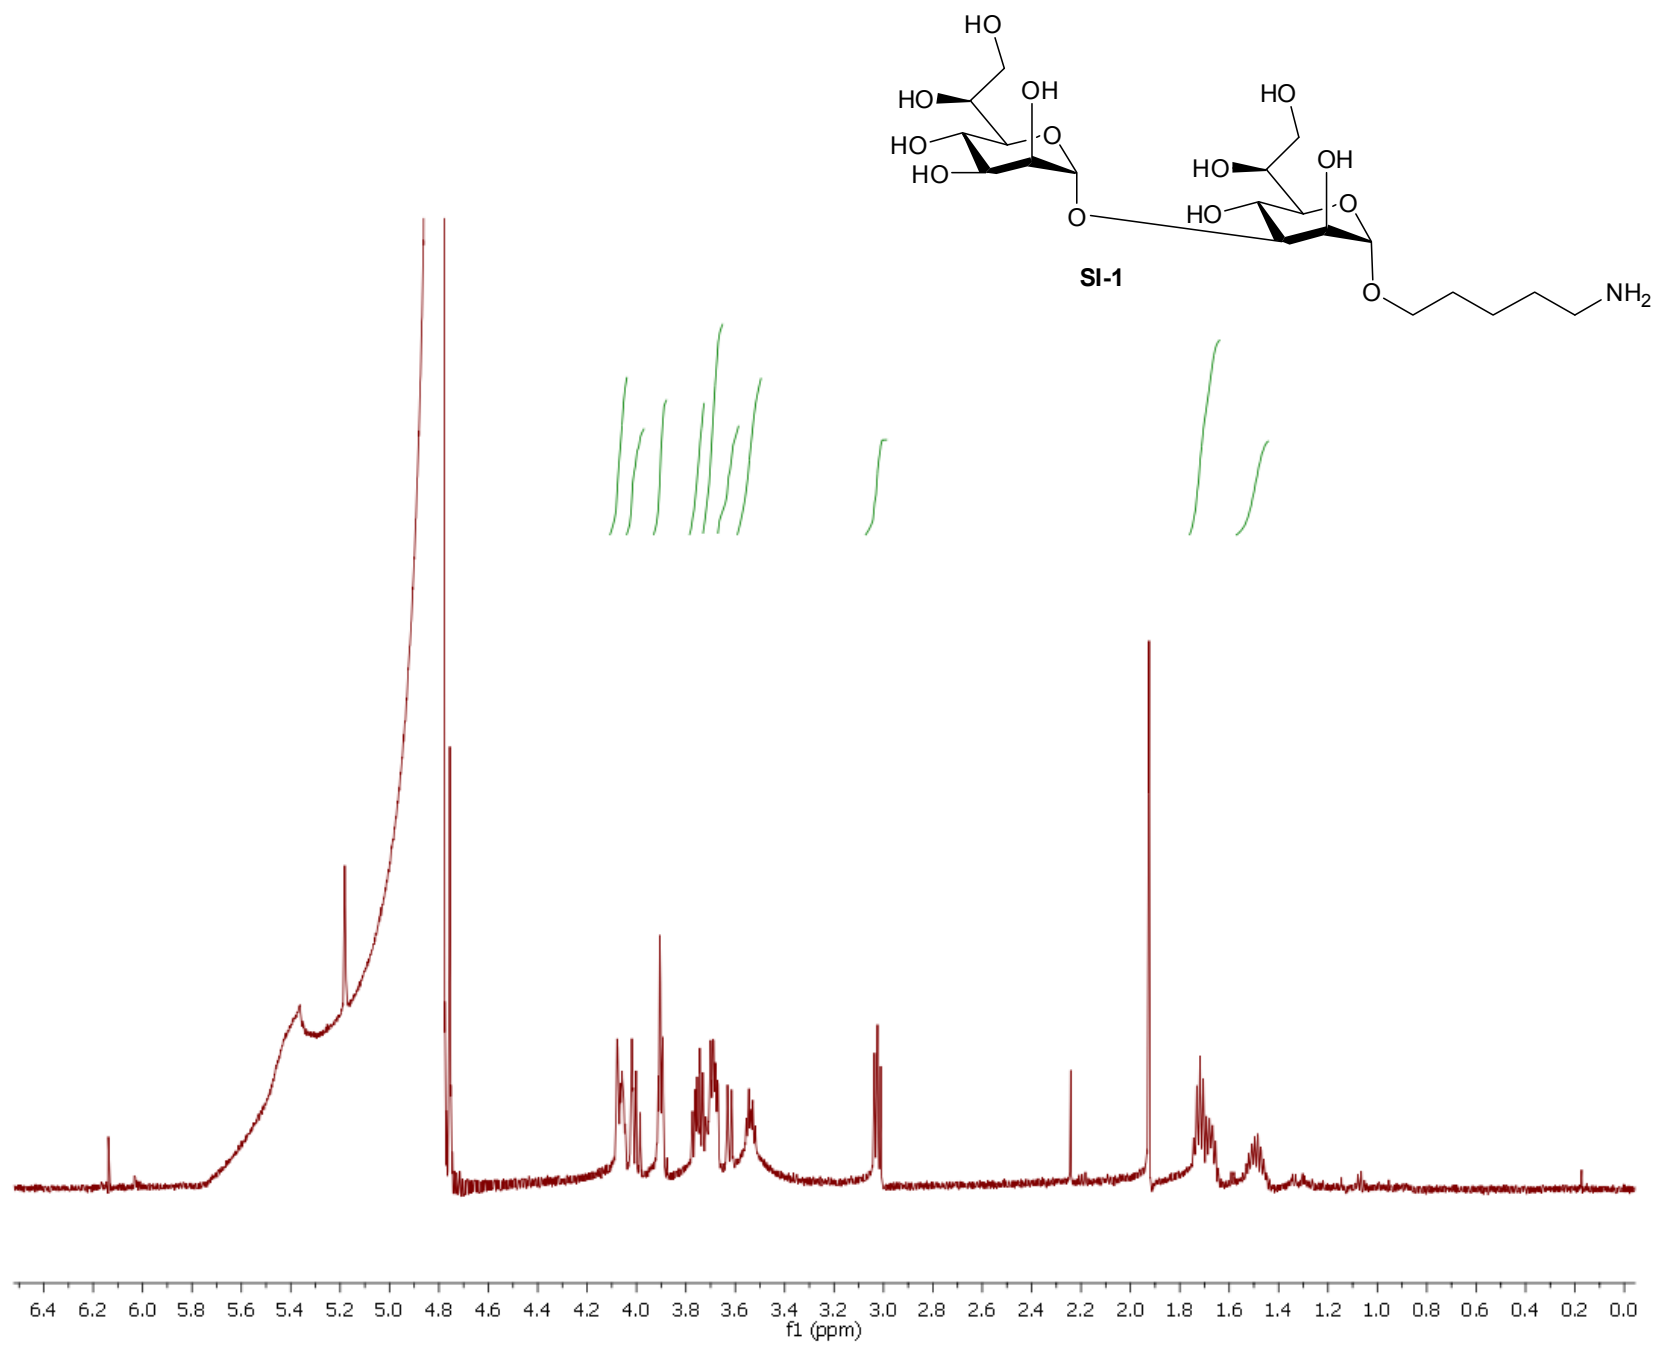

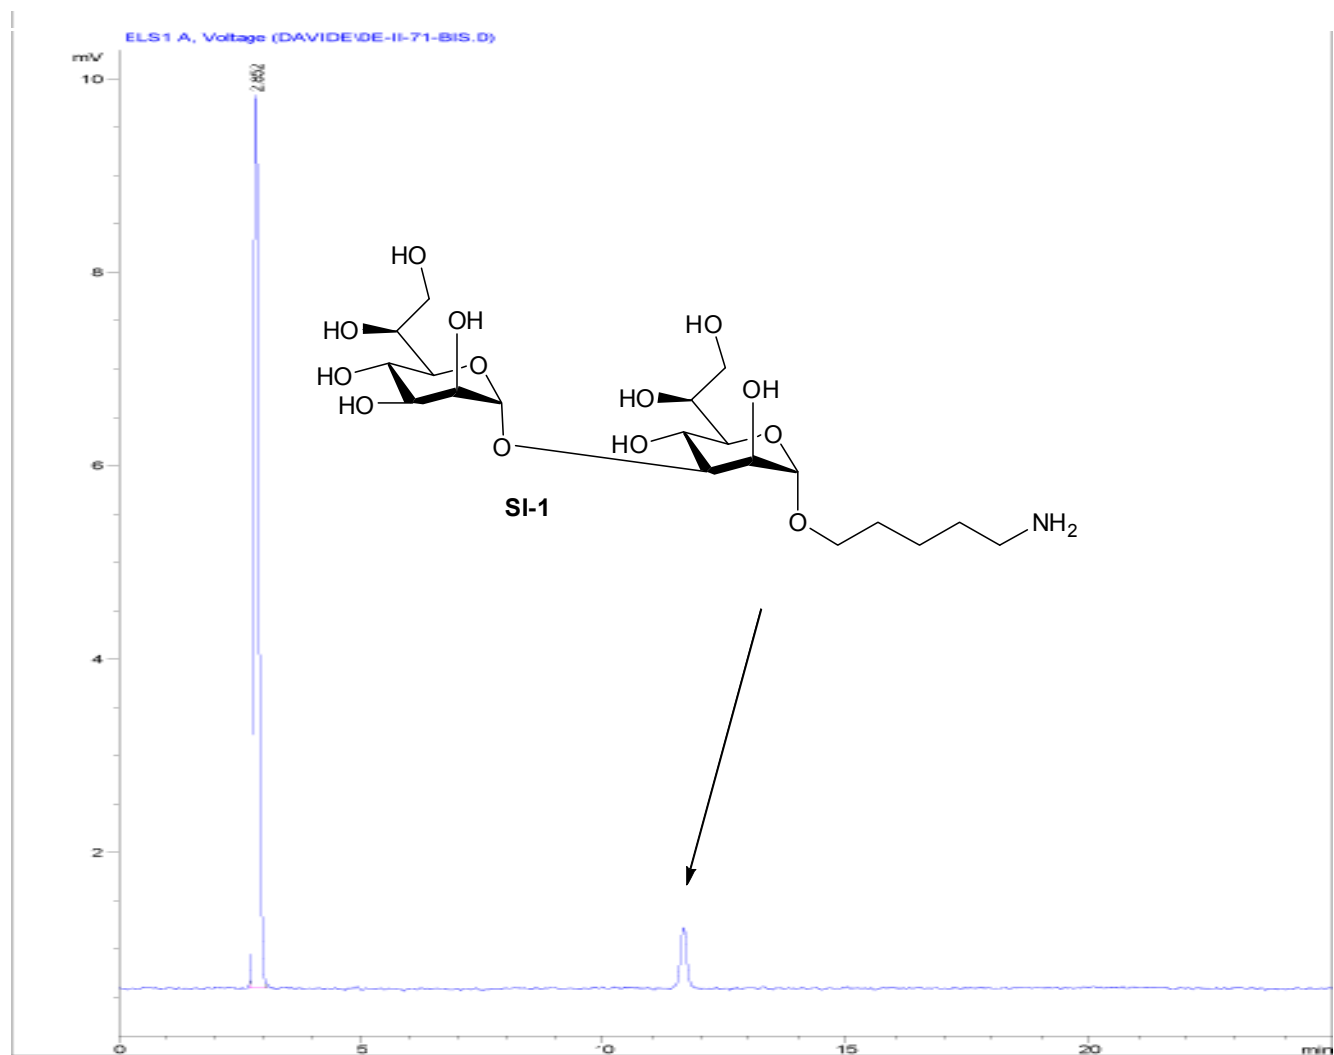

Supplement: c000784f.pdf [file c000784f.pdf]
